# Supplementary material for: Leveraging Fecal Bacterial Survey Data to Predict Colorectal Tumors
Source: Front Genet. 2019 May 28;10:447. doi: 10.3389/fgene.2019.00447 (PMC6547015; doi:10.3389/fgene.2019.00447)
Supplement: Supplementary file 5 [file Table_3.XLSX]

## Sheet: Baxter_16AdnGenusWilcoxTest
Supplementary Table3. The Wilcoxon test results of the relative abundance of genera for the adenoma versus the normal within the each study.
Adenoma_mean	Adenoma_median	Normal_mean	Normal_median	pvalue	measures	FDR
0.00034605	0	0.000444157	0	0.71164	g__Bacteroides_pectinophilus_group	0.850015
0.000132019	0	0.000305998	0	0.0350466	g__Clostridium_innocuum_group	0.710973
0.000220032	8.80127e-05	0.000247664	0	0.679191	g__Eubacterium_brachy_group	0.848349
0.0283741	0.0146981	0.0203698	0.0151382	0.254683	g__Eubacterium_coprostanoligenes_group	0.737037
0.00283041	0.00149622	0.00229652	0.000792114	0.0343048	g__Eubacterium_eligens_group	0.710973
1.80026e-05	0	9.21063e-06	0	0.0647073	g__Eubacterium_fissicatena_group	0.710973
0.0219932	0.0164584	0.0250887	0.0192748	0.526366	g__Eubacterium_hallii_group	0.780636
0.000364052	0	0.000301904	0	0.823702	g__Eubacterium_nodatum_group	0.904179
0	0	0	0		g__Eubacterium_oxidoreducens_group
0.00252636	0	0.00172955	0	0.00975093	g__Eubacterium_ruminantium_group	0.710973
0	0	0	0		g__Eubacterium_saphenum_group
0.00120217	0.00105615	0.00155762	0.00105615	0.416625	g__Eubacterium_ventriosum_group	0.753736
0.00113416	0.000528076	0.00198643	0.000528076	0.887406	g__Eubacterium_xylanophilum_group	0.950762
0	0	0	0		g__Eubacterium_yurii_group
0.00437463	0.00176025	0.0041673	0.00167224	0.745425	g__Ruminococcus_gauvreauii_group	0.855112
0.00311245	0.000264038	0.00983695	0.000352051	0.235084	g__Ruminococcus_gnavus_group	0.718415
0.0143461	0.0109136	0.0171962	0.0116177	0.492808	g__Ruminococcus_torques_group	0.757063
0	0	1.0234e-05	0	0.313573	g__A2	0.748655
4.00058e-06	0	0	0	0.0482442	g__Abiotrophia	0.710973
2.8004e-05	0	3.68425e-05	0	0.617826	g__Acetanaerobacterium	0.813312
0	0	0	0		g__Acetatifactor
0.000114016	0	4.60531e-05	0	0.62215	g__Acetitomaculum	0.813312
0.00546679	0	0.00260354	0	0.249053	g__Acidaminococcus	0.734435
0	0	0	0		g__Acidobacterium
6.00086e-06	0	1.0234e-05	0	0.629571	g__Acinetobacter	0.813312
0.000388056	0.000176025	0.000581293	0.000352051	0.0183551	g__Actinomyces	0.710973
4.00058e-06	0	0	0	0.164552	g__Actinotignum	0.710973
0.000568082	0.000176025	0.000986561	0.000264038	0.701797	g__Adlercreutzia	0.850015
0	0	1.22808e-05	0	0.479471	g__Aerococcus	0.753736
2.00029e-06	0	1.0234e-06	0	0.632674	g__Aeromonas	0.813312
0.0325947	0.0227953	0.0322464	0.0234114	0.911875	g__Agathobacter	0.962254
0.0228593	0.00492871	0.0277752	0.00748108	0.206142	g__Akkermansia	0.710973
0.0468988	0.0437423	0.03341	0.0221792	0.000831209	g__Alistipes	0.317522
0	0	0	0		g__Aliterella_CENA595
0	0	0	0		g__Alkanindiges
0.000150022	0	5.21936e-05	0	0.131688	g__Allisonella	0.710973
0	0	2.76319e-05	0	0.313573	g__Allobaculum	0.748655
0.00113216	0	0.000357168	0	0.278109	g__Alloprevotella	0.748655
0	0	0	0		g__Allorhizobium_Neorhizobium_Pararhizobium_Rhizobium
1.00014e-05	0	1.0234e-06	0	0.227814	g__Alloscardovia	0.718415
4.00058e-06	0	1.43276e-05	0	0.147852	g__Anaerococcus	0.710973
0	0	2.04681e-06	0	0.479471	g__Anaerocolumna	0.753736
6.00086e-05	0	5.52638e-05	0	0.580961	g__Anaerofilum	0.808298
8.40121e-05	0	7.06148e-05	0	0.847972	g__Anaerofustis	0.921067
2.20032e-05	0	1.0234e-06	0	0.226005	g__Anaeroglobus	0.718415
1.4002e-05	0	0.000136113	0	0.264016	g__Anaeroplasma	0.748655
0	0	3.07021e-05	0	0.0559494	g__Anaerosporobacter	0.710973
0	0	0	0		g__Anaerosporomusa
0.0227533	0.020859	0.0309641	0.020947	0.175102	g__Anaerostipes	0.710973
0.000222032	0	0.000231289	0	0.588237	g__Anaerotruncus	0.808298
0	0	0	0		g__Anaerovibrio
6.00086e-06	0	2.04681e-06	0	0.214271	g__Anaerovorax	0.710973
1.80026e-05	0	8.18723e-06	0	0.135739	g__Angelakisella	0.710973
0	0	0	0		g__Arachis_hypogaea_var__vulgaris
4.00058e-06	0	1.0234e-06	0	0.628583	g__Arthrospira_PCC_7345	0.813312
0	0	1.0234e-06	0	0.479471	g__ASF356	0.753736
0	0	4.09361e-06	0	0.313573	g__Asteroleplasma	0.748655
8.80127e-05	0	1.84213e-05	0	0.358875	g__Atopobium	0.753736
0.000102015	0	7.16382e-05	0	0.0875679	g__Azospirillum_sp__47_25	0.710973
2.00029e-05	0	2.66085e-05	0	0.518195	g__Bacillus	0.773244
0	0	0	0		g__bacterium_YC_LK_LKJ22
0	0	1.0234e-06	0	0.479471	g__Bacteroidales_bacterium_55_9	0.753736
0.180012	0.162647	0.156912	0.136772	0.107117	g__Bacteroides	0.710973
0	0	0	0		g__Bacteroidetes_bacterium_OLB10
0.00506873	0.00105615	0.0058641	0.000176025	0.0972773	g__Barnesiella	0.710973
0	0	0	0		g__Bergeyella
0.0150362	0.00352051	0.0190537	0.00440063	0.414811	g__Bifidobacterium	0.753736
0.00128018	0.000704101	0.00100601	0.000176025	0.104758	g__Bilophila	0.710973
0.101843	0.0873086	0.128295	0.103855	0.0338416	g__Blautia	0.710973
0	0	1.0234e-06	0	0.479471	g__Brachybacterium	0.753736
0	0	0	0		g__Brachyspira
0	0	1.0234e-06	0	0.479471	g__Bradyrhizobium	0.753736
0	0	1.0234e-06	0	0.479471	g__Brochothrix	0.753736
0	0	0	0		g__Bulleidia
0.00297843	0.00193628	0.00318278	0.00228833	0.372842	g__Butyricicoccus	0.753736
0.00134419	0.000352051	0.00087194	0	0.117068	g__Butyricimonas	0.710973
0.000680098	0	0.000427783	0	0.01344	g__Butyrivibrio	0.710973
0.000734106	0	0.000488163	0	0.161657	g__CAG_352	0.710973
0.00131819	0.000352051	0.00129768	0	0.12057	g__CAG_56	0.710973
0	0	7.67552e-05	0	0.479471	g__CAG_873	0.753736
0	0	0	0		g__Caldicoprobacter
0	0	0	0		g__Calditerricola
2.60037e-05	0	1.84213e-05	0	0.283912	g__Campylobacter	0.748655
0	0	0	0		g__candidate_division_SR1_bacterium_taxon_345
0	0	0	0		g__Candidatus_Alysiosphaera
0	0	6.14042e-06	0	0.313569	g__Candidatus_Arthromitus	0.748655
2.00029e-06	0	0.00014123	0	0.984966	g__Candidatus_Gastranaerophilales_bacterium_Zag_111	0.989568
1.4002e-05	0	6.3451e-05	0	0.174034	g__Candidatus_Melainabacteria_bacterium_MEL_A1	0.710973
0	0	0	0		g__Candidatus_Methanomethylophilus
2.00029e-06	0	0	0	0.164552	g__Candidatus_Saccharimonas	0.710973
0.000134019	0	0.000154534	0	0.409548	g__Candidatus_Soleaferrea	0.753736
0.000156022	0	0.000314185	0	0.00368402	g__Candidatus_Stoquefichus	0.703648
1.20017e-05	0	1.22808e-05	0	0.624328	g__Capnocytophaga	0.813312
4.00058e-05	0	4.40063e-05	0	0.717374	g__Caproiciproducens	0.850403
0	0	1.0234e-06	0	0.479471	g__Cardiobacterium	0.753736
9.40135e-05	0	0.000109504	0	0.394072	g__Carnobacterium	0.753736
4.80069e-05	0	5.8334e-05	0	0.48844	g__Catabacter	0.757063
0.000782113	0	0.00126186	0	0.858021	g__Catenibacterium	0.925887
0	0	2.04681e-06	0	0.479471	g__Catenisphaera	0.753736
0	0	0	0		g__Catonella
1.20017e-05	0	0	0	0.0482458	g__Cellulosilyticum	0.710973
8.60124e-05	0	0.000321349	0	0.432791	g__Cercis_gigantea	0.753736
0	0	6.14042e-06	0	0.479471	g__Cetobacterium	0.753736
0	0	9.21063e-06	0	0.151344	g__CHKCI001	0.710973
1.00014e-05	0	4.19595e-05	0	0.421673	g__CHKCI002	0.753736
0.0119717	0.00616089	0.014387	0.0055448	0.557703	g__Christensenellaceae_R_7_group	0.791979
2.00029e-06	0	1.0234e-06	0	0.632674	g__Chryseobacterium	0.813312
0	0	0	0		g__Chthoniobacter
0.000356051	0	0.000710242	0	0.868393	g__Cloacibacillus	0.934439
0	0	3.07021e-06	0	0.313573	g__Cloacibacterium	0.748655
3.60052e-05	0	8.49425e-05	0	0.63562	g__Clostridiales_bacterium_enrichment_culture_clone_06_1235251_67	0.813312
2.20032e-05	0	0.000156581	0	0.468843	g__Clostridioides	0.753736
0.0166044	0.0021123	0.00971824	0.00202429	0.903979	g__Clostridium_sensu_stricto_1	0.959443
0	0	0	0		g__Clostridium_sensu_stricto_11
1.80026e-05	0	9.21063e-06	0	0.980241	g__Clostridium_sensu_stricto_13	0.989568
0	0	0	0		g__Clostridium_sensu_stricto_18
0	0	3.07021e-06	0	0.313573	g__Clostridium_sensu_stricto_2	0.748655
0	0	1.0234e-06	0	0.479471	g__Clostridium_sensu_stricto_3	0.753736
0	0	1.0234e-06	0	0.479471	g__Clostridium_sensu_stricto_6	0.753736
2.00029e-06	0	0	0	0.164552	g__Clostridium_sensu_stricto_9	0.710973
2.60037e-05	0	6.3451e-05	0	0.796912	g__Clostridium_sp__CAG_306	0.895354
0.000176025	0	0.000115645	0	0.151484	g__Clostridium_sp__K4410_MGS_306	0.710973
0.0106035	0.00536877	0.0142314	0.00492871	0.729573	g__Collinsella	0.852284
0.000760109	0.000176025	0.0010408	0	0.0453201	g__Coprobacter	0.710973
0.00118617	0.000880127	0.00142355	0.000792114	0.807634	g__Coprococcus_1	0.902094
0.00568682	0.000176025	0.0042942	0.000176025	0.432533	g__Coprococcus_2	0.753736
0.00480469	0.00378454	0.00591732	0.00316846	0.782607	g__Coprococcus_3	0.881876
6.00086e-06	0	3.07021e-05	0	0.772277	g__Coriobacteriaceae_UCG_002	0.8754
0	0	4.91234e-05	0	0.313573	g__Coriobacteriaceae_UCG_003	0.748655
2.60037e-05	0	3.47957e-05	0	0.215897	g__Corynebacterium	0.710973
4.00058e-06	0	2.04681e-06	0	0.23331	g__Corynebacterium_1	0.718415
0	0	0	0		g__Criibacterium_bergeronii
2.00029e-06	0	0	0	0.164552	g__Cryptobacterium	0.710973
2.8004e-05	0	1.33042e-05	0	0.367138	g__Cuneatibacter	0.753736
0	0	2.04681e-06	0	0.479471	g__Cupriavidus	0.753736
0.000156022	0	0.00015044	0	0.56875	g__Defluviitaleaceae_UCG_011	0.801707
0	0	6.14042e-06	0	0.107791	g__Deinococcus	0.710973
1.4002e-05	0	0	0	0.164552	g__Denitrobacterium	0.710973
0	0	1.0234e-05	0	0.479471	g__Desulfitibacter	0.753736
0.00152422	0	0.00122501	0	0.227567	g__Desulfovibrio	0.718415
0.0048867	0	0.00604422	0	0.959732	g__Dialister	0.989568
2.60037e-05	0	1.94447e-05	0	0.583154	g__Dielma	0.808298
0	0	0	0		g__Dietzia
2.60037e-05	0	2.86553e-05	0	0.636781	g__DNF00809	0.813312
0.0112116	0.00800915	0.012507	0.0102975	0.424152	g__Dorea	0.753736
0.000366053	0	0.000567989	0.000176025	0.0457366	g__DTU089	0.710973
0.000134019	0	1.0234e-05	0	0.211606	g__Dysgonomonas	0.710973
0.000474068	8.80127e-05	0.000597667	0.000176025	0.541309	g__Eggerthella	0.781267
0	0	0	0		g__Eggerthia
0	0	1.0234e-06	0	0.479471	g__Eikenella	0.753736
0.000738106	0.000176025	0.000670329	0.000176025	0.533366	g__Eisenbergiella	0.780636
0	0	0	0		g__Elusimicrobium
5.00072e-05	0	4.19595e-05	0	0.986827	g__Enorma	0.989568
0.000670096	0	0.000183189	0	0.194095	g__Enterococcus	0.710973
0.000518075	0	0.00120045	0	0.848732	g__Enterorhabdus	0.921067
4.80069e-05	0	5.62872e-05	0	0.402235	g__Epulopiscium	0.753736
0	0	0	0		g__Eremococcus
0.00180626	0.000704101	0.00296685	0.000880127	0.200657	g__Erysipelatoclostridium	0.710973
0.00616489	0.00316846	0.00761514	0.00246435	0.424234	g__Erysipelotrichaceae_UCG_003	0.753736
2.00029e-06	0	1.0234e-06	0	0.632674	g__Erysipelotrichaceae_UCG_004	0.813312
0	0	2.04681e-06	0	0.313569	g__Erysipelotrichaceae_UCG_006	0.748655
2.00029e-06	0	0	0	0.164552	g__Erysipelotrichaceae_UCG_010	0.710973
0.0089933	0.00123218	0.00979499	0.00105615	0.637841	g__Escherichia_Shigella	0.813312
0	0	0	0		g__Ethanoligenens
3.40049e-05	0	0.000142253	0	0.187412	g__Eubacterium	0.710973
2.00029e-06	0	7.16382e-06	0	0.504953	g__Ezakiella	0.76242
0	0	2.04681e-06	0	0.479471	g__F0058	0.753736
1.20017e-05	0	1.94447e-05	0	0.547295	g__F0332	0.783021
0.0385576	0.0339729	0.0398442	0.035029	0.735271	g__Faecalibacterium	0.852292
0	0	4.09361e-06	0	0.215351	g__Faecalibaculum	0.710973
2.00029e-06	0	7.16382e-06	0	0.703828	g__Faecalicoccus	0.850015
0.000782113	0	0.000873986	0	0.819433	g__Faecalitalea	0.904179
0.00195428	0.00123218	0.00226377	0.0014082	0.821867	g__Family_XIII_AD3011_group	0.904179
0.000326047	0.000176025	0.000276319	0.000176025	0.400049	g__Family_XIII_UCG_001	0.753736
0	0	0	0		g__Fastidiosipila
0	0	0	0		g__Filifactor
1.20017e-05	0	6.14042e-06	0	0.167993	g__Finegoldia	0.710973
0	0	1.0234e-06	0	0.479471	g__Firmicutes_bacterium_CAG_822	0.753736
0	0	0	0		g__Flavobacterium
0.000494071	0.000176025	0.000642697	0.000176025	0.584173	g__Flavonifractor	0.808298
0	0	0	0		g__Flexilinea
0.000108016	0	0.000164768	0	0.374342	g__Fournierella	0.753736
0	0	0	0		g__Fretibacterium
0.0156002	0.0119697	0.0199205	0.0145221	0.14651	g__Fusicatenibacter	0.710973
0.000112016	0	0.000132019	0	0.269407	g__Fusobacterium	0.748655
0	0	1.0234e-06	0	0.479471	g__Gallicola	0.753736
0	0	2.04681e-06	0	0.313569	g__Gardnerella	0.748655
0.000446064	0.000176025	0.000372519	0.000176025	0.385575	g__GCA_900066225	0.753736
0.000708102	0.000264038	0.000748108	0.000352051	0.354222	g__GCA_900066575	0.753736
3.20046e-05	0	3.78659e-05	0	0.777391	g__GCA_900066755	0.87859
2.8004e-05	0	4.91234e-05	0	0.107862	g__Gemella	0.710973
2.00029e-06	0	0	0	0.164552	g__Geobacillus	0.710973
0	0	1.0234e-06	0	0.479471	g__Georgenia	0.753736
0	0	0	0		g__Glutamicibacter
0.000174025	0	0.000224125	0	0.49731	g__Gordonibacter	0.757063
8.00115e-06	0	4.09361e-06	0	0.329071	g__Granulicatella	0.753736
0.00306844	0.000264038	0.00296685	0.000176025	0.531924	g__gut_metagenome	0.780636
0.00317246	0.000176025	0.00305691	0.000176025	0.690445	g__Haemophilus	0.850015
2.00029e-06	0	0	0	0.164552	g__Hafnia_Obesumbacterium	0.710973
0	0	0	0		g__Halococcus
1.20017e-05	0	1.12574e-05	0	0.975905	g__Harryflintia	0.989568
0	0	0	0		g__Helcococcus
8.00115e-06	0	5.11702e-06	0	0.334905	g__Helicobacter	0.753736
0.00381855	0	0.00303848	0	0.249207	g__Holdemanella	0.734435
0.000172025	0	0.000179096	0	0.350651	g__Holdemania	0.753736
0.000190027	0	0.000164768	0	0.241944	g__Howardella	0.727736
0.000434063	0	0.000355121	0	0.108483	g__Hungatella	0.710973
0	0	0	0		g__Hydrogenispora
6.20089e-05	0	5.3217e-05	0	0.45697	g__Hydrogenoanaerobacterium	0.753736
0	0	0	0		g__Hymenobacter
1.4002e-05	0	0	0	0.164552	g__Incertae_Sedis	0.710973
0.00370053	0.000440063	0.00485912	0.00105615	0.580369	g__Intestinibacter	0.808298
0.000238034	0	0.000264038	0	0.438582	g__Intestinimonas	0.753736
0	0	0	0		g__iron_reducing_bacterium_enrichment_culture_clone_HN_HFO75
4.00058e-06	0	0	0	0.0482442	g__Johnsonella	0.710973
0	0	0	0		g__Jonquetella
0.00255437	0	0.00192707	0	0.55423	g__Klebsiella	0.789984
0	0	4.09361e-06	0	0.479471	g__Kocuria	0.753736
2.00029e-06	0	1.0234e-06	0	0.632674	g__Lachnoanaerobaculum	0.813312
0.00569682	0.00369653	0.00649349	0.00334448	0.989568	g__Lachnoclostridium	0.989568
0	0	0	0		g__Lachnoclostridium_10
0.00234034	0.00167224	0.00191888	0.000968139	0.0583435	g__Lachnospira	0.710973
0.000982141	0.000704101	0.000930273	0.000352051	0.0833241	g__Lachnospiraceae_FCS020_group	0.710973
0.00014002	0	0.000111551	0	0.499476	g__Lachnospiraceae_FE2018_group	0.757142
0.00411059	0.00246435	0.00347138	0.00176025	0.156872	g__Lachnospiraceae_ND3007_group	0.710973
2.00029e-06	0	3.27489e-05	0	0.700798	g__Lachnospiraceae_NK3A20_group	0.850015
0.00713703	0.00448865	0.00699803	0.00457666	0.897358	g__Lachnospiraceae_NK4A136_group	0.957516
0.000258037	0	0.000187283	0	0.253195	g__Lachnospiraceae_NK4B4_group	0.737037
0.000892128	0.000352051	0.00134578	0.000352051	0.650317	g__Lachnospiraceae_UCG_001	0.822587
6.80098e-05	0	7.26616e-05	0	0.249939	g__Lachnospiraceae_UCG_002	0.734435
7.20104e-05	0	9.92701e-05	0	0.691322	g__Lachnospiraceae_UCG_003	0.850015
0.000320046	8.80127e-05	0.000299857	0	0.268488	g__Lachnospiraceae_UCG_004	0.748655
0	0	1.0234e-06	0	0.479471	g__Lachnospiraceae_UCG_006	0.753736
0	0	9.21063e-05	0	0.479471	g__Lachnospiraceae_UCG_007	0.753736
7.00101e-05	0	0.000101317	0	0.744845	g__Lachnospiraceae_UCG_008	0.855112
0.000842121	0.000264038	0.000579246	0.000176025	0.127735	g__Lachnospiraceae_UCG_010	0.710973
0.000804116	0.000176025	0.00157809	0.000176025	0.888539	g__Lactobacillus	0.950762
0.000214031	0	0.000564919	0	0.394555	g__Lactococcus	0.753736
2.00029e-06	0	1.0234e-06	0	0.632674	g__Lautropia	0.813312
0	0	7.16382e-06	0	0.313573	g__Lawsonella	0.748655
4.00058e-06	0	1.12574e-05	0	0.577949	g__Leptotrichia	0.808298
1.20017e-05	0	3.47957e-05	0	0.0654521	g__Leuconostoc	0.710973
6.00086e-06	0	4.80999e-05	0	0.75123	g__Libanicoccus	0.859191
0	0	2.04681e-06	0	0.313569	g__Listeria	0.748655
2.00029e-06	0	0	0	0.164552	g__Mailhella	0.710973
0	0	2.04681e-06	0	0.479471	g__Marinilactibacillus	0.753736
0.000966139	0.000352051	0.000720476	0.000176025	0.0725321	g__Marvinbryantia	0.710973
0.000838121	0	5.73106e-05	0	0.0332607	g__Megamonas	0.710973
0.00267238	0	0.00170806	0	0.544024	g__Megasphaera	0.781267
0.000116017	0	9.41531e-05	0	0.190242	g__Merdibacter	0.710973
0.000490071	0	0.000579246	0	0.0738415	g__metagenome	0.710973
0.0105595	0.000264038	0.0111121	0.000176025	0.211023	g__Methanobrevibacter	0.710973
1.80026e-05	0	4.09361e-06	0	0.484553	g__Methanomassiliicoccus	0.755508
0.000388056	0	0.000849425	0	0.362059	g__Methanosphaera	0.753736
0	0	0	0		g__Methylobacillus
1.60023e-05	0	4.91234e-05	0	0.156104	g__Methylobacterium	0.710973
0	0	0	0		g__Micrococcus
2.40035e-05	0	1.33042e-05	0	0.400356	g__Mitsuokella	0.753736
0	0	4.09361e-06	0	0.215351	g__Mobiluncus	0.710973
0.000184026	0	0.000316232	0	0.563235	g__Mogibacterium	0.796873
0	0	1.0234e-06	0	0.479471	g__Morganella	0.753736
7.20104e-05	0	7.8802e-05	0	0.64987	g__Moryella	0.822587
6.00086e-06	0	0	0	0.0482458	g__Mucispirillum	0.710973
2.00029e-06	0	2.04681e-06	0	0.988724	g__Murdochiella	0.989568
4.00058e-06	0	1.22808e-05	0	0.758306	g__Muribaculum	0.864695
1.20017e-05	0	1.63745e-05	0	0.692872	g__Murimonas	0.850015
0	0	0	0		g__Mycobacterium
0	0	0	0		g__Mycoplasma
0	0	0	0		g__Myroides
0.0013742	0.000792114	0.00145426	0.000440063	0.167017	g__Negativibacillus	0.710973
0	0	0	0		g__Negativicoccus
1.4002e-05	0	2.45617e-05	0	0.379331	g__Neisseria	0.753736
0	0	0	0		g__Ochrobactrum
0.00470668	0.00167224	0.00327898	0.000880127	0.0286042	g__Odoribacter	0.710973
0	0	0	0		g__Oenococcus
0	0	0	0		g__Oikopleura_dioica
0	0	0	0		g__Oligoflexus
3.80055e-05	0	0.000104387	0	0.738504	g__Olsenella	0.852292
3.00043e-05	0	4.50297e-05	0	0.0345587	g__Oribacterium	0.710973
0.000986142	0.000704101	0.00110016	0.000528076	0.264879	g__Oscillibacter	0.748655
7.00101e-05	0	0.000100294	0	0.631228	g__Oscillospira	0.813312
1.4002e-05	0	2.14915e-05	0	0.712953	g__Ottowia	0.850015
0.00013602	0	0.000104387	0	0.724048	g__Oxalobacter	0.852284
0	0	0	0		g__Paenarthrobacter
2.40035e-05	0	1.22808e-05	0	0.101624	g__Paenibacillus	0.710973
2.8004e-05	0	0.00010234	0	0.638726	g__Paeniclostridium	0.813312
3.40049e-05	0	1.84213e-05	0	0.140508	g__Papillibacter	0.710973
0.0149342	0.0107375	0.0131149	0.00704101	0.0465948	g__Parabacteroides	0.710973
2.00029e-06	0	9.21063e-06	0	0.703829	g__Paraclostridium	0.850015
0	0	5.11702e-06	0	0.313573	g__Paraeggerthella	0.748655
0.00372254	0	0.00455721	0	0.714279	g__Paraprevotella	0.850015
4.00058e-06	0	0	0	0.0482442	g__Parascardovia	0.710973
0.00229033	0.000704101	0.00275807	0.000528076	0.288061	g__Parasutterella	0.748655
0	0	0	0		g__Parcubacteria_group_bacterium_GW2011_GWA2_42_14
0	0	0.000108481	0	0.107802	g__Parvibacter	0.710973
1.60023e-05	0	1.0234e-05	0	0.338194	g__Parvimonas	0.753736
4.00058e-06	0	2.04681e-06	0	0.494815	g__Pediococcus	0.757063
0	0	3.47957e-05	0	0.313573	g__Peptoclostridium	0.748655
0.000388056	0	0.000257898	0	0.143135	g__Peptococcus	0.710973
1.00014e-05	0	1.12574e-05	0	0.437064	g__Peptoniphilus	0.753736
6.00086e-06	0	7.16382e-06	0	0.969266	g__Peptostreptococcus	0.989568
0.0186687	0.0120577	0.0124446	0.00589685	0.0129305	g__Phascolarctobacterium	0.710973
0	0	0	0		g__Phocaeicola
5.00072e-05	0	6.75446e-05	0	0.461715	g__Phocea	0.753736
0	0	0	0		g__Phoenicibacter
0	0	0	0		g__Planctomicrobium
0	0	0	0		g__Porphyrobacter
4.00058e-06	0	0	0	0.0482442	g__Porphyromonadaceae_bacterium_C941	0.710973
0.000148021	0	2.55851e-05	0	0.139671	g__Porphyromonas	0.710973
3.80055e-05	0	0.000119738	0	0.54385	g__Prevotella	0.781267
0.000158023	0	6.24276e-05	0	0.679568	g__Prevotella_2	0.848349
1.20017e-05	0	1.43276e-05	0	0.950123	g__Prevotella_6	0.989568
0.00412659	0	0.000251757	0	0.136432	g__Prevotella_7	0.710973
0.0218131	0	0.0118162	0	0.208668	g__Prevotella_9	0.710973
0	0	0.000224125	0	0.313573	g__Prevotellaceae_Ga6A1_group	0.748655
0.00048607	0	0.00253906	0	0.23417	g__Prevotellaceae_NK3B31_group	0.718415
0.000996143	0	0.000735827	0	0.0181556	g__Prevotellaceae_UCG_001	0.710973
0	0	8.18723e-06	0	0.479471	g__Prevotellaceae_UCG_003	0.753736
1.4002e-05	0	2.86553e-05	0	0.516731	g__Proteus	0.773244
0	0	3.07021e-06	0	0.479471	g__Providencia	0.753736
5.00072e-05	0	5.73106e-05	0	0.200206	g__Pseudobutyrivibrio	0.710973
7.20104e-05	0	5.01468e-05	0	0.142006	g__Pseudoflavonifractor	0.710973
0.000698101	0.000352051	0.00153306	0.000352051	0.81629	g__Pseudomonas	0.904179
0	0	0	0		g__Pseudoramibacter
0	0	0	0		g__Psychrobacter
5.80084e-05	0	3.68425e-05	0	0.694415	g__Pygmaiobacter	0.850015
1.60023e-05	0	1.22808e-05	0	0.406008	g__Pyramidobacter	0.753736
8.00115e-06	0	8.18723e-06	0	0.34675	g__Ralstonia	0.753736
4.00058e-06	0	1.43276e-05	0	0.198923	g__Raoultibacter	0.710973
2.00029e-06	0	1.0234e-06	0	0.632674	g__Rhodobacter	0.813312
3.80055e-05	0	3.58191e-05	0	0.123778	g__Rikenella	0.710973
0.000238034	0	0.000124855	0	0.0787446	g__Rikenellaceae_RC9_gut_group	0.710973
0.00736106	0.00202429	0.0102842	0.00343249	0.153608	g__Romboutsia	0.710973
0.013916	0.00844922	0.012945	0.00704101	0.909795	g__Roseburia	0.962254
0.000106015	0	0.000118715	0	0.23752	g__Rothia	0.7201
0	0	9.21063e-06	0	0.479471	g__rumen_bacterium_YS2	0.753736
7.00101e-05	0	8.90361e-05	0	0.542974	g__Ruminiclostridium	0.781267
0.000268039	0	0.000180119	0	0.316066	g__Ruminiclostridium_1	0.749206
0.0048667	0.00316846	0.00657127	0.00387256	0.0633652	g__Ruminiclostridium_5	0.710973
0.00307244	0.000528076	0.00301085	0.000352051	0.364511	g__Ruminiclostridium_6	0.753736
0.00126418	0.000704101	0.00135601	0.000704101	0.728092	g__Ruminiclostridium_9	0.852284
0.00432862	0.00220032	0.00503207	0.000880127	0.268592	g__Ruminococcaceae_NK4A214_group	0.748655
0.0148321	0.00712903	0.0129931	0.00572082	0.146521	g__Ruminococcaceae_UCG_002	0.710973
0.000816118	0.000352051	0.000865799	0.000176025	0.180124	g__Ruminococcaceae_UCG_003	0.710973
0.00235434	0.00193628	0.00237737	0.0021123	0.66207	g__Ruminococcaceae_UCG_004	0.831943
0.00298243	0.00193628	0.00331173	0.00123218	0.172124	g__Ruminococcaceae_UCG_005	0.710973
2.8004e-05	0	2.35383e-05	0	0.497442	g__Ruminococcaceae_UCG_007	0.757063
0.000426061	0	0.000321349	0	0.728644	g__Ruminococcaceae_UCG_008	0.852284
7.80112e-05	0	0.000132019	0	0.692788	g__Ruminococcaceae_UCG_009	0.850015
0.00179026	0.000616089	0.00172341	0.000264038	0.165991	g__Ruminococcaceae_UCG_010	0.710973
1.60023e-05	0	4.09361e-06	0	0.0820195	g__Ruminococcaceae_UCG_011	0.710973
0.00439463	0.00316846	0.00406189	0.00272839	0.28123	g__Ruminococcaceae_UCG_013	0.748655
0.01382	0.00281641	0.0105472	0.00167224	0.0930731	g__Ruminococcaceae_UCG_014	0.710973
0	0	0	0		g__Ruminococcaceae_V9D2013_group
0.0156543	0.00827319	0.0103691	0.00607287	0.151716	g__Ruminococcus_1	0.710973
0.020925	0.0150502	0.0196831	0.00712903	0.121582	g__Ruminococcus_2	0.710973
2.00029e-06	0	3.07021e-06	0	0.709897	g__S5_A14a	0.850015
3.00043e-05	0	5.11702e-06	0	0.0131753	g__Sanguibacteroides	0.710973
0	0	4.09361e-06	0	0.313573	g__Sarcina	0.748655
0	0	4.09361e-06	0	0.313569	g__Scardovia	0.748655
0	0	0	0		g__Schrenkiella_parvula
0	0	0	0		g__Sedimentibacter
4.00058e-06	0	1.0234e-06	0	0.628583	g__Selenomonas	0.813312
2.00029e-06	0	5.11702e-06	0	0.703828	g__Selenomonas_3	0.850015
0	0	9.21063e-06	0	0.0774338	g__Selenomonas_4	0.710973
0.000290042	0	0.000667259	0	0.16896	g__Sellimonas	0.710973
0.000292042	0	0.000635533	0	0.658544	g__Senegalimassilia	0.830243
0.000240035	0	5.11702e-06	0	0.586506	g__Serratia	0.808298
0.000130019	0	0.000164768	0	0.21484	g__Shuttleworthia	0.710973
0.000304044	0	0.000731733	0	0.608333	g__Slackia	0.813312
0	0	0	0		g__Sneathia
0.000108016	0	6.24276e-05	0	0.360238	g__Solobacterium	0.753736
2.00029e-06	0	2.04681e-06	0	0.988724	g__Sphingobacterium	0.989568
0	0	3.07021e-06	0	0.215344	g__Sphingobium	0.710973
0	0	0	0		g__Sphingomonas
2.00029e-06	0	0	0	0.164552	g__Sporosarcina	0.710973
2.00029e-05	0	2.14915e-05	0	0.60671	g__Staphylococcus	0.813312
0	0	3.07021e-06	0	0.313573	g__Stenotrophomonas	0.748655
0	0	1.0234e-06	0	0.479471	g__Stomatobaculum	0.753736
0.0110676	0.00396057	0.0140073	0.00457666	0.413577	g__Streptococcus	0.753736
0.0180226	0.0151382	0.0234462	0.0190107	0.092193	g__Subdoligranulum	0.710973
0	0	1.0234e-06	0	0.479471	g__Succinatimonas	0.753736
0.00378454	0	0.000156581	0	0.359271	g__Succiniclasticum	0.753736
0.000886128	0	0.000562872	0	0.819303	g__Succinivibrio	0.904179
0.00191028	0	0.000849425	0	0.081641	g__Sutterella	0.710973
0	0	1.0234e-06	0	0.479471	g__Synechococcus_PCC_7942	0.753736
0	0	7.16382e-06	0	0.479471	g__Synergistes	0.753736
0	0	0	0		g__Syntrophaceticus
2.00029e-06	0	2.04681e-06	0	0.988724	g__Syntrophomonas	0.989568
0.00146821	0	0.00263731	0	0.959436	g__Terrisporobacter	0.989568
0	0	0	0		g__Tetrasphaera
0	0	0	0		g__Thermus
0	0	0	0		g__Tissierella
0	0	1.0234e-06	0	0.479471	g__TM7_phylum_sp__oral_clone_FR058	0.753736
0	0	1.0234e-06	0	0.479471	g__TM7_phylum_sp__oral_clone_HD027	0.753736
6.00086e-06	0	7.16382e-06	0	0.770163	g__Treponema_2	0.8754
2.00029e-06	0	0	0	0.164552	g__Trueperella	0.710973
0	0	0	0		g__Tumebacillus
0.0020943	0.000176025	0.00222078	0.000352051	0.827993	g__Turicibacter	0.904259
0.000432062	0	0.000746061	0	0.231068	g__Tyzzerella	0.718415
0.000180026	0	0.000202634	0	0.510072	g__Tyzzerella_3	0.767117
0.000854123	0	0.00112165	0	0.813823	g__Tyzzerella_4	0.904179
0.00115017	0.000440063	0.00103364	0.000528076	0.194503	g__UBA1819	0.710973
8.20118e-05	0	7.77786e-05	0	0.948186	g__UC5_1_2E3	0.989568
0	0	1.0234e-06	0	0.479471	g__un_c__Alphaproteobacteria	0.753736
0.000238034	0	0.000229242	0	0.936007	g__un_c__Clostridia	0.984999
0	0	0	0		g__un_c__Gammaproteobacteria
0	0	1.0234e-06	0	0.479471	g__un_f__A0839	0.753736
0	0	1.0234e-06	0	0.479471	g__un_f__Actinomycetaceae	0.753736
6.60095e-05	0	7.8802e-05	0	0.972704	g__un_f__Atopobiaceae	0.989568
4.80069e-05	0	7.26616e-05	0	0.957982	g__un_f__Barnesiellaceae	0.989568
0	0	0	0		g__un_f__Burkholderiaceae
0.000288041	8.80127e-05	0.000302927	0	0.805654	g__un_f__Christensenellaceae	0.902094
0	0	1.0234e-06	0	0.479471	g__un_f__Clostridiaceae_1	0.753736
0.000114016	0	0.000159651	0	0.82851	g__un_f__Clostridiales_vadinBB60_group	0.904259
0.000884127	0	0.000964046	0.000176025	0.738193	g__un_f__Coriobacteriales_Incertae_Sedis	0.852292
7.00101e-05	0	6.95914e-05	0	0.537551	g__un_f__Desulfovibrionaceae	0.781267
0.000860124	0.000176025	0.0012199	0.000176025	0.904187	g__un_f__Eggerthellaceae	0.959443
0	0	0	0		g__un_f__Enterobacteriaceae
0.000100014	0	9.21063e-05	0	0.0428574	g__un_f__Erysipelotrichaceae	0.710973
0	0	0	0		g__un_f__Family_XI
2.40035e-05	0	1.94447e-05	0	0.419408	g__un_f__Family_XIII	0.753736
0	0	0	0		g__un_f__Family_XIV
0	0	0	0		g__un_f__Family_XVIII
0.000154022	0	0.000100294	0	0.491451	g__un_f__Flavobacteriaceae	0.757063
0.00760109	0.00563281	0.0104991	0.0062489	0.23348	g__un_f__Lachnospiraceae	0.718415
6.00086e-06	0	0	0	0.164552	g__un_f__Methanomethylophilaceae	0.710973
0	0	0	0		g__un_f__Microbacteriaceae
0	0	0	0		g__un_f__Micrococcaceae
8.00115e-06	0	6.14042e-06	0	0.192795	g__un_f__Mitochondria	0.710973
0.00442064	0.000176025	0.00468616	0.000352051	0.618122	g__un_f__Muribaculaceae	0.813312
0	0	0	0		g__un_f__Neisseriaceae
0	0	0	0		g__un_f__Paludibacteraceae
2.20032e-05	0	0.000156581	0	0.968402	g__un_f__Pasteurellaceae	0.989568
0.000336048	0.000176025	0.000303951	0	0.533148	g__un_f__Peptococcaceae	0.780636
2.00029e-06	0	2.04681e-06	0	0.988724	g__un_f__Peptostreptococcaceae	0.989568
0.000578083	0	0.000287576	0	0.610251	g__un_f__Prevotellaceae	0.813312
6.00086e-06	0	4.09361e-06	0	0.719058	g__un_f__Puniceicoccaceae	0.850403
0	0	1.0234e-06	0	0.479471	g__un_f__Rikenellaceae	0.753736
0.00544878	0.00281641	0.00576381	0.00228833	0.311869	g__un_f__Ruminococcaceae	0.748655
1.4002e-05	0	3.07021e-06	0	0.179369	g__un_f__Saccharimonadaceae	0.710973
0	0	0	0		g__un_f__Steroidobacteraceae
4.00058e-06	0	1.0234e-06	0	0.229629	g__un_f__vadinBE97	0.718415
5.40078e-05	0	0.00068261	0	0.19969	g__un_f__Veillonellaceae	0.710973
3.20046e-05	0	0	0	0.164552	g__un_f__Victivallaceae	0.710973
0	0	2.04681e-06	0	0.479471	g__un_f__Weeksellaceae	0.753736
0	0	4.09361e-06	0	0.215351	g__un_k__Bacteria	0.710973
0.000448065	0	0.000122808	0	0.528426	g__un_o__Bacteroidales	0.780636
0	0	1.22808e-05	0	0.479471	g__un_o__Betaproteobacteriales	0.753736
0	0	2.04681e-06	0	0.313569	g__un_o__Chloroplast	0.748655
0.000288041	0	0.000355121	0	0.736919	g__un_o__Clostridiales	0.852292
6.40092e-05	0	0.000128949	0	0.706811	g__un_o__Coriobacteriales	0.850015
0	0	0	0		g__un_o__Gammaproteobacteria_Incertae_Sedis
0.000544078	0	0.000404244	0	0.4833	g__un_o__Gastranaerophilales	0.755508
8.20118e-05	0	0.00019854	0	0.975965	g__un_o__Izimaplasmatales	0.989568
0.00325847	0	0.0024531	0	0.127426	g__un_o__Mollicutes_RF39	0.710973
0	0	0	0		g__un_o__NB1_j
3.00043e-05	0	3.47957e-05	0	0.857223	g__un_o__Rhodospirillales	0.925887
0	0	1.0234e-06	0	0.479471	g__un_p__Firmicutes	0.753736
0	0	0	0		g__un_p__LCP_89
2.00029e-06	0	6.14042e-06	0	0.984966	g__unidentified	0.989568
0	0	0	0		g__Vagococcus
8.00115e-06	0	2.04681e-05	0	0.346382	g__Varibaculum	0.753736
0.00579683	0.000528076	0.00294331	0.000352051	0.148892	g__Veillonella	0.710973
0	0	1.0234e-06	0	0.479471	g__Verrucomicrobium	0.753736
0	0	4.09361e-06	0	0.215351	g__Vicia_faba__fava_bean_	0.710973
8.00115e-06	0	5.11702e-06	0	0.0919193	g__Victivallis	0.710973
0	0	0	0		g__W5053
0.000618089	0	9.00595e-05	0	0.598024	g__wallaby_gut_metagenome	0.813312
0.000570082	0	1.0234e-05	0	0.317726	g__Weissella	0.749206
0	0	0	0		g__Wolinella
0	0	0	0		g__XBB1006
0	0	0	0		g__Z20

## Sheet: Flemer_18AdnGenusWilcoxTest
Supplementary Table3. The Wilcoxon test results of the relative abundance of genera for the adenoma versus the normal within the each study.
Adenoma_mean	Adenoma_median	Normal_mean	Normal_median	pvalue	measures	FDR
0	0	0.00014353	0	0.303767	g__Bacteroides_pectinophilus_group	0.829029
8.4455e-05	0	8.04401e-05	0	0.311724	g__Clostridium_innocuum_group	0.829029
0.00010668	0	2.99679e-05	0	0.144296	g__Eubacterium_brachy_group	0.813304
0.00521398	0.00220027	0.00764339	0.00493839	0.0356032	g__Eubacterium_coprostanoligenes_group	0.722417
0.00204914	0.00068453	0.00233276	0.000831215	0.638573	g__Eubacterium_eligens_group	0.868235
4.445e-05	0	9.46354e-05	0	0.40868	g__Eubacterium_fissicatena_group	0.829029
0.0106369	0.00767651	0.0187378	0.0130061	0.0855358	g__Eubacterium_hallii_group	0.756879
5.334e-05	0	2.52361e-05	0	0.677218	g__Eubacterium_nodatum_group	0.887423
0.000493395	0.000244475	0.000514186	0.000342265	0.833571	g__Eubacterium_oxidoreducens_group	0.932376
0.00091567	0	0.00137379	0	0.179575	g__Eubacterium_ruminantium_group	0.814225
0	0	0	0		g__Eubacterium_saphenum_group
0.000706755	0.00039116	0.00143373	0.000635635	0.513015	g__Eubacterium_ventriosum_group	0.829029
0.00141351	0.00078232	0.00187694	0.000977899	0.24568	g__Eubacterium_xylanophilum_group	0.829029
0	0	0	0		g__Eubacterium_yurii_group
7.5565e-05	0	0.00011514	0	0.180624	g__Ruminococcus_gauvreauii_group	0.814225
0.00299148	4.8895e-05	0.0045977	0	0.706399	g__Ruminococcus_gnavus_group	0.890177
0.0072409	0.00699198	0.0108137	0.00767651	0.241969	g__Ruminococcus_torques_group	0.829029
0	0	4.73177e-06	0	0.407545	g__Abiotrophia	0.829029
4.445e-06	0	1.57726e-06	0	0.452513	g__Acetanaerobacterium	0.829029
0	0	5.36267e-05	0	0.135577	g__Acetitomaculum	0.792995
0	0	0	0		g__Acholeplasma
0	0	0	0		g__Acholeplasmatales_bacterium_canine_oral_taxon_316
0.00319595	0	4.8895e-05	0	0.158003	g__Acidaminococcus	0.814225
0	0	0	0		g__Acinetobacter
0	0	5.83585e-05	0	0.569623	g__Actinobacillus	0.829029
8.001e-05	0	6.78221e-05	0	0.892795	g__Actinomyces	0.951087
1.778e-05	0	3.15451e-06	0	0.0264533	g__Adlercreutzia	0.722417
0	0	0	0		g__Aegilops_tauschii
0	0	0.00598569	0	0.569623	g__Aeromonas	0.829029
0.0185267	0.0114414	0.0340293	0.0235185	0.109066	g__Agathobacter	0.756879
0	0	3.15451e-06	0	0.407511	g__Aggregatibacter	0.829029
0.036929	0.00141795	0.0303275	0.0039116	0.576226	g__Akkermansia	0.830837
0.0540423	0.0343732	0.0351492	0.0205359	0.17765	g__Alistipes	0.814225
7.112e-05	0	4.25859e-05	0	0.271545	g__Allisonella	0.829029
0	0	0.000531536	0	0.0279051	g__Alloprevotella	0.722417
0	0	3.15451e-06	0	0.407511	g__Alloscardovia	0.829029
0	0	0	0		g__Alysiella
0	0	3.15451e-06	0	0.407511	g__Anaerococcus	0.829029
1.778e-05	0	1.73498e-05	0	0.778999	g__Anaerofilum	0.908056
0	0	0	0		g__Anaerofustis
0	0	0	0		g__Anaeroglobus
4.445e-06	0	0.000582008	0	0.251617	g__Anaeroplasma	0.829029
0	0	2.05043e-05	0	0.407545	g__Anaerosporobacter	0.829029
0.0130638	0.013495	0.0139934	0.00831215	0.878699	g__Anaerostipes	0.951087
4.8895e-05	0	3.31224e-05	0	0.623891	g__Anaerotruncus	0.859583
3.1115e-05	0	2.20816e-05	0	0.777526	g__Angelakisella	0.908056
8.89e-06	0	3.15451e-06	0	0.452513	g__Asaccharobacter	0.829029
0	0	1.57726e-06	0	0.569623	g__Asaccharospora	0.829029
0.0204248	0	9.62127e-05	0	0.0663598	g__Asteroleplasma	0.737354
0	0	6.30903e-06	0	0.407511	g__Atopobium	0.829029
0.000760095	0	0.0016782	0	0.212442	g__Azospirillum_sp__47_25	0.829029
1.778e-05	0	1.10408e-05	0	0.681632	g__Bacteroidales_bacterium_55_9	0.887423
0	0	0	0		g__Bacteroidales_genomosp__P4_oral_clone_MB2_G17
0.186779	0.161696	0.149642	0.135341	0.23193	g__Bacteroides	0.829029
0.0166599	0.0118326	0.0103531	0.00327596	0.0334863	g__Barnesiella	0.722417
0	0	0	0		g__Bergeyella
0.013775	0.0112947	0.0178419	0.00528066	0.409806	g__Bifidobacterium	0.829029
0.00156464	0.00117348	0.00119398	0.00068453	0.261734	g__Bilophila	0.829029
0.0650214	0.0593585	0.0897302	0.0588207	0.695288	g__Blautia	0.887423
0	0	1.57726e-06	0	0.569623	g__Bulleidia	0.829029
0.00150241	0.00132016	0.00226336	0.00156464	0.157089	g__Butyricicoccus	0.814225
0.00159131	0.00088011	0.00125076	0.000537845	0.54619	g__Butyricimonas	0.829029
5.7785e-05	0	0.00232961	0	0.06668	g__Butyrivibrio	0.737354
0	0	0	0		g__Butyrivibrio_2
0.00108013	0	0.000621439	0	0.602293	g__CAG_352	0.848686
0.00404495	0.00210248	0.00475385	0.0029337	0.25859	g__CAG_56	0.829029
0.000235585	0	3.78542e-05	0	0.763715	g__CAG_873	0.908056
4.445e-06	0	2.05043e-05	0	0.737658	g__Campylobacter	0.908056
0	0	0	0		g__candidate_division_SR1_bacterium_MGEHA
0	0	0	0		g__candidate_division_SR1_bacterium_taxon_345
0	0	0	0		g__candidate_division_TM7_single_cell_isolate_TM7a
0	0	0	0		g__Candidatus_Melainabacteria_bacterium_MEL_A1
0	0	0	0		g__Candidatus_Saccharibacteria_oral_taxon_TM7x
0	0	0	0		g__Candidatus_Saccharimonas
8.001e-05	0	0.000116717	0	0.543798	g__Candidatus_Soleaferrea	0.829029
4.445e-06	0	4.73177e-06	0	0.464219	g__Capnocytophaga	0.829029
8.4455e-05	0	0.000148262	0	0.70017	g__Caproiciproducens	0.887423
4.445e-06	0	0	0	0.0986023	g__Cardiobacterium	0.756879
2.667e-05	0	6.30903e-06	0	0.434499	g__Catabacter	0.829029
0.00380492	0	0.00246368	0	0.540174	g__Catenibacterium	0.829029
0	0	1.73498e-05	0	0.407545	g__Catenisphaera	0.829029
0	0	0	0		g__Catonella
4.445e-06	0	4.73177e-05	0	0.934084	g__Cellulosilyticum	0.97597
0	0	0	0		g__CHKCI001
0	0	3.15451e-06	0	0.407511	g__CHKCI002	0.829029
0.0124904	0.00283591	0.0232835	0.0155486	0.0808173	g__Christensenellaceae_R_7_group	0.756879
7.5565e-05	0	0.000905346	0	0.320169	g__Citrobacter	0.829029
3.556e-05	0	2.52361e-05	0	0.576025	g__Cloacibacillus	0.830837
0	0	0	0		g__Clostridiales_bacterium_canine_oral_taxon_162
0.00089789	0	0.000807556	0	0.71257	g__Clostridiales_bacterium_enrichment_culture_clone_06_1235251_67	0.894319
4.445e-06	0	1.26181e-05	0	0.728335	g__Clostridioides	0.908056
0.00241363	0.00161353	0.00869226	0.00234696	0.231443	g__Clostridium_sensu_stricto_1	0.829029
0	0	4.73177e-06	0	0.569623	g__Clostridium_sensu_stricto_13	0.829029
0	0	0	0		g__Clostridium_sensu_stricto_2
3.1115e-05	0	8.83264e-05	0	0.2885	g__Clostridium_sp__CAG_306	0.829029
0.00113792	0	0.000301256	0	0.271829	g__Clostridium_sp__K4410_MGS_306	0.829029
0.00192913	0.00127127	0.00172552	0.00117348	0.779211	g__Collinsella	0.908056
0	0	0	0		g__Comamonas
2.667e-05	0	1.41953e-05	0	0.784903	g__Coprobacillus	0.908056
0.00065786	9.77899e-05	0.000735002	0.00019558	0.504588	g__Coprobacter	0.829029
0.00152463	0.00127127	0.00197946	0.00176022	0.208397	g__Coprococcus_1	0.829029
0.003596	0.000831215	0.00417815	0.0019069	0.210291	g__Coprococcus_2	0.829029
0.00470725	0.00308038	0.00552986	0.00469392	0.206968	g__Coprococcus_3	0.829029
0	0	0	0		g__Coriobacteriaceae_UCG_002
0	0	1.10408e-05	0	0.569623	g__Coriobacteriaceae_UCG_003	0.829029
2.2225e-05	0	1.57726e-06	0	0.0237582	g__Corynebacterium	0.722417
0	0	0	0		g__Corynebacterium_1
0	0	0	0		g__Coxiella
0	0	0	0		g__Criibacterium_bergeronii
0	0	0	0		g__Cryptobacterium
0	0	0	0		g__Cuneatibacter
0	0	0	0		g__Cutibacterium
4.0005e-05	0	7.88629e-05	0	0.310214	g__Defluviitaleaceae_UCG_011	0.829029
0	0	3.15451e-06	0	0.569623	g__Dehalobacterium	0.829029
0	0	0	0		g__Delftia
0	0	0	0		g__Desulfobulbus
0.00260477	0.000146685	0.0019763	9.77899e-05	0.991507	g__Desulfovibrio	0.997946
0.00385826	4.8895e-05	0.00393999	0.000146685	0.825227	g__Dialister	0.926885
2.667e-05	0	9.46354e-06	0	0.673332	g__Dielma	0.887423
1.778e-05	0	1.10408e-05	0	0.86514	g__DNF00809	0.944343
0.00818324	0.00552513	0.0108705	0.00733425	0.0892922	g__Dorea	0.756879
0.00033782	0.000146685	0.000159303	0	0.0675699	g__DTU089	0.737354
0.000102235	0	7.72856e-05	0	0.509095	g__Eggerthella	0.829029
4.445e-06	0	1.57726e-06	0	0.452513	g__Eikenella	0.829029
0.000404495	9.77899e-05	0.000329647	0	0.0464887	g__Eisenbergiella	0.722417
5.7785e-05	0	0.000433746	0	0.3106	g__Enterobacter	0.829029
1.3335e-05	0	0.000211352	0	0.215314	g__Enterococcus	0.829029
8.4455e-05	0	8.99037e-05	0	0.65655	g__Enterorhabdus	0.884916
4.445e-06	0	2.68134e-05	0	0.342601	g__Epulopiscium	0.829029
0.0001778	9.77899e-05	0.000201889	0	0.11921	g__Erysipelatoclostridium	0.756879
0.0018669	0.00136906	0.00232015	0.00068453	0.918596	g__Erysipelotrichaceae_UCG_003	0.968588
1.3335e-05	0	0.000359615	0	0.587343	g__Erysipelotrichaceae_UCG_004	0.839061
0.0042183	0.00039116	0.0143199	0.00048895	0.616304	g__Escherichia_Shigella	0.859583
1.3335e-05	0	2.83906e-05	0	0.787958	g__Eubacterium	0.908056
0	0	4.73177e-06	0	0.407545	g__Ezakiella	0.829029
0	0	0	0		g__F0058
0	0	4.73177e-06	0	0.303673	g__F0332	0.829029
0.0639635	0.0631723	0.072934	0.0685019	0.787466	g__Faecalibacterium	0.908056
0	0	1.57726e-06	0	0.569623	g__Faecalicoccus	0.829029
2.2225e-05	0	1.26181e-05	0	0.840185	g__Faecalitalea	0.932376
0.00140906	0.000537845	0.00171921	0.000977899	0.152379	g__Family_XIII_AD3011_group	0.814225
0.00048895	0.00039116	0.00051734	0.00039116	0.951043	g__Family_XIII_UCG_001	0.979105
0	0	0	0		g__Faucicola
8.89e-06	0	7.88629e-06	0	0.978002	g__FD2005	0.994035
0	0	0	0		g__Filifactor
0	0	0	0		g__Finegoldia
0	0	7.25538e-05	0	0.135547	g__Firmicutes_bacterium_CAG_345	0.792995
0.00030226	0.000146685	0.000274443	9.77899e-05	0.18911	g__Flavonifractor	0.814225
0.00045339	4.8895e-05	0.000848564	9.77899e-05	0.143263	g__Fournierella	0.813304
4.445e-06	0	0	0	0.0986023	g__Fretibacterium	0.756879
0.0189224	0.0137395	0.0184034	0.013495	0.814984	g__Fusicatenibacter	0.91871
4.445e-05	0	0.00037381	0	0.520743	g__Fusobacterium	0.829029
0.00011557	0	0.000274443	9.77899e-05	0.101621	g__GCA_900066225	0.756879
0.000368935	0.00029337	0.000351728	0.000244475	0.75817	g__GCA_900066575	0.908056
4.445e-06	0	1.57726e-06	0	0.452513	g__GCA_900066755	0.829029
0	0	6.30903e-06	0	0.407545	g__Gemella	0.829029
3.1115e-05	0	2.68134e-05	0	0.66053	g__Gordonibacter	0.886425
0	0	0	0		g__Gracilibacteria_bacterium_oral_taxon_871
0	0	0	0		g__Gracilibacteria_bacterium_oral_taxon_872
0	0	0	0		g__Gracilibacteria_bacterium_oral_taxon_873
1.3335e-05	0	2.36589e-05	0	0.842146	g__Granulicatella	0.932376
0.0064008	0.00127127	0.00352675	0.000635635	0.416304	g__gut_metagenome	0.829029
0.00359156	0.000146685	0.000815442	0.00019558	0.946032	g__Haemophilus	0.979105
4.0005e-05	0	0.000410087	0	0.600228	g__Hafnia_Obesumbacterium	0.848686
2.667e-05	0	5.36267e-05	0	0.756859	g__Halomonas	0.908056
0	0	0	0		g__Harryflintia
0.00219583	0	0.00296682	0	0.633159	g__Holdemanella	0.864667
0.000137795	0	8.20174e-05	0	0.544444	g__Holdemania	0.829029
0.000137795	0	0.000253938	0	0.799227	g__Howardella	0.910884
0.00020447	0	0.000164035	9.77899e-05	0.36404	g__Hungatella	0.829029
4.445e-05	0	8.99037e-05	0	0.119636	g__Hydrogenoanaerobacterium	0.756879
0	0	0	0		g__Hydrotalea
0.00307149	0.00136906	0.00655824	0.00107569	0.645029	g__Intestinibacter	0.873183
0.00128905	0.00058674	0.00129335	0.00078232	0.861776	g__Intestinimonas	0.944343
0	0	0	0		g__Johnsonella
0	0	0	0		g__Jonquetella
0	0	1.57726e-06	0	0.569623	g__Kingella	0.829029
0.000546735	0	0.00315767	0	0.374639	g__Klebsiella	0.829029
0	0	0	0		g__Kluyvera
0	0	1.57726e-06	0	0.569623	g__Lachnoanaerobaculum	0.829029
0.00488505	0.00210248	0.00399835	0.00166243	0.628697	g__Lachnoclostridium	0.862372
4.445e-06	0	1.57726e-06	0	0.452513	g__Lachnoclostridium_5	0.829029
0.0019958	0.00078232	0.00264191	0.00136906	0.3564	g__Lachnospira	0.829029
0	0	1.57726e-06	0	0.569623	g__Lachnospiraceae_AC2044_group	0.829029
0.00144462	0.00132016	0.00228545	0.00215138	0.027188	g__Lachnospiraceae_FCS020_group	0.722417
0.000226695	0.00019558	0.000367501	0.00019558	0.246295	g__Lachnospiraceae_NC2004_group	0.829029
0.00352044	0.00273812	0.00566235	0.00444944	0.0203294	g__Lachnospiraceae_ND3007_group	0.722417
0.00738314	0.00552513	0.00946354	0.00718756	0.42152	g__Lachnospiraceae_NK4A136_group	0.829029
4.0005e-05	0	3.46997e-05	0	0.945279	g__Lachnospiraceae_NK4B4_group	0.979105
0.000413385	9.77899e-05	0.00175864	0.000929004	0.00483087	g__Lachnospiraceae_UCG_001	0.49919
2.2225e-05	0	0.00126338	0	0.00341898	g__Lachnospiraceae_UCG_003	0.49919
0.00126682	0.00102679	0.00146685	0.000977899	0.400721	g__Lachnospiraceae_UCG_004	0.829029
0.00109791	0.00088011	0.00127916	0.00117348	0.153655	g__Lachnospiraceae_UCG_008	0.814225
0.00105346	0.00058674	0.000791783	0.00019558	0.328172	g__Lachnospiraceae_UCG_010	0.829029
0.00801433	0	0.00234538	0	0.757472	g__Lactobacillus	0.908056
4.445e-06	0	9.46354e-06	0	0.584295	g__Lactococcus	0.838571
8.89e-06	0	3.15451e-06	0	0.275981	g__Lactonifactor	0.829029
0	0	4.73177e-06	0	0.569623	g__Lautropia	0.829029
2.667e-05	0	1.41953e-05	0	0.989001	g__Leptotrichia	0.997946
0	0	0	0		g__Leuconostoc
2.667e-05	0	3.94314e-05	0	0.807056	g__Libanicoccus	0.916437
0	0	6.93993e-05	0	0.061925	g__Mailhella	0.737354
0.000484505	0.00029337	0.000951086	0.000733425	0.0351466	g__Marvinbryantia	0.722417
0.0105124	0	0.00385955	0	0.178843	g__Megamonas	0.814225
0.000262255	0	0.000570967	0	0.318493	g__Megasphaera	0.829029
1.3335e-05	0	4.73177e-06	0	0.456585	g__Merdibacter	0.829029
0.00116459	0	0.000462136	0	0.600025	g__metagenome	0.848686
0.000360045	0	0.000380119	0	0.621322	g__Methanobrevibacter	0.859583
3.556e-05	0	4.25859e-05	0	0.775409	g__Methanosphaera	0.908056
6.6675e-05	0	2.99679e-05	0	0.794486	g__Mitsuokella	0.910884
0	0	0	0		g__Mobiluncus
7.5565e-05	0	0.000238166	0	0.311187	g__Mogibacterium	0.829029
0.000102235	0	9.46354e-05	0	0.885444	g__Moryella	0.951087
0	0	0	0		g__Mycoplasma
0.00023114	9.77899e-05	0.000364346	0.00019558	0.186365	g__Negativibacillus	0.814225
0	0	1.41953e-05	0	0.135507	g__Neisseria	0.792995
0.00211582	0.00171132	0.00137537	0.00088011	0.0713568	g__Odoribacter	0.737354
8.89e-05	0	0.000130912	0	0.43687	g__Olsenella	0.829029
0	0	0.00016088	0	0.176341	g__Oribacterium	0.814225
0	0	4.73177e-06	0	0.569623	g__Oryza_sativa_Japonica_Group__Japanese_rice_	0.829029
0.00132016	0.00107569	0.00100156	0.00068453	0.412031	g__Oscillibacter	0.829029
0.000280035	0.000146685	0.000211352	9.77899e-05	0.929617	g__Oscillospira	0.97597
6.6675e-05	0	6.62448e-05	0	0.503195	g__Oxalobacter	0.829029
0	0	0	0		g__Paenibacillus
0	0	0.000159303	0	0.230426	g__Paeniclostridium	0.829029
1.778e-05	0	2.20816e-05	0	0.54887	g__Papillibacter	0.829029
0.00770318	0.0038627	0.00309931	0.00171132	0.0267347	g__Parabacteroides	0.722417
0.00277368	0	0.00102522	0	0.221836	g__Paraprevotella	0.829029
0	0	0	0		g__Parascardovia
0.00130683	0	0.00148104	9.77899e-05	0.128455	g__Parasutterella	0.792995
4.445e-06	0	1.57726e-05	0	0.56888	g__Parvimonas	0.829029
0	0	0	0		g__Peptoanaerobacter
7.112e-05	0	0.00024132	0	0.0555888	g__Peptococcus	0.737354
0	0	0	0		g__Peptoniphilus
3.1115e-05	0	1.41953e-05	0	1	g__Peptostreptococcus	1
0.0117704	0.00606298	0.00597938	0.00180911	0.259397	g__Phascolarctobacterium	0.829029
0	0	0	0		g__Phocaeicola
6.6675e-05	0	4.41632e-05	0	0.182644	g__Phocea	0.814225
0	0	3.15451e-06	0	0.569623	g__Phoenicibacter	0.829029
0	0	0	0		g__Porphyromonadaceae_bacterium_C941
4.445e-06	0	2.68134e-05	0	0.43222	g__Porphyromonas	0.829029
8.89e-06	0	1.89271e-05	0	0.754303	g__Prevotella	0.908056
0	0	0	0		g__Prevotella_1
0.0151352	0	0.00266399	0	0.855415	g__Prevotella_2	0.943696
1.3335e-05	0	7.88629e-06	0	0.989001	g__Prevotella_6	0.997946
0.00639191	0	0.00272708	0	0.113562	g__Prevotella_7	0.756879
0.073258	4.8895e-05	0.0570336	9.77899e-05	0.688612	g__Prevotella_9	0.887423
0.0010179	0	0	0	0.0986023	g__Prevotellaceae_Ga6A1_group	0.756879
0.00113792	0	0.0011719	0	0.254463	g__Prevotellaceae_NK3B31_group	0.829029
0	0	0.000252361	0	0.303767	g__Prevotellaceae_UCG_001	0.829029
0	0	6.78221e-05	0	0.569623	g__Prevotellaceae_UCG_003	0.829029
0	0	0	0		g__Prevotellaceae_UCG_004
0	0	0	0		g__Propionibacterium
0	0	0	0		g__Propionivibrio
0	0	0	0		g__Proteus
1.778e-05	0	0	0	0.0986023	g__Pseudomonas	0.756879
0	0	1.57726e-06	0	0.569623	g__Pseudopropionibacterium	0.829029
0	0	0	0		g__Pseudoramibacter
0	0	6.30903e-06	0	0.303744	g__Pygmaiobacter	0.829029
0	0	1.57726e-06	0	0.569623	g__Raoultibacter	0.829029
4.445e-06	0	3.15451e-06	0	0.787918	g__Rikenella	0.908056
0.0221494	0	0.0180817	0	0.798975	g__Rikenellaceae_RC9_gut_group	0.910884
0.00470281	0.00239585	0.0101938	0.00312928	0.914827	g__Romboutsia	0.967905
0.0130194	0.00860552	0.0143767	0.0112458	0.621694	g__Roseburia	0.859583
2.2225e-05	0	5.04722e-05	0	0.282812	g__Rothia	0.829029
2.2225e-05	0	3.15451e-05	0	0.957411	g__Ruminiclostridium	0.979105
1.778e-05	0	2.83906e-05	0	0.904589	g__Ruminiclostridium_1	0.960351
0.00194246	0.00171132	0.00221289	0.00117348	0.267035	g__Ruminiclostridium_5	0.829029
0.001778	0.00019558	0.00399519	0.000977899	0.0410903	g__Ruminiclostridium_6	0.722417
0.00136906	0.00112458	0.00147158	0.00112458	0.935042	g__Ruminiclostridium_9	0.97597
0.00177355	0.00078232	0.00381854	0.00224917	0.0563507	g__Ruminococcaceae_NK4A214_group	0.737354
0.0303993	0.0147663	0.0334158	0.0204381	0.381584	g__Ruminococcaceae_UCG_002	0.829029
0.00287147	0.0019558	0.00449203	0.00264033	0.192603	g__Ruminococcaceae_UCG_003	0.817902
0.0005334	9.77899e-05	0.000537845	0	0.696849	g__Ruminococcaceae_UCG_004	0.887423
0.00525399	0.00151574	0.00844779	0.00523176	0.0796722	g__Ruminococcaceae_UCG_005	0.756879
1.3335e-05	0	1.26181e-05	0	0.696798	g__Ruminococcaceae_UCG_007	0.887423
4.8895e-05	0	0.000279175	0	0.111314	g__Ruminococcaceae_UCG_008	0.756879
8.89e-05	0	0.000121449	0	0.863061	g__Ruminococcaceae_UCG_009	0.944343
0.00233362	0	0.00358511	0.00117348	0.0620002	g__Ruminococcaceae_UCG_010	0.737354
4.445e-05	0	1.41953e-05	0	0.330861	g__Ruminococcaceae_UCG_011	0.829029
0.00138684	0.00136906	0.00224917	0.00185801	0.102201	g__Ruminococcaceae_UCG_013	0.756879
0.00214249	0.00048895	0.00383589	0.00171132	0.06985	g__Ruminococcaceae_UCG_014	0.737354
4.445e-06	0	9.46354e-06	0	0.737651	g__Ruminococcaceae_V9D2013_group	0.908056
0.00846328	0.00757872	0.0104777	0.00870331	0.46657	g__Ruminococcus_1	0.829029
0.00696087	0.0048406	0.00826167	0.0058185	0.8907	g__Ruminococcus_2	0.951087
0	0	1.57726e-06	0	0.569623	g__S5_A14a	0.829029
1.778e-05	0	4.73177e-05	0	0.232502	g__Sanguibacteroides	0.829029
4.445e-06	0	1.57726e-06	0	0.452513	g__Sarcina	0.829029
0	0	0	0		g__Scardovia
0	0	4.73177e-06	0	0.569623	g__Sedimentibacter	0.829029
0	0	0	0		g__Selenomonas
0	0	4.73177e-06	0	0.407545	g__Selenomonas_3	0.829029
0	0	0	0		g__Selenomonas_4
0.000208915	0	0.000358037	0	0.701351	g__Sellimonas	0.887423
0.000217805	0	0.0004716	0	0.162271	g__Senegalimassilia	0.814225
8.89e-06	0	1.89271e-05	0	0.775389	g__Shewanella	0.908056
0.00034671	9.77899e-05	0.000588317	0.00039116	0.0406054	g__Shuttleworthia	0.722417
0	0	0	0		g__Simonsiella
2.667e-05	0	0.000130912	0	0.0406932	g__Slackia	0.722417
4.445e-05	0	9.77899e-05	0	0.498505	g__Solobacterium	0.829029
0	0	6.30903e-06	0	0.407545	g__SP3_e08	0.829029
0	0	0	0		g__Staphylococcus
8.89e-06	0	1.57726e-06	0	0.441039	g__Stomatobaculum	0.829029
0	0	0	0		g__Streptobacillus
0.00870775	0.00078232	0.00988309	0.00185801	0.31096	g__Streptococcus	0.829029
0	0	0	0		g__Streptococcus_sp__oral_clone_ASCB12
0.0223183	0.0138373	0.0247298	0.0187757	0.389924	g__Subdoligranulum	0.829029
0.00285813	0	0.00123972	0	0.684019	g__Succiniclasticum	0.887423
0	0	0.00445891	0	0.303767	g__Succinivibrio	0.829029
0.0121526	0.0102679	0.00420812	0.000831215	0.000164937	g__Sutterella	0.0511304
0	0	1.57726e-06	0	0.569623	g__Synergistes	0.829029
0	0	1.57726e-06	0	0.569623	g__Tannerella	0.829029
7.112e-05	0	0.000331224	0	0.0987416	g__Terrisporobacter	0.756879
0	0	0	0		g__TM7_phylum_sp__canine_oral_taxon_237
0	0	3.15451e-06	0	0.569623	g__TM7_phylum_sp__oral_clone_FR058	0.829029
0	0	0	0		g__Treponema_2
0	0	0	0		g__Triticum_aestivum__bread_wheat_
0.0001778	0	0.00110408	4.8895e-05	0.256951	g__Turicibacter	0.829029
0.000111125	0	5.20495e-05	0	0.881888	g__Tyzzerella	0.951087
0.000760095	0	0.000835946	0	0.362893	g__Tyzzerella_3	0.829029
0.000146685	0	0.000335956	0	0.321351	g__Tyzzerella_4	0.829029
0.000191135	9.77899e-05	0.000242898	9.77899e-05	0.680474	g__UBA1819	0.887423
4.445e-06	0	2.05043e-05	0	0.347612	g__UC5_1_2E3	0.829029
0	0	9.46354e-06	0	0.569623	g__un_c__Alphaproteobacteria	0.829029
0	0	0	0		g__un_c__Bacilli
8.89e-06	0	3.15451e-06	0	0.763704	g__un_c__Bacteroidia	0.908056
4.445e-06	0	1.57726e-06	0	0.452513	g__un_c__Coriobacteriia	0.829029
0	0	1.57726e-06	0	0.569623	g__un_c__Gammaproteobacteria	0.829029
0	0	4.73177e-06	0	0.569623	g__un_c__Mollicutes	0.829029
0.00144462	0	1.57726e-06	0	0.441039	g__un_c__Verrucomicrobiae	0.829029
4.445e-06	0	6.30903e-06	0	0.956022	g__un_f__Acidaminococcaceae	0.979105
0	0	0	0		g__un_f__Actinomycetaceae
0	0	1.57726e-06	0	0.569623	g__un_f__Atopobiaceae	0.829029
0	0	0.000648253	0	0.569623	g__un_f__Bacteroidales_RF16_group	0.829029
0.000475615	0	0.000231857	0	0.274259	g__un_f__Barnesiellaceae	0.829029
8.89e-06	0	1.57726e-06	0	0.109983	g__un_f__Burkholderiaceae	0.756879
0.000128905	0	0.000345419	9.77899e-05	0.112816	g__un_f__Christensenellaceae	0.756879
4.445e-06	0	5.5204e-05	0	0.117907	g__un_f__Clostridiaceae_1	0.756879
0.0042672	4.8895e-05	0.00166874	9.77899e-05	0.6925	g__un_f__Clostridiales_vadinBB60_group	0.887423
0	0	3.15451e-06	0	0.569623	g__un_f__Coriobacteriaceae	0.829029
0.00037338	0.000244475	0.000362769	0	0.171715	g__un_f__Coriobacteriales_Incertae_Sedis	0.814225
3.1115e-05	0	7.57083e-05	0	0.0461738	g__un_f__Desulfovibrionaceae	0.722417
0.00024003	0	0.000217661	0	0.879724	g__un_f__Eggerthellaceae	0.951087
0	0	6.30903e-06	0	0.303744	g__un_f__Enterobacteriaceae	0.829029
9.33449e-05	0	6.62448e-05	0	0.422171	g__un_f__Erysipelotrichaceae	0.829029
5.7785e-05	0	2.52361e-05	0	0.620773	g__un_f__Family_XIII	0.859583
6.6675e-05	0	0.000320183	0	0.147161	g__un_f__Flavobacteriaceae	0.814225
0	0	0	0		g__un_f__Fusobacteriaceae
0	0	0	0		g__un_f__Gracilibacteraceae
0.0201625	0.0198514	0.0284017	0.0248875	0.0570972	g__un_f__Lachnospiraceae	0.737354
0	0	0	0		g__un_f__Leptotrichiaceae
0	0	6.30903e-06	0	0.569623	g__un_f__Methanomethylophilaceae	0.829029
0	0	4.73177e-06	0	0.407545	g__un_f__Mitochondria	0.829029
0.00567626	0	0.000872223	0	0.186321	g__un_f__Muribaculaceae	0.814225
0	0	0	0		g__un_f__Neisseriaceae
0	0	0	0		g__un_f__P5D1_392
4.8895e-05	0	3.15451e-06	0	0.252554	g__un_f__Pasteurellaceae	0.829029
5.7785e-05	0	3.78542e-05	0	0.743112	g__un_f__Peptococcaceae	0.908056
0.000120015	0	8.83264e-05	0	0.387382	g__un_f__Peptostreptococcaceae	0.829029
6.6675e-05	0	0.00115613	0	0.293477	g__un_f__Prevotellaceae	0.829029
0.00084455	0	0.000435323	0	0.419024	g__un_f__Puniceicoccaceae	0.829029
2.667e-05	0	2.83906e-05	0	0.960155	g__un_f__Rikenellaceae	0.979105
0.00536956	0.00215138	0.0078437	0.0039116	0.323656	g__un_f__Ruminococcaceae	0.829029
0	0	1.57726e-06	0	0.569623	g__un_f__Saccharimonadaceae	0.829029
0	0	0	0		g__un_f__Succinivibrionaceae
0	0	3.15451e-06	0	0.569623	g__un_f__Syntrophomonadaceae	0.829029
0	0	0	0		g__un_f__Tannerellaceae
0.000226695	0	0.000422705	0	0.763301	g__un_f__vadinBE97	0.908056
0	0	3.15451e-06	0	0.407511	g__un_f__Veillonellaceae	0.829029
0.00010668	0	5.99358e-05	0	0.0466075	g__un_f__Victivallaceae	0.722417
0	0	0	0		g__un_f__Weeksellaceae
0.000182245	0	9.77899e-05	0	0.84097	g__un_k__Bacteria	0.932376
0.000786765	0.00019558	0.00033911	0	0.0222936	g__un_o__Bacteroidales	0.722417
0	0	0	0		g__un_o__Betaproteobacteriales
8.89e-06	0	4.73177e-05	0	0.49496	g__un_o__Chloroplast	0.829029
0.00131127	0.000929004	0.00109619	0.000929004	0.691028	g__un_o__Clostridiales	0.887423
8.89e-06	0	9.46354e-06	0	0.775383	g__un_o__Coriobacteriales	0.908056
0.00012446	0	0.000102522	0	1	g__un_o__DTU014	1
0.000102235	0	0	0	0.0178314	g__un_o__Gastranaerophilales	0.722417
8.4455e-05	0	0.000441632	0	0.188816	g__un_o__Izimaplasmatales	0.814225
0	0	0	0		g__un_o__Lactobacillales
0	0	0	0		g__un_o__Micrococcales
0.000146685	0	0.000137221	0	0.671761	g__un_o__Mollicutes_RF39	0.887423
8.89e-06	0	1.89271e-05	0	0.756472	g__un_o__Rhodospirillales	0.908056
0	0	0	0		g__un_o__Rickettsiales
0	0	0	0		g__un_o__Saccharimonadales
4.445e-06	0	6.30903e-06	0	0.812399	g__un_o__Selenomonadales	0.91871
0	0	4.73177e-06	0	0.569623	g__un_o__Victivallales	0.829029
2.2225e-05	0	1.73498e-05	0	0.889496	g__un_p__Firmicutes	0.951087
0	0	0	0		g__un_p__Proteobacteria
0	0	0	0		g__unidentified
0	0	5.20495e-05	0	0.569623	g__unidentified_rumen_bacterium_RF9	0.829029
0.00059563	0.00019558	0.000646675	9.77899e-05	0.484307	g__Veillonella	0.829029
0.00060452	0	0.000367501	0	0.956928	g__Victivallis	0.979105
0	0	5.20495e-05	0	0.407545	g__Weissella	0.829029
0	0	1.57726e-06	0	0.569623	g__Yersinia	0.829029

## Sheet: Mori_18AdnGenusWilcoxTest
Supplementary Table3. The Wilcoxon test results of the relative abundance of genera for the adenoma versus the normal within the each study.
Adenoma_mean	Adenoma_median	Normal_mean	Normal_median	pvalue	measures	FDR
0	0	0	0		g__Bacteroides_pectinophilus_group
0.000210981	0	5.48551e-05	0	0.658353	g__Clostridium_innocuum_group	0.963949
0.000278495	0	0.000130808	0	0.76324	g__Eubacterium_brachy_group	0.984101
0.0160683	0.00284825	0.0391539	0.014583	0.136834	g__Eubacterium_coprostanoligenes_group	0.819338
0.000459939	7.59532e-05	0.00198744	0.000379766	0.0998357	g__Eubacterium_eligens_group	0.819338
3.3757e-05	0	1.68785e-05	0	0.393467	g__Eubacterium_fissicatena_group	0.8422
0.0148489	0.0101398	0.0147898	0.0153046	0.39294	g__Eubacterium_hallii_group	0.8422
8.43925e-06	0	4.64159e-05	0	0.176145	g__Eubacterium_nodatum_group	0.819338
4.21962e-06	0	0	0	0.344943	g__Eubacterium_oxidoreducens_group	0.819338
0.000459939	0	0.00111398	0	0.112416	g__Eubacterium_ruminantium_group	0.819338
0	0	0	0		g__Eubacterium_saphenum_group
0.00280183	0.000645602	0.00241784	0.00110132	0.750605	g__Eubacterium_ventriosum_group	0.982719
0.000417743	0	0.000586528	0.000151906	0.43562	g__Eubacterium_xylanophilum_group	0.868193
0.00118149	0.000265836	0.000751093	0.00022786	0.697208	g__Ruminococcus_gauvreauii_group	0.967508
0.00536736	0.000493696	0.00135872	3.79766e-05	0.167664	g__Ruminococcus_gnavus_group	0.819338
0.00941398	0.00638007	0.00887387	0.00596233	0.787972	g__Ruminococcus_torques_group	0.993681
0	0	4.21962e-06	0	0.344943	g__Abiotrophia	0.819338
4.21962e-06	0	1.26589e-05	0	0.309261	g__Acetanaerobacterium	0.819338
2.53177e-05	0	0	0	0.163187	g__Acetitomaculum	0.819338
0.000396645	0	0.00164143	0	0.879072	g__Acidaminococcus	1
2.53177e-05	0	8.43925e-06	0	0.205828	g__Acinetobacter	0.819338
0.000185663	7.59532e-05	9.28317e-05	7.59532e-05	0.906725	g__Actinomyces	1
0.000215201	0	0.000679359	0.00011393	0.209769	g__Adlercreutzia	0.819338
4.21962e-06	0	0	0	0.344943	g__Aerococcus	0.819338
4.21962e-06	0	0	0	0.344943	g__Aeromonas	0.819338
0.0635517	0.0394197	0.0619778	0.0320902	0.824704	g__Agathobacter	1
6.32943e-05	0	8.43925e-06	0	0.580396	g__Aggregatibacter	0.94068
0.0354406	0.00144311	0.0329131	0.000683579	0.497119	g__Akkermansia	0.933517
0.0462217	0.017849	0.0359259	0.0300395	0.81472	g__Alistipes	1
0.000126589	0	5.90747e-05	0	0.261067	g__Allisonella	0.819338
0	0	0	0		g__Allobaculum
0.00190727	0	0.0017427	0	0.699169	g__Alloprevotella	0.967508
4.21962e-06	0	0	0	0.344943	g__Allorhizobium_Neorhizobium_Pararhizobium_Rhizobium	0.819338
1.68785e-05	0	0	0	0.080246	g__Alloscardovia	0.819338
1.68785e-05	0	2.10981e-05	0	0.836302	g__Anaerococcus	1
4.21962e-06	0	4.21962e-06	0	1	g__Anaerocolumna	1
8.43925e-06	0	3.79766e-05	0	0.317413	g__Anaerofilum	0.819338
0	0	1.68785e-05	0	0.163187	g__Anaerofustis	0.819338
4.21962e-06	0	0	0	0.344943	g__Anaeroglobus	0.819338
0	0	0	0		g__Anaeroplasma
0.0119247	0.00379766	0.00674718	0.0058484	0.787905	g__Anaerostipes	0.993681
0.000270056	7.59532e-05	0.000354448	0.00011393	0.74587	g__Anaerotruncus	0.982719
4.21962e-06	0	0	0	0.344943	g__Angelakisella	0.819338
2.95374e-05	0	4.21962e-06	0	0.552453	g__Aquabacterium	0.94068
8.43925e-06	0	8.43925e-06	0	1	g__Asteroleplasma	1
1.26589e-05	0	1.68785e-05	0	0.673564	g__Atopobium	0.963949
8.43925e-06	0	4.21962e-06	0	1	g__Atopococcus	1
0	0	0.000270056	0	0.344943	g__Azospirillum_sp__47_25	0.819338
0	0	0	0		g__Bacillus
0	0	0	0		g__Bacteroidales_bacterium_55_9
0.291605	0.276963	0.264275	0.205909	0.6503	g__Bacteroides	0.963949
0.00756156	0.00656995	0.00334194	0.000873462	0.0293171	g__Barnesiella	0.819338
0	0	0	0		g__Bergeyella
0.0550914	0.0105195	0.0190052	0.0104815	0.476461	g__Bifidobacterium	0.910979
0.000869242	0.00011393	0.00324489	0.000683579	0.107416	g__Bilophila	0.819338
0.0556864	0.04223	0.0790293	0.0395336	0.766563	g__Blautia	0.984101
0	0	0	0		g__Bosea
0	0	0	0		g__Brachybacterium
0	0	0	0		g__Bradyrhizobium
0	0	0	0		g__Brevundimonas
0	0	0	0		g__Brochothrix
0	0	0	0		g__Bulleidia
0	0	0	0		g__Burkholderia_Caballeronia_Paraburkholderia
0.00319425	0.0022786	0.00320691	0.00235455	0.911792	g__Butyricicoccus	1
0.00124057	0.000797509	0.000683579	0.000189883	0.149908	g__Butyricimonas	0.819338
0	0	0	0		g__Butyrivibrio
0.00150219	0	0.000308032	0	0.620646	g__CAG_352	0.945904
0.00154438	0.000379766	0.00122369	0.000379766	0.736679	g__CAG_56	0.982719
0	0	0	0		g__CAG_873
8.43925e-06	0	0	0	0.344943	g__Campylobacter	0.819338
2.53177e-05	0	0	0	0.344943	g__Candidatus_Melainabacteria_bacterium_MEL_A1	0.819338
8.43925e-06	0	0	0	0.344943	g__Candidatus_Methanogranum	0.819338
0	0	0	0		g__Candidatus_Methanomethylophilus
3.79766e-05	0	8.01728e-05	7.59532e-05	0.131891	g__Candidatus_Soleaferrea	0.819338
0	0	0	0		g__Candidatus_Stoquefichus
4.64159e-05	0	8.43925e-05	3.79766e-05	0.561149	g__Caproiciproducens	0.94068
2.95374e-05	0	2.95374e-05	0	1	g__Carnobacterium	1
1.68785e-05	0	2.10981e-05	0	0.72002	g__Catabacter	0.972538
0.00328709	0	0.00123213	0	0.353609	g__Catenibacterium	0.819338
0	0	0.000236299	0	0.163187	g__Catenisphaera	0.819338
4.21962e-06	0	4.21962e-06	0	1	g__Caulobacter	1
0	0	0	0		g__Cellulosilyticum
1.68785e-05	0	0.00010971	0	0.407702	g__Cercis_gigantea	0.856767
0	0	0	0		g__CHKCI001
2.10981e-05	0	2.10981e-05	0	1	g__CHKCI002	1
0.00697504	0.00174692	0.00516904	0.00288622	0.96173	g__Christensenellaceae_R_7_group	1
0	0	0	0		g__Chryseobacterium
4.21962e-06	0	8.43925e-06	0	1	g__Cloacibacillus	1
4.21962e-06	0	8.43925e-06	0	1	g__Clostridiales_bacterium_enrichment_culture_clone_06_1235251_67	1
0.00151484	0.000379766	0.000607626	0.000455719	0.712901	g__Clostridium_sensu_stricto_1	0.967508
0	0	0	0		g__Clostridium_sp__CAG_306
7.17336e-05	0	3.3757e-05	0	0.941718	g__Clostridium_sp__K4410_MGS_306	1
0.00193681	0.000341789	0.000848144	0.000569649	0.987297	g__Collinsella	1
0.000160346	0	0.000147687	0	0.897407	g__Coprobacter	1
0.000907219	0.000455719	0.000848144	0.000531672	0.949304	g__Coprococcus_1	1
0.00397067	0.000683579	0.0207183	0.000721556	0.455904	g__Coprococcus_2	0.88995
0.00607626	0.00349385	0.00566273	0.00391159	0.836188	g__Coprococcus_3	1
4.21962e-06	0	8.43925e-06	0	0.574419	g__Coriobacteriaceae_UCG_002	0.94068
1.26589e-05	0	0	0	0.344943	g__Coriobacteriaceae_UCG_003	0.819338
8.43925e-06	0	4.21962e-06	0	1	g__Corynebacterium	1
8.43925e-06	0	1.68785e-05	0	0.616587	g__Corynebacterium_1	0.945904
0	0	0	0		g__Curvibacter
4.64159e-05	0	5.06355e-05	0	0.92781	g__Defluviitaleaceae_UCG_011	1
0	0	0	0		g__Deinococcus
0	0	0	0		g__Denitrobacterium
0.00132918	0	0.000417743	0	0.658576	g__Desulfovibrio	0.963949
0.00272588	0.00011393	0.0062788	0.0011393	0.580911	g__Dialister	0.94068
0.000510574	0	0	0	0.163187	g__Dielma	0.819338
8.43925e-06	0	1.68785e-05	0	0.616587	g__DNF00809	0.945904
0	0	0	0		g__Dolosigranulum
0.0124943	0.00748139	0.0110934	0.00812699	0.428935	g__Dorea	0.868193
0.000210981	7.59532e-05	0.000459939	0.00011393	0.497876	g__DTU089	0.933517
0	0	0	0		g__Dyella
0.000168785	0	0.000173005	3.79766e-05	0.304271	g__Eggerthella	0.819338
0	0	1.26589e-05	0	0.079992	g__Eikenella	0.819338
0.000603406	0	0.000168785	0	0.601174	g__Eisenbergiella	0.945904
0	0	0	0		g__Elusimicrobium
4.21962e-06	0	8.43925e-06	0	0.574419	g__Enhydrobacter	0.94068
0	0	0	0		g__Enorma
0.000118149	0	0.000198322	0	0.882779	g__Enterococcus	1
8.86121e-05	0	0.000160346	0	0.516587	g__Enterorhabdus	0.94068
1.68785e-05	0	0	0	0.163187	g__Epulopiscium	0.819338
0.00033757	7.59532e-05	0.000346009	7.59532e-05	0.882086	g__Erysipelatoclostridium	1
0	0	8.43925e-06	0	0.344943	g__Erysipelotrichaceae_UCG_002	0.819338
0.00505933	0.00110132	0.00320691	0.000987392	0.974616	g__Erysipelotrichaceae_UCG_003	1
0	0	0	0		g__Erysipelotrichaceae_UCG_004
0.0121947	0.00110132	0.00863335	0.000721556	0.750307	g__Escherichia_Shigella	0.982719
0	0	0	0		g__Eubacterium
0.000126589	0	8.43925e-06	0	0.930686	g__Ezakiella	1
4.21962e-06	0	0	0	0.344943	g__F0332	0.819338
0.0275879	0.0170135	0.0473315	0.0377867	0.254402	g__Faecalibacterium	0.819338
1.68785e-05	0	0	0	0.344943	g__Faecalicoccus	0.819338
9.28317e-05	0	8.86121e-05	0	0.433385	g__Faecalitalea	0.868193
0.00033335	0.00011393	0.000578088	0.000303813	0.196106	g__Family_XIII_AD3011_group	0.819338
0.000291154	7.59532e-05	0.000316472	0.000303813	0.346016	g__Family_XIII_UCG_001	0.819338
0	0	0	0		g__Fastidiosipila
0	0	0	0		g__Filifactor
4.21962e-06	0	1.26589e-05	0	0.552453	g__Finegoldia	0.94068
0	0	0	0		g__Firmicutes_bacterium_CAG_345
0	0	0	0		g__Flavobacterium
0.000962074	0.000151906	0.00122369	0.000607626	0.272088	g__Flavonifractor	0.819338
0.000189883	0.000151906	0.000215201	7.59532e-05	0.467049	g__Fournierella	0.905503
0	0	0	0		g__Fretibacterium
8.43925e-06	0	0	0	0.344943	g__Fructobacillus	0.819338
0.0119795	0.00641805	0.00928739	0.00383564	0.974757	g__Fusicatenibacter	1
0.000662481	0	0.000489476	0	0.845658	g__Fusobacterium	1
0	0	0	0		g__Gardnerella
4.64159e-05	0	0.000156126	0.00011393	0.0591946	g__GCA_900066225	0.819338
0.000177224	3.79766e-05	0.000135028	7.59532e-05	0.827323	g__GCA_900066575	1
0	0	0	0		g__GCA_900066755
5.06355e-05	0	5.06355e-05	0	0.587729	g__Gemella	0.945904
5.90747e-05	0	2.53177e-05	0	0.663154	g__Gordonibacter	0.963949
4.21962e-06	0	4.21962e-06	0	1	g__Granulicatella	1
0.00170051	7.59532e-05	0.00132918	0	0.411872	g__gut_metagenome	0.856815
0.00089034	0	0.000181444	0	0.192835	g__Haemophilus	0.819338
4.21962e-06	0	0	0	0.344943	g__Hafnia_Obesumbacterium	0.819338
0	0	0	0		g__Halomonas
4.21962e-06	0	0	0	0.344943	g__Harryflintia	0.819338
0	0	0	0		g__hgcI_clade
0.00273854	0	0.00198744	0	0.351822	g__Holdemanella	0.819338
3.79766e-05	0	1.68785e-05	0	0.947654	g__Holdemania	1
5.48551e-05	0	0.00010971	0	0.353609	g__Howardella	0.819338
0.000379766	0	0.000324911	7.59532e-05	0.225713	g__Hungatella	0.819338
8.43925e-06	0	0.000350229	0	0.190718	g__Hydrogenoanaerobacterium	0.819338
0	0	0	0		g__Hymenobacter
0	0	0	0		g__Hyphomicrobium
0.00254443	0	0.00287356	0.00022786	0.188912	g__Intestinibacter	0.819338
0.000126589	0	9.70513e-05	0	0.985886	g__Intestinimonas	1
0	0	0	0		g__Johnsonella
0.00258241	0	0.00117306	0	0.546314	g__Klebsiella	0.94068
0	0	0	0		g__Kocuria
8.43925e-06	0	0	0	0.344943	g__Lachnoanaerobaculum	0.819338
0.00481037	0.00315206	0.0040213	0.00159502	0.383991	g__Lachnoclostridium	0.84149
0.000324911	0.00011393	0.00089456	0.000417743	0.143973	g__Lachnospira	0.819338
4.21962e-06	0	0	0	0.344943	g__Lachnospiraceae_AC2044_group	0.819338
0.00022786	7.59532e-05	0.000257397	0.00022786	0.286144	g__Lachnospiraceae_FCS020_group	0.819338
0.000641383	0.00022786	0.000881901	0.000189883	0.685194	g__Lachnospiraceae_ND3007_group	0.966734
0	0	0	0		g__Lachnospiraceae_NK3A20_group
0.0026879	0.00125323	0.00349385	0.000797509	0.849182	g__Lachnospiraceae_NK4A136_group	1
0	0	8.43925e-06	0	0.344943	g__Lachnospiraceae_NK4B4_group	0.819338
0.00130808	0.000151906	0.00198322	0.000189883	0.845697	g__Lachnospiraceae_UCG_001	1
5.06355e-05	0	0	0	0.0803306	g__Lachnospiraceae_UCG_003	0.819338
0.000139248	7.59532e-05	0.000206762	7.59532e-05	0.986725	g__Lachnospiraceae_UCG_004	1
3.79766e-05	0	5.90747e-05	0	0.617193	g__Lachnospiraceae_UCG_008	0.945904
0.000746873	0.000341789	0.000362888	0.000189883	0.301581	g__Lachnospiraceae_UCG_010	0.819338
0.000810168	0	0.000379766	0	0.820986	g__Lactobacillus	1
0.000270056	0	7.17336e-05	0	0.894887	g__Lactococcus	1
0	0	0	0		g__Lactonifactor
4.21962e-06	0	0	0	0.344943	g__Lawsonella	0.819338
0	0	0	0		g__Legionella
0	0	0	0		g__Leifsonia
0	0	0	0		g__Leptotrichia
0	0	1.68785e-05	0	0.080246	g__Leuconostoc	0.819338
2.95374e-05	0	2.10981e-05	0	1	g__Libanicoccus	1
8.43925e-06	0	0	0	0.344943	g__Mailhella	0.819338
0.000464159	0.00011393	0.0004515	0.00022786	0.38679	g__Marvinbryantia	0.84149
8.43925e-06	0	0	0	0.344943	g__Massilia	0.819338
0	0	0	0		g__Megamonas
4.21962e-06	0	0.00142623	0	1	g__Megasphaera	1
4.21962e-06	0	2.10981e-05	0	0.154729	g__Merdibacter	0.819338
0.00195369	0	0.00056121	0	0.384628	g__metagenome	0.84149
0.000978953	0	0.00293264	0.000151906	0.0418598	g__Methanobrevibacter	0.819338
0	0	0.000185663	0	0.0395342	g__Methanosphaera	0.819338
3.3757e-05	0	2.95374e-05	0	0.42106	g__Methylobacterium	0.868193
0	0	0	0		g__Micrococcus
0	0	0.000151906	0	0.163187	g__Mitsuokella	0.819338
8.43925e-06	0	0	0	0.163015	g__Mobiluncus	0.819338
3.3757e-05	0	0.000320691	0	0.547168	g__Mogibacterium	0.94068
3.79766e-05	0	4.21962e-06	0	0.552453	g__Morganella	0.94068
8.86121e-05	0	5.90747e-05	0	0.929248	g__Moryella	1
0	0	0	0		g__Mucispirillum
1.26589e-05	0	0	0	0.344943	g__Murdochiella	0.819338
0.00010971	0	0.000312252	0	0.85396	g__Negativibacillus	1
0	0	0	0		g__Negativicoccus
4.21962e-06	0	8.43925e-06	0	0.574419	g__Neisseria	0.94068
0	0	0	0		g__Neochlamydia
0	0	0	0		g__Nordella
0	0	0	0		g__Nubsella
0	0	0	0		g__Oceanivirga
0.000485257	0.000493696	0.000476817	0.000379766	0.379658	g__Odoribacter	0.84149
1.26589e-05	0	3.79766e-05	0	0.328991	g__Olsenella	0.819338
1.26589e-05	0	0.00010971	0	0.171273	g__Oribacterium	0.819338
0.00165409	0.000873462	0.000729995	0.000341789	0.124355	g__Oscillibacter	0.819338
8.43925e-05	0	0.00021942	0	0.731784	g__Oscillospira	0.982719
4.21962e-05	0	5.06355e-05	0	1	g__Oxalobacter	1
1.68785e-05	0	8.43925e-06	0	0.574848	g__Paeniclostridium	0.94068
0	0	0	0		g__Papillibacter
0.0110723	0.00607626	0.0100469	0.00694972	0.751694	g__Parabacteroides	0.982719
0.000130808	0	0	0	0.00411221	g__Paracoccus	0.819338
0.00164143	0	0.00548973	0	0.645594	g__Paraprevotella	0.963949
0	0	0	0		g__Parascardovia
0.00643492	0.000151906	0.00141779	0	0.255438	g__Parasutterella	0.819338
2.95374e-05	0	2.95374e-05	0	0.712619	g__Parvimonas	0.967508
0	0	2.10981e-05	0	0.163187	g__Pediococcus	0.819338
0.0012912	0	2.10981e-05	0	0.596247	g__Pelomonas	0.945904
0	0	0	0		g__Peptoclostridium
0.000527453	0	0.000101271	0	0.252492	g__Peptococcus	0.819338
8.43925e-06	0	1.26589e-05	0	0.653582	g__Peptoniphilus	0.963949
2.53177e-05	0	4.21962e-06	0	0.552453	g__Peptostreptococcus	0.94068
0.000902999	0.000341789	0.00125323	0.000341789	0.661669	g__Phascolarctobacterium	0.963949
2.53177e-05	0	8.43925e-06	0	0.118954	g__Phocea	0.819338
0	0	0	0		g__Phreatobacter
6.32943e-05	0	0	0	0.0803306	g__Porphyromonas	0.819338
0.00022786	0	0.000126589	0	0.711987	g__Prevotella	0.967508
0	0	0.00146843	0	0.163187	g__Prevotella_2	0.819338
5.90747e-05	0	4.21962e-06	0	0.283369	g__Prevotella_6	0.819338
7.59532e-05	0	0	0	0.163187	g__Prevotella_7	0.819338
0.0261659	0	0.0465045	0	0.366547	g__Prevotella_9	0.84149
0.00686533	0	0.00275963	0	0.67733	g__Prevotellaceae_NK3B31_group	0.963949
7.59532e-05	0	0.000215201	0	0.620646	g__Prevotellaceae_UCG_001	0.945904
4.64159e-05	0	0	0	0.344943	g__Proteus	0.819338
4.21962e-06	0	1.68785e-05	0	1	g__Pseudobutyrivibrio	1
0.000147687	0	2.10981e-05	0	0.255506	g__Pseudoflavonifractor	0.819338
2.10981e-05	0	0	0	0.163187	g__Pseudomonas	0.819338
1.68785e-05	0	2.10981e-05	0	1	g__Pygmaiobacter	1
0	0	0.00191571	0	0.0395342	g__Pyramidobacter	0.819338
0	0	0	0		g__Ralstonia
0	0	4.21962e-06	0	0.344943	g__Raoultibacter	0.819338
0	0	0	0		g__Rikenella
0.00379766	0	0.00121525	0	0.673784	g__Rikenellaceae_RC9_gut_group	0.963949
0.00181022	0.000417743	0.0011393	0.000417743	0.679837	g__Romboutsia	0.963949
0.00939288	0.00751937	0.0108613	0.0047091	0.76373	g__Roseburia	0.984101
8.43925e-06	0	4.21962e-06	0	0.574419	g__Rothia	0.94068
2.95374e-05	0	4.64159e-05	0	0.471023	g__Ruminiclostridium	0.907038
0	0	5.90747e-05	0	0.0395342	g__Ruminiclostridium_1	0.819338
0.00187351	0.00155704	0.00254021	0.00155704	0.987365	g__Ruminiclostridium_5	1
0.00142201	0	0.00369217	7.59532e-05	0.536324	g__Ruminiclostridium_6	0.94068
0.000877682	0.000607626	0.000907219	0.000645602	0.861343	g__Ruminiclostridium_9	1
0.00259085	0.00110132	0.00380188	0.000721556	0.819412	g__Ruminococcaceae_NK4A214_group	1
0.00926207	0.00964606	0.0117095	0.0076333	0.823776	g__Ruminococcaceae_UCG_002	1
0.000654042	3.79766e-05	0.000540112	0.000417743	0.610568	g__Ruminococcaceae_UCG_003	0.945904
0.000852364	0.000797509	0.0015908	0.000873462	0.341825	g__Ruminococcaceae_UCG_004	0.819338
0.00348119	0.00155704	0.00423228	0.00254443	0.748223	g__Ruminococcaceae_UCG_005	0.982719
8.43925e-06	0	4.64159e-05	0	0.341226	g__Ruminococcaceae_UCG_007	0.819338
0.000202542	0	8.01728e-05	0	0.876575	g__Ruminococcaceae_UCG_008	1
1.68785e-05	0	0.000105491	0	0.0553891	g__Ruminococcaceae_UCG_009	0.819338
0.000358668	0.00022786	0.00124057	0.000265836	0.29651	g__Ruminococcaceae_UCG_010	0.819338
4.21962e-06	0	0	0	0.344943	g__Ruminococcaceae_UCG_011	0.819338
0.0015697	0.00148109	0.00294952	0.00170895	0.341638	g__Ruminococcaceae_UCG_013	0.819338
0.0049032	0.00155704	0.00721977	0.00174692	0.712012	g__Ruminococcaceae_UCG_014	0.967508
0.00302125	0.00167097	0.00460783	0.00201276	0.454697	g__Ruminococcus_1	0.88995
0.0741599	0.0419262	0.054007	0.0205453	0.384144	g__Ruminococcus_2	0.84149
0	0	0	0		g__S5_A14a
0	0	1.68785e-05	0	0.163187	g__Sanguibacteroides	0.819338
0	0	2.53177e-05	0	0.344943	g__Sarcina	0.819338
8.43925e-06	0	4.21962e-06	0	0.574419	g__Scardovia	0.94068
0	0	0	0		g__Schlegelella
4.21962e-06	0	4.21962e-06	0	1	g__Sediminibacterium	1
4.21962e-06	0	0	0	0.344943	g__Selenomonas_3	0.819338
0	0	0	0		g__Selenomonas_4
0.000164565	0	0.000278495	0	0.377034	g__Sellimonas	0.84149
0.000101271	0	0.000316472	0	0.395982	g__Senegalimassilia	0.8422
5.90747e-05	0	0.00010971	3.79766e-05	0.292483	g__Shuttleworthia	0.819338
7.17336e-05	0	6.7514e-05	0	0.755857	g__Slackia	0.98365
0	0	0	0		g__Sneathia
5.90747e-05	0	1.26589e-05	0	0.20749	g__Solobacterium	0.819338
0	0	4.21962e-06	0	0.344943	g__Sphingobium	0.819338
1.26589e-05	0	4.21962e-06	0	1	g__Sphingomonas	1
0.000189883	0.000151906	0.000143467	0.00011393	0.44506	g__Staphylococcus	0.880848
8.43925e-06	0	0	0	0.163015	g__Stenotrophomonas	0.819338
0	0	0	0		g__Stomatobaculum
0.0104098	0.00106334	0.0115871	0.000987392	0.800058	g__Streptococcus	1
0.0275921	0.0237354	0.0291323	0.0213049	0.974759	g__Subdoligranulum	1
0	0	0	0		g__Succinatimonas
0	0	0	0		g__Succiniclasticum
0.000240519	0	0	0	0.344943	g__Succinivibrio	0.819338
0.00234189	0.000341789	0.000919878	0.00011393	0.70721	g__Sutterella	0.967508
0	0	0	0		g__Synergistes
0	0	0	0		g__Syntrophococcus
0	0	0	0		g__Syntrophomonas
0	0	4.21962e-06	0	0.344943	g__Tepidimonas	0.819338
0.000185663	0	0.000527453	3.79766e-05	0.182372	g__Terrisporobacter	0.819338
0	0	0	0		g__Tetragenococcus
0	0	0	0		g__Treponema_2
0.0006667	0	0.000362888	3.79766e-05	0.945337	g__Turicibacter	1
0.000865023	0	1.68785e-05	0	0.372217	g__Tyzzerella	0.84149
3.79766e-05	0	0.000206762	0	0.100475	g__Tyzzerella_3	0.819338
0.000299593	0	0.000139248	0	1	g__Tyzzerella_4	1
0.00489476	0.000303813	0.00113508	0.000455719	0.578083	g__UBA1819	0.94068
1.26589e-05	0	1.68785e-05	0	0.712178	g__UC5_1_2E3	0.967508
0	0	0	0		g__un_c__Alphaproteobacteria
0	0	0	0		g__un_c__Bacilli
0	0	0	0		g__un_c__Bacteroidia
5.48551e-05	0	7.17336e-05	3.79766e-05	0.557481	g__un_c__Clostridia	0.94068
0	0	0	0		g__un_c__Gammaproteobacteria
0	0	0	0		g__un_f__Actinomycetaceae
8.43925e-06	0	0	0	0.344943	g__un_f__Atopobiaceae	0.819338
0.000135028	0	8.43925e-06	0	0.0855859	g__un_f__Barnesiellaceae	0.819338
0.000248958	0	0	0	0.344943	g__un_f__Burkholderiaceae	0.819338
4.21962e-06	0	0	0	0.344943	g__un_f__Caulobacteraceae	0.819338
0.000101271	0	0.00011393	0	0.9138	g__un_f__Christensenellaceae	1
0	0	0	0		g__un_f__Clostridiaceae_1
2.53177e-05	0	2.53177e-05	0	0.479463	g__un_f__Clostridiales_vadinBB60_group	0.910979
0.000320691	0	0.00305501	0.000151906	0.115349	g__un_f__Coriobacteriales_Incertae_Sedis	0.819338
1.68785e-05	0	2.95374e-05	0	0.617089	g__un_f__Desulfovibrionaceae	0.945904
0.000156126	0	0.000843925	0	0.504901	g__un_f__Eggerthellaceae	0.936409
0	0	0	0		g__un_f__Enterobacteriaceae
2.10981e-05	0	5.06355e-05	0	0.635799	g__un_f__Erysipelotrichaceae	0.958744
4.21962e-05	0	3.79766e-05	0	0.676449	g__un_f__Family_XIII	0.963949
0	0	0	0		g__un_f__Fimbriimonadaceae
3.3757e-05	0	0.000126589	0	0.43363	g__un_f__Flavobacteriaceae	0.868193
0.00605938	0.0047091	0.00734636	0.00679781	0.428846	g__un_f__Lachnospiraceae	0.868193
0	0	8.43925e-06	0	0.163015	g__un_f__Mitochondria	0.819338
0.00112664	0	0.00549817	0	0.408843	g__un_f__Muribaculaceae	0.856767
2.10981e-05	0	2.53177e-05	0	0.556335	g__un_f__Neisseriaceae	0.94068
0	0	0	0		g__un_f__Paludibacteraceae
0	0	0	0		g__un_f__Parachlamydiaceae
3.3757e-05	0	7.59532e-05	0	0.631592	g__un_f__Peptococcaceae	0.957466
0	0	0	0		g__un_f__Peptostreptococcaceae
0.00132918	0	0.000316472	0	0.567095	g__un_f__Prevotellaceae	0.94068
0	0	4.21962e-06	0	0.344943	g__un_f__Puniceicoccaceae	0.819338
0	0	0	0		g__un_f__Rikenellaceae
0.00184819	0.00117727	0.00802572	0.00110132	0.505989	g__un_f__Ruminococcaceae	0.936409
0	0	0	0		g__un_f__Succinivibrionaceae
0	0	8.43925e-06	0	0.344943	g__un_f__vadinBE97	0.819338
0	0	4.21962e-06	0	0.344943	g__un_f__Veillonellaceae	0.819338
8.43925e-06	0	2.10981e-05	0	0.976854	g__un_f__Victivallaceae	1
6.32943e-05	7.59532e-05	7.17336e-05	7.59532e-05	0.785261	g__un_k__Bacteria	0.993681
0	0	3.79766e-05	0	0.344943	g__un_o__Bacteroidales	0.819338
3.3757e-05	0	6.32943e-05	0	0.967941	g__un_o__Clostridiales	1
1.26589e-05	0	4.21962e-05	0	0.179424	g__un_o__Coriobacteriales	0.819338
0	0	0	0		g__un_o__Desulfovibrionales
0	0	8.43925e-06	0	0.163015	g__un_o__Gammaproteobacteria_Incertae_Sedis	0.819338
5.90747e-05	0	1.26589e-05	0	0.598748	g__un_o__Gastranaerophilales	0.945904
1.26589e-05	0	8.43925e-06	0	1	g__un_o__Izimaplasmatales	1
5.90747e-05	0	0.000278495	0	0.199771	g__un_o__Mollicutes_RF39	0.819338
0	0	0	0		g__un_o__Myxococcales
4.21962e-06	0	8.43925e-06	0	0.574419	g__un_o__Obscuribacterales	0.94068
0	0	4.21962e-06	0	0.344943	g__un_o__Rhodospirillales	0.819338
1.68785e-05	0	4.21962e-05	0	0.23132	g__un_p__Proteobacteria	0.819338
4.21962e-06	0	0	0	0.344943	g__un_Unclassified	0.819338
0	0	0	0		g__unidentified
0	0	8.43925e-06	0	0.344943	g__Varibaculum	0.819338
0.0004515	0	0.000194103	0	0.285671	g__Veillonella	0.819338
0	0	0	0		g__Vibrio
2.53177e-05	0	4.21962e-06	0	0.154729	g__Victivallis	0.819338
3.3757e-05	0	1.26589e-05	0	0.772149	g__Weissella	0.986827
0	0	0	0		g__Wolinella

## Sheet: Zeller_15AdnGenusWilcoxTest
Supplementary Table3. The Wilcoxon test results of the relative abundance of genera for the adenoma versus the normal within the each study.
Adenoma_mean	Adenoma_median	Normal_mean	Normal_median	pvalue	measures	FDR
2.15626e-06	0	0	0	0.0462249	g__Anaerorhabdus_furcosa_group	0.831524
0.000242938	0	0.000508517	0	0.114124	g__Bacteroides_pectinophilus_group	0.831524
0.000196219	0	0.000112125	1.79688e-05	0.846998	g__Clostridium_innocuum_group	0.977576
0.000464314	7.18752e-05	0.000520736	8.08596e-05	0.900938	g__Eubacterium_brachy_group	1
0.0315094	0.0200352	0.0234734	0.018418	0.677522	g__Eubacterium_coprostanoligenes_group	0.938463
0.00717387	0.00465392	0.0108125	0.00589377	0.295742	g__Eubacterium_eligens_group	0.831524
0.0131481	0.00630705	0.0163239	0.0122817	0.198127	g__Eubacterium_hallii_group	0.831524
7.40315e-05	3.59376e-05	0.000148782	3.59376e-05	0.770559	g__Eubacterium_nodatum_group	0.963058
3.88126e-05	1.79688e-05	4.09689e-05	0	0.961491	g__Eubacterium_oxidoreducens_group	1
0.00510314	0.000125782	0.00471897	5.39064e-05	0.614941	g__Eubacterium_ruminantium_group	0.918082
7.18752e-07	0	2.15626e-06	0	0.515675	g__Eubacterium_saphenum_group	0.838778
0.00303888	0.00265938	0.00306763	0.00232696	0.694006	g__Eubacterium_ventriosum_group	0.949122
0.00119097	0.00030547	0.00146374	0.000655861	0.464126	g__Eubacterium_xylanophilum_group	0.831524
0.00633149	0.00201251	0.00319665	0.00152735	0.874934	g__Ruminococcus_gauvreauii_group	0.993217
0.00289801	8.9844e-05	0.00173471	0.000170704	0.910238	g__Ruminococcus_gnavus_group	1
0.0145526	0.0095055	0.0213092	0.0119582	0.496523	g__Ruminococcus_torques_group	0.831524
1.07813e-05	0	1.90469e-05	0	0.629461	g__Abiotrophia	0.920315
2.58751e-05	0	6.03752e-05	8.9844e-06	0.559565	g__Acetanaerobacterium	0.880639
2.15626e-05	0	4.45626e-05	0	0.765537	g__Acetitomaculum	0.963058
0.00708833	5.39064e-05	0.00352728	5.39064e-05	1	g__Acidaminococcus	1
4.09689e-05	0	3.73751e-05	0	0.695582	g__Acinetobacter	0.949122
0.000154532	3.59376e-05	9.95472e-05	4.4922e-05	0.754613	g__Actinomyces	0.963058
0	0	7.18752e-07	0	0.49725	g__Actinotignum	0.831524
0	0	0	0		g__Adhaeribacter
0	0	2.51563e-06	0	0.107014	g__Adlercreutzia	0.831524
0	0	3.95314e-06	0	0.0750708	g__Aegilops_tauschii	0.831524
0	0	7.18752e-07	0	0.49725	g__Aerococcus	0.831524
0	0	1.07813e-06	0	0.49725	g__Aeromonas	0.831524
1.29375e-05	0	2.98282e-05	0	0.3501	g__Afipia	0.831524
0.0277747	0.0248149	0.0222414	0.014411	0.365602	g__Agathobacter	0.831524
0.0064774	0.000467189	0.00788184	0.00103321	0.551008	g__Akkermansia	0.875009
5.03127e-06	0	8.62503e-06	0	0.780719	g__Alcaligenes	0.963058
0	0	0	0		g__Alishewanella
0.00832387	0.00425861	0.00874614	0.00444728	0.826519	g__Alistipes	0.973455
0.000185438	0	6.03752e-05	0	0.147514	g__Allisonella	0.831524
0	0	0	0		g__Alloiococcus
0.00762093	1.79688e-05	0.00193883	8.9844e-06	0.0883982	g__Alloprevotella	0.831524
2.87501e-06	0	0	0	0.165768	g__Allorhizobium_Neorhizobium_Pararhizobium_Rhizobium	0.831524
7.33127e-05	0	5.13908e-05	0	0.346349	g__Alloscardovia	0.831524
0	0	3.19845e-05	0	0.49725	g__Anaerobiospirillum	0.831524
7.18752e-06	0	2.04844e-05	0	0.433062	g__Anaerococcus	0.831524
0	0	0	0		g__Anaerocolumna
5.17502e-05	1.79688e-05	4.95939e-05	1.79688e-05	0.305786	g__Anaerofilum	0.831524
3.09063e-05	0	0.000100985	3.59376e-05	0.0666821	g__Anaerofustis	0.831524
0	0	7.18752e-07	0	0.49725	g__Anaeroglobus	0.831524
1.86876e-05	0	0.00146266	0	0.388127	g__Anaeroplasma	0.831524
2.87501e-06	0	0	0	0.165768	g__Anaerosporobacter	0.831524
0.0142392	0.00905628	0.0266808	0.014384	0.0896653	g__Anaerostipes	0.831524
0.000172501	3.59376e-05	0.000125063	5.39064e-05	0.448959	g__Anaerotruncus	0.831524
6.46877e-06	0	1.4375e-06	0	0.220658	g__Anaerovorax	0.831524
1.79688e-05	0	1.00625e-05	0	0.604098	g__Angelakisella	0.918082
0	0	0	0		g__Anoxybacillus
0	0	3.59376e-07	0	0.49725	g__Arcobacter	0.831524
0	0	0	0		g__Arthrobacter
2.87501e-06	0	4.31251e-06	0	0.789227	g__Asteroleplasma	0.963058
3.23439e-05	0	2.08438e-05	0	0.515356	g__Atopobium	0.838778
5.89377e-05	0	0.00024222	0	0.0680817	g__Azospirillum_sp__47_25	0.831524
0	0	4.31251e-06	0	0.220658	g__Bacillus	0.831524
4.52814e-05	0	8.9844e-06	0	0.189333	g__Bacteroidales_bacterium_55_9	0.831524
0.0750521	0.0578596	0.092028	0.068542	0.547648	g__Bacteroides	0.872943
0.000656221	0.000269532	0.000658018	0.000188672	0.932442	g__Barnesiella	1
0	0	0	0		g__Basfia
2.15626e-06	0	0	0	0.165768	g__Bdellovibrio	0.831524
1.4375e-06	0	3.59376e-07	0	0.220544	g__Bergeyella	0.831524
0.00409545	0.000592971	0.0121634	0.00214727	0.0669125	g__Bifidobacterium	0.831524
0.000566377	0.000125782	0.000559549	0.000314454	0.259953	g__Bilophila	0.831524
0	0	2.87501e-06	0	0.49725	g__Blastocatella	0.831524
0	0	3.59376e-07	0	0.49725	g__Blastococcus	0.831524
0.0821297	0.0583267	0.101826	0.0706444	0.500091	g__Blautia	0.831524
0	0	0	0		g__Bosea
1.4375e-06	0	1.4375e-06	0	1	g__Brachybacterium	1
0	0	0	0		g__Brachyspira
1.65313e-05	0	6.82815e-06	0	0.784069	g__Brevibacillus	0.963058
2.87501e-06	0	1.18594e-05	0	0.643294	g__Brevibacterium	0.927392
3.59376e-06	0	0	0	0.0462249	g__Brevundimonas	0.831524
2.87501e-06	0	3.59376e-07	0	0.614706	g__Brochothrix	0.918082
2.87501e-06	0	3.23439e-06	0	0.608405	g__Bulleidia	0.918082
0	0	7.18752e-07	0	0.49725	g__Burkholderia_Caballeronia_Paraburkholderia	0.831524
0.00207073	0.00208438	0.00207935	0.00151836	0.44468	g__Butyricicoccus	0.831524
0.000232876	0.000107813	0.000326314	5.39064e-05	0.96384	g__Butyricimonas	1
0.0103256	3.59376e-05	0.00597642	3.59376e-05	0.759172	g__Butyrivibrio	0.963058
0.000188313	0	0.00191691	1.79688e-05	0.448304	g__CAG_352	0.831524
0.00121325	0.000700783	0.00133975	0.000314454	0.463426	g__CAG_56	0.831524
0	0	1.4375e-05	0	0.49725	g__CAG_873	0.831524
0	0	0	0		g__Caldicoprobacter
0	0	3.59376e-07	0	0.49725	g__Campylobacter	0.831524
6.46877e-05	0	3.09063e-05	0	0.614706	g__Candidatus_Gastranaerophilales_bacterium_Zag_111	0.918082
7.18752e-07	0	1.00625e-05	0	0.515675	g__Candidatus_Melainabacteria_bacterium_MEL_A1	0.838778
2.22813e-05	0	3.23439e-06	0	0.470549	g__Candidatus_Methanomethylophilus	0.831524
0	0	0	0		g__Candidatus_Saccharimonas
0.000105657	7.18752e-05	0.000108891	0.000107813	0.350963	g__Candidatus_Soleaferrea	0.831524
7.18752e-07	0	1.79688e-06	0	0.986795	g__Candidatus_Stoquefichus	1
7.18752e-07	0	3.59376e-07	0	0.628899	g__Capnocytophaga	0.920315
5.24689e-05	1.79688e-05	7.00783e-05	3.59376e-05	0.604581	g__Caproiciproducens	0.918082
0	0	3.59376e-07	0	0.49725	g__Cardiobacterium	0.831524
0.000148063	5.39064e-05	0.000131172	3.59376e-05	0.192065	g__Carnobacterium	0.831524
0.0001035	0	6.21721e-05	3.59376e-05	0.246698	g__Catabacter	0.831524
0.00111982	0	0.00241213	0	0.790788	g__Catenibacterium	0.963058
1.15e-05	0	0.00106663	0	0.361539	g__Catenisphaera	0.831524
8.1219e-05	3.59376e-05	7.72659e-05	8.9844e-06	0.0957395	g__Caulobacter	0.831524
2.30001e-05	0	3.01876e-05	0	1	g__Cellulosilyticum	1
8.62503e-06	0	1.97657e-05	0	0.325567	g__Cercis_gigantea	0.831524
2.15626e-06	0	1.07813e-06	0	0.986795	g__CHKCI001	1
1.4375e-06	0	1.07813e-06	0	1	g__CHKCI002	1
0.00996262	0.00301876	0.0147811	0.00485158	0.444683	g__Christensenellaceae_R_7_group	0.831524
0	0	1.4375e-05	0	0.49725	g__Chroococcidiopsis_CC1	0.831524
0	0	0	0		g__Chroococcidiopsis_PCC_7203
2.15626e-06	0	7.18752e-07	0	0.986794	g__Chryseobacterium	1
0.00161647	0	0.000437361	1.79688e-05	0.224115	g__Cloacibacillus	0.831524
1.94063e-05	0	2.22813e-05	0	0.3892	g__Cloacibacterium	0.831524
8.05003e-05	0	0.000181844	0	0.555396	g__Clostridiales_bacterium_enrichment_culture_clone_06_1235251_67	0.878686
0	0	0	0		g__Clostridioides
0.00452311	0.00100625	0.00422734	0.00118594	0.883793	g__Clostridium_sensu_stricto_1	0.996618
0	0	0	0		g__Clostridium_sensu_stricto_13
0	0	0	0		g__Clostridium_sensu_stricto_2
0	0	7.18752e-07	0	0.323795	g__Clostridium_sensu_stricto_3	0.831524
3.59376e-06	0	1.25782e-05	0	0.383217	g__Clostridium_sp__CAG_306	0.831524
9.77503e-05	0	0.000182922	0	0.589537	g__Clostridium_sp__K4410_MGS_306	0.918082
2.15626e-06	0	0	0	0.165768	g__Collinsella	0.831524
0	0	2.15626e-06	0	0.323839	g__Conchiformibius	0.831524
0.000140875	5.39064e-05	0.000367282	1.79688e-05	0.807171	g__Coprobacter	0.966692
0.00145835	0.00115	0.00133544	0.000781643	0.149992	g__Coprococcus_1	0.831524
0.00849062	0.00271329	0.0112531	0.00153633	0.959588	g__Coprococcus_2	1
0.0065694	0.00468986	0.00816754	0.00485158	0.991032	g__Coprococcus_3	1
2.87501e-06	0	4.67189e-06	0	0.608405	g__Coriobacteriaceae_UCG_002	0.918082
2.58751e-05	0	1.22188e-05	0	0.489396	g__Corynebacterium	0.831524
9.91878e-05	0	8.22971e-05	0	0.350429	g__Corynebacterium_1	0.831524
7.18752e-07	0	8.9844e-06	0	0.0610728	g__Cuneatibacter	0.831524
0	0	3.59376e-07	0	0.49725	g__Cutibacterium	0.831524
0.000148782	8.9844e-05	0.000301157	0.000179688	0.0889388	g__Defluviitaleaceae_UCG_011	0.831524
3.59376e-06	0	0	0	0.165768	g__Deinococcus	0.831524
7.18752e-07	0	0	0	0.165768	g__Denitrobacterium	0.831524
0	0	0	0		g__Dermacoccus
0	0	0	0		g__Desulfitibacter
0	0	0	0		g__Desulfotomaculum
0.00521455	0.00111407	0.0023169	0.00100625	0.995508	g__Desulfovibrio	1
2.87501e-06	0	0	0	0.165768	g__Desulfurispora	0.831524
0.00809962	7.18752e-05	0.00520484	7.18752e-05	0.739185	g__Dialister	0.963058
8.62503e-06	0	1.79688e-05	0	0.796515	g__Dielma	0.963058
0	0	0	0		g__DNF00809
1.4375e-06	0	0	0	0.165768	g__Dolosigranulum	0.831524
0.018845	0.0119313	0.0156756	0.0107993	0.532764	g__Dorea	0.855651
0.000289657	1.79688e-05	8.84065e-05	1.79688e-05	0.856229	g__DTU089	0.981192
0	0	3.59376e-07	0	0.49725	g__Duganella	0.831524
7.18752e-07	0	0	0	0.165768	g__Dyadobacter	0.831524
0	0	1.4375e-06	0	0.49725	g__Dysgonomonas	0.831524
1.07813e-05	0	9.34378e-06	0	0.597062	g__Eggerthella	0.918082
0.000324157	8.9844e-05	0.00045497	7.18752e-05	0.882638	g__Eisenbergiella	0.996618
0	0	3.23439e-06	0	0.49725	g__Elusimicrobium	0.831524
2.87501e-06	0	3.23439e-06	0	0.47947	g__Enhydrobacter	0.831524
0.0067613	3.59376e-05	0.000283548	1.79688e-05	0.0933644	g__Enterobacter	0.831524
0.000529002	3.59376e-05	0.0016499	8.9844e-05	0.179822	g__Enterococcus	0.831524
0	0	4.31251e-06	0	0.323839	g__Enterorhabdus	0.831524
0.000130094	0	0.000284626	0	0.169439	g__Epulopiscium	0.831524
0.00029972	0.000107813	0.000462158	7.18752e-05	0.529105	g__Erysipelatoclostridium	0.855651
0.00429454	0.000772659	0.00775354	0.00287501	0.333666	g__Erysipelotrichaceae_UCG_003	0.831524
1.86876e-05	0	2.80313e-05	0	0.836722	g__Erysipelotrichaceae_UCG_004	0.977328
6.82815e-05	0	2.94688e-05	0	0.755121	g__Erysipelotrichaceae_UCG_006	0.963058
7.18752e-07	0	3.59376e-06	0	0.643294	g__Erysipelotrichaceae_UCG_009	0.927392
0.00738949	0.000628908	0.0117886	0.00067383	0.731701	g__Escherichia_Shigella	0.963058
0	0	0	0		g__Ethanoligenens
0.000467908	0	0.000175016	1.79688e-05	0.599004	g__Eubacterium	0.918082
4.31251e-06	0	1.00625e-05	0	0.485759	g__Ezakiella	0.831524
4.31251e-06	0	1.4375e-06	0	0.351425	g__F0332	0.831524
0	0	7.18752e-07	0	0.323795	g__Facklamia	0.831524
0.0555574	0.0425142	0.0473205	0.0401064	0.319905	g__Faecalibacterium	0.831524
5.89377e-05	0	3.95314e-06	0	0.016257	g__Faecalicoccus	0.831524
0.000311938	0	0.000124344	0	0.399488	g__Faecalitalea	0.831524
0.00151944	0.00115	0.00239344	0.00188672	0.0885946	g__Family_XIII_AD3011_group	0.831524
0.000414001	0.000215626	0.000427658	0.000233594	0.941721	g__Family_XIII_UCG_001	1
7.18752e-07	0	0	0	0.165768	g__Fastidiosipila	0.831524
0	0	1.07813e-06	0	0.49725	g__Filifactor	0.831524
6.46877e-06	0	7.90627e-06	0	0.714791	g__Finegoldia	0.959086
0	0	0	0		g__Firmicutes_bacterium_CAG_345
0	0	0	0		g__Firmicutes_bacterium_CAG_822
0	0	2.51563e-06	0	0.49725	g__Flavisolibacter	0.831524
0.00042047	0.000377345	0.000559908	0.000242579	0.664895	g__Flavonifractor	0.938463
0	0	0	0		g__Fluviicola
0.000231438	3.59376e-05	0.00028822	7.18752e-05	0.46456	g__Fournierella	0.831524
0	0	1.07813e-06	0	0.323839	g__Fretibacterium	0.831524
0	0	2.51563e-06	0	0.323839	g__Fructobacillus	0.831524
0.0105132	0.0033961	0.00793215	0.00303673	0.698187	g__Fusicatenibacter	0.949122
0.00446561	1.79688e-05	0.000950909	1.79688e-05	0.876092	g__Fusobacterium	0.993217
0	0	0	0		g__Gallicola
0	0	2.15626e-06	0	0.323839	g__Gardnerella	0.831524
0.000134407	5.39064e-05	0.00025911	0.000188672	0.0521648	g__GCA_900066225	0.831524
0.000403939	0.000269532	0.000539783	0.000377345	0.282679	g__GCA_900066575	0.831524
1.4375e-05	0	2.51563e-05	0	0.441868	g__GCA_900066755	0.831524
0.000194782	8.9844e-05	0.000210954	7.18752e-05	0.821121	g__Gemella	0.971581
9.5594e-05	3.59376e-05	6.75627e-05	1.79688e-05	0.468054	g__Geodermatophilus	0.831524
0	0	0	0		g__Georgenia
0	0	0	0		g__Glutamicibacter
5.03127e-06	0	8.26565e-06	0	0.560784	g__Gordonibacter	0.880639
2.87501e-06	0	3.59376e-06	0	0.667253	g__Granulicatella	0.938463
0.00293395	0.000269532	0.00173255	0.000592971	0.676161	g__gut_metagenome	0.938463
0.000447783	7.18752e-05	0.000333142	2.69532e-05	0.383161	g__Haemophilus	0.831524
6.61252e-05	0	0.000587221	0	0.538261	g__Hafnia_Obesumbacterium	0.861218
5.03127e-06	0	8.26565e-06	0	0.898239	g__Harryflintia	1
0	0	0	0		g__Helcococcus
0.00486236	1.79688e-05	0.00245741	1.79688e-05	0.281768	g__Holdemanella	0.831524
5.17502e-05	3.59376e-05	7.79846e-05	3.59376e-05	0.981642	g__Holdemania	1
0.000179688	0	0.000552361	0	0.454594	g__Howardella	0.831524
7.90627e-05	1.79688e-05	7.22346e-05	1.79688e-05	0.807953	g__Hungatella	0.966692
2.87501e-05	0	2.33594e-05	0	0.793539	g__Hydrogenoanaerobacterium	0.963058
0	0	3.95314e-06	0	0.323839	g__Hymenobacter	0.831524
0.00229713	0.000377345	0.0026946	0.000700783	0.37674	g__Intestinibacter	0.831524
8.26565e-05	0	0.000120391	1.79688e-05	0.0968647	g__Intestinimonas	0.831524
0	0	2.51563e-06	0	0.220629	g__Johnsonella	0.831524
2.15626e-06	0	1.4375e-06	0	0.233387	g__Kocuria	0.831524
1.15e-05	0	2.51563e-06	0	0.980935	g__Lachnoanaerobaculum	1
0.00506217	0.00222813	0.0112151	0.00309962	0.475407	g__Lachnoclostridium	0.831524
7.18752e-07	0	0	0	0.165768	g__Lachnoclostridium_10	0.831524
0.00629914	0.00319845	0.00572414	0.00267735	0.418348	g__Lachnospira	0.831524
0.00119744	0.000862503	0.000896643	0.000628908	0.368383	g__Lachnospiraceae_FCS020_group	0.831524
1.00625e-05	0	0.000162079	0	0.338108	g__Lachnospiraceae_FE2018_group	0.831524
0	0	0	0		g__Lachnospiraceae_NC2004_group
0.00185007	0.000503127	0.000993316	0.000503127	0.941699	g__Lachnospiraceae_ND3007_group	1
0	0	1.4375e-05	0	0.49725	g__Lachnospiraceae_NK3A20_group	0.831524
0.0122921	0.0119672	0.0118429	0.00553439	0.396117	g__Lachnospiraceae_NK4A136_group	0.831524
0	0	1.11407e-05	0	0.0367932	g__Lachnospiraceae_NK4B4_group	0.831524
0.00144541	0.000539064	0.00129339	0.000503127	0.946162	g__Lachnospiraceae_UCG_001	1
7.76252e-05	3.59376e-05	9.48753e-05	7.18752e-05	0.324827	g__Lachnospiraceae_UCG_002	0.831524
0.000686408	0	0.00125458	0	0.398538	g__Lachnospiraceae_UCG_003	0.831524
0.00156688	0.000413283	0.00185402	0.000853518	0.492352	g__Lachnospiraceae_UCG_004	0.831524
2.01251e-05	0	2.83907e-05	0	0.41405	g__Lachnospiraceae_UCG_007	0.831524
0.000400345	0.00014375	0.000373032	0.000125782	0.790094	g__Lachnospiraceae_UCG_008	0.963058
2.58751e-05	0	9.34378e-06	0	0.746616	g__Lachnospiraceae_UCG_009	0.963058
0.0010465	0.00044922	0.00127435	0.000368361	0.923853	g__Lachnospiraceae_UCG_010	1
0.0213606	0.000125782	0.00215087	0.000179688	0.287185	g__Lactobacillus	0.831524
0.000249407	7.18752e-05	0.00169338	0.000125782	0.332279	g__Lactococcus	0.831524
1.65313e-05	0	3.70157e-05	0	0.468918	g__Lactonifactor	0.831524
2.15626e-06	0	2.51563e-06	0	0.233387	g__Lautropia	0.831524
2.87501e-06	0	1.07813e-06	0	0.233358	g__Lawsonella	0.831524
0	0	4.31251e-06	0	0.220629	g__Leptotrichia	0.831524
0	0	1.07813e-06	0	0.49725	g__Leucobacter	0.831524
7.04377e-05	0	0.000118953	1.79688e-05	0.428373	g__Leuconostoc	0.831524
0	0	3.59376e-07	0	0.49725	g__Libanicoccus	0.831524
0	0	0	0		g__Luteibacter
3.30626e-05	0	9.41565e-05	7.18752e-05	0.0277645	g__Lysinibacillus	0.831524
0.000293251	0	0.000153813	0	0.0534215	g__Mailhella	0.831524
0	0	0	0		g__Marinilactibacillus
0	0	3.59376e-07	0	0.49725	g__Marmoricola	0.831524
0.000481564	0.000197657	0.000583627	0.000278516	0.532484	g__Marvinbryantia	0.855651
0	0	0	0		g__Massilia
0.000883347	0	0.00372062	0	0.329654	g__Megamonas	0.831524
0.0030892	0	0.00603393	3.59376e-05	0.0556817	g__Megasphaera	0.831524
1.58125e-05	0	3.16251e-05	0	0.28594	g__Merdibacter	0.831524
0.000455689	1.79688e-05	0.000714799	1.79688e-05	0.966975	g__metagenome	1
7.18752e-07	0	1.4375e-06	0	0.718216	g__Methanobacterium	0.960642
0.0104521	0.000341407	0.00743154	0.000251563	0.499419	g__Methanobrevibacter	0.831524
0	0	0	0		g__Methanomassiliicoccus
0.000452814	0	0.000445267	0	0.822636	g__Methanosphaera	0.971581
2.87501e-06	0	2.87501e-06	0	0.409778	g__Methylobacillus	0.831524
4.31251e-05	1.79688e-05	3.55782e-05	0	0.227891	g__Methylobacterium	0.831524
0	0	1.07813e-06	0	0.49725	g__Microbacterium	0.831524
0	0	1.79688e-06	0	0.220629	g__Micrococcus	0.831524
0.000654783	0	0.00150399	0	0.729017	g__Mitsuokella	0.963058
0	0	0	0		g__Mobiluncus
0	0	1.07813e-06	0	0.49725	g__Modestobacter	0.831524
0.000727377	0.000107813	0.000822971	7.18752e-05	0.834598	g__Mogibacterium	0.977328
0	0	7.18752e-07	0	0.49725	g__Moraxella	0.831524
7.18752e-07	0	7.18752e-07	0	1	g__Morganella	1
0.000175376	0.000125782	0.000183641	0.000125782	0.732553	g__Moryella	0.963058
0	0	3.59376e-07	0	0.49725	g__mouse_gut_metagenome	0.831524
0	0	0	0		g__Mucilaginibacter
0	0	0	0		g__Mucispirillum
3.59376e-06	0	2.87501e-06	0	1	g__Murdochiella	1
0	0	0	0		g__Muribaculum
2.37188e-05	0	1.18594e-05	0	0.189502	g__Murimonas	0.831524
0	0	3.59376e-07	0	0.49725	g__Musa_acuminata_subsp__malaccensis	0.831524
0	0	0	0		g__Mycobacterium
0.00178538	0.000503127	0.00100374	0.000278516	0.162605	g__Negativibacillus	0.831524
8.62503e-06	0	1.79688e-06	0	0.160568	g__Neisseria	0.831524
0	0	0	0		g__Neochlamydia
0	0	0	0		g__Nitrosomonas
7.18752e-07	0	1.07813e-06	0	1	g__Nocardioides	1
1.07813e-05	0	3.95314e-06	0	0.00425822	g__Novosphingobium	0.831524
0.000663408	0.000521095	0.000762237	0.000368361	0.861562	g__Odoribacter	0.984642
0.000190469	0	1.61719e-05	0	0.189418	g__Olsenella	0.831524
9.48753e-05	0	7.90627e-05	0	0.277246	g__Oribacterium	0.831524
0.00141019	0.000664846	0.00124416	0.000592971	0.677453	g__Oscillibacter	0.938463
0.000191907	8.9844e-05	0.000158125	1.79688e-05	0.296979	g__Oscillospira	0.831524
2.73126e-05	1.79688e-05	3.16251e-05	0	0.289748	g__Ottowia	0.831524
4.31251e-05	0	4.16876e-05	0	0.160007	g__Oxalobacter	0.831524
0	0	0	0		g__Paenarthrobacter
1.72501e-05	0	1.00625e-05	0	0.332987	g__Paeniclostridium	0.831524
0	0	1.07813e-06	0	0.49725	g__Pantanalinema_CENA516	0.831524
1.58125e-05	0	4.06095e-05	1.79688e-05	0.177982	g__Papillibacter	0.831524
0.00468195	0.00343204	0.0060465	0.00309962	0.822136	g__Parabacteroides	0.971581
0	0	7.18752e-07	0	0.323795	g__Paraclostridium	0.831524
0.0225279	0.0131891	0.0184694	0.00688205	0.2001	g__Paracoccus	0.831524
0	0	0	0		g__Paraeggerthella
2.87501e-06	0	0	0	0.165768	g__Parafrigoribacterium	0.831524
0.000746784	1.79688e-05	0.00270035	1.79688e-05	0.33529	g__Paraprevotella	0.831524
7.18752e-07	0	2.87501e-06	0	0.370028	g__Parascardovia	0.831524
0.00112628	0.000197657	0.00184432	0.000296485	0.332113	g__Parasutterella	0.831524
6.9719e-05	1.79688e-05	0.000904909	8.9844e-06	0.570464	g__Parvimonas	0.892534
6.75627e-05	0	9.2719e-05	0	0.669013	g__Pediococcus	0.938463
1.4375e-05	0	0	0	0.165768	g__Pedobacter	0.831524
0.00047222	0	0.000389564	1.79688e-05	0.248013	g__Peptococcus	0.831524
1.94063e-05	0	8.30159e-05	0	0.158954	g__Peptoniphilus	0.831524
1.72501e-05	0	0.000357579	0	0.208005	g__Peptostreptococcus	0.831524
0.0127277	0.0101524	0.0127654	0.00584885	0.791666	g__Phascolarctobacterium	0.963058
0	0	1.07813e-06	0	0.49725	g__Phocaeicola	0.831524
2.65938e-05	0	1.86876e-05	0	0.788214	g__Phocea	0.963058
0	0	0	0		g__Phreatobacter
2.15626e-06	0	3.59376e-07	0	0.214455	g__Phyllobacterium	0.831524
0	0	0	0		g__Phytophthora_multivora
0	0	3.59376e-07	0	0.49725	g__PMMR1	0.831524
3.73751e-05	0	4.67189e-06	0	0.809376	g__Polaromonas	0.966692
0	0	0	0		g__Porphyromonadaceae_bacterium_C941
5.75002e-06	0	1.83282e-05	0	0.812121	g__Porphyromonas	0.967246
7.90627e-06	0	1.36563e-05	0	0.602618	g__Prevotella	0.918082
0.00552002	1.79688e-05	0.0028441	1.79688e-05	0.647425	g__Prevotella_2	0.927392
0	0	5.03127e-06	0	0.220658	g__Prevotella_6	0.831524
0.00049522	0	0.00296952	0	0.834882	g__Prevotella_7	0.977328
0.101919	0.000395314	0.0404589	0.000368361	0.362413	g__Prevotella_9	0.831524
7.18752e-07	0	7.18752e-07	0	1	g__Prevotellaceae_Ga6A1_group	1
0.00054122	0	0.000767987	0	0.70771	g__Prevotellaceae_NK3B31_group	0.952599
0.000174657	0	0.000170344	0	0.336904	g__Prevotellaceae_UCG_001	0.831524
7.18752e-07	0	9.70316e-06	0	0.643294	g__Prevotellaceae_UCG_004	0.927392
0	0	1.4375e-06	0	0.323839	g__Propionibacterium	0.831524
3.45001e-05	0	1.07813e-06	0	0.452984	g__Proteus	0.831524
0	0	0	0		g__Providencia
0	0	0	0		g__Pseudoclavibacter
0.000163157	0	4.52814e-05	0	0.0851579	g__Pseudomonas	0.831524
0	0	3.59376e-07	0	0.49725	g__Pseudoramibacter	0.831524
7.18752e-07	0	0	0	0.165768	g__Pseudorhodoferax	0.831524
0	0	0	0		g__Pseudoxanthomonas
0	0	0	0		g__Psychrobacter
0	0	7.18752e-07	0	0.49725	g__Psychroglaciecola	0.831524
2.08438e-05	0	3.3422e-05	0	0.700445	g__Pygmaiobacter	0.949122
4.16876e-05	0	5.75002e-06	0	0.735411	g__Pyramidobacter	0.963058
2.15626e-06	0	0	0	0.165768	g__Ralstonia	0.831524
1.50938e-05	0	1.86876e-05	0	0.0917998	g__Raoultibacter	0.831524
0	0	0	0		g__RB41
0	0	1.79688e-06	0	0.49725	g__Rhizorhapis	0.831524
7.18752e-07	0	3.59376e-07	0	0.628899	g__Rhodococcus	0.920315
0	0	1.15e-05	0	0.49725	g__Rhodopseudomonas	0.831524
5.75002e-06	0	8.26565e-06	0	0.636929	g__Rikenella	0.927392
0.0011996	0	0.000450658	0	0.409244	g__Rikenellaceae_RC9_gut_group	0.831524
0.00274276	0.00100625	0.0049522	0.0019586	0.336505	g__Romboutsia	0.831524
0.00846834	0.00398907	0.00666715	0.00398009	0.866119	g__Roseburia	0.987189
1.4375e-06	0	3.59376e-07	0	0.614706	g__Roseomonas	0.918082
6.90002e-05	1.79688e-05	7.69065e-05	1.79688e-05	0.804928	g__Rothia	0.966692
0	0	7.18752e-07	0	0.49725	g__Rubellimicrobium	0.831524
0	0	0	0		g__Rubritepida
0	0	0	0		g__Rubrivirga
0	0	7.18752e-07	0	0.49725	g__Rubrobacter	0.831524
0	0	0	0		g__rumen_bacterium_YS2
6.54065e-05	5.39064e-05	8.51721e-05	5.39064e-05	1	g__Ruminiclostridium	1
1.72501e-05	0	2.94688e-05	0	0.772063	g__Ruminiclostridium_1	0.963058
0.00282757	0.00201251	0.00263351	0.00203048	0.848462	g__Ruminiclostridium_5	0.977576
0.00223963	0.000323439	0.00329368	0.000521095	0.693681	g__Ruminiclostridium_6	0.949122
0.00143175	0.0010961	0.00153274	0.00112305	0.986547	g__Ruminiclostridium_9	1
0.0035686	0.0019586	0.00398117	0.00256055	0.795999	g__Ruminococcaceae_NK4A214_group	0.963058
0.0186107	0.0106914	0.0235869	0.0179329	0.510861	g__Ruminococcaceae_UCG_002	0.838778
0.00119313	0.000682815	0.000958097	0.000251563	0.320593	g__Ruminococcaceae_UCG_003	0.831524
0.00152016	0.000952347	0.00192626	0.00148243	0.137883	g__Ruminococcaceae_UCG_004	0.831524
0.00546611	0.00264141	0.00589233	0.00459103	1	g__Ruminococcaceae_UCG_005	1
8.4094e-05	3.59376e-05	0.00017286	5.39064e-05	0.311921	g__Ruminococcaceae_UCG_007	0.831524
0.00126932	1.79688e-05	0.000730971	1.79688e-05	0.654621	g__Ruminococcaceae_UCG_008	0.928292
0.000147344	8.9844e-05	0.000235751	8.08596e-05	0.763509	g__Ruminococcaceae_UCG_009	0.963058
0.00121397	0.000107813	0.00242471	0.000682815	0.199623	g__Ruminococcaceae_UCG_010	0.831524
2.15626e-06	0	2.87501e-06	0	0.960246	g__Ruminococcaceae_UCG_011	1
0	0	0	0		g__Ruminococcaceae_UCG_012
0.00251995	0.00170704	0.00406347	0.00172501	0.946231	g__Ruminococcaceae_UCG_013	1
0.00660533	0.00318048	0.0106519	0.00278516	0.774214	g__Ruminococcaceae_UCG_014	0.963058
0	0	1.4375e-06	0	0.49725	g__Ruminococcaceae_V9D2013_group	0.831524
0.00958744	0.00490548	0.0103353	0.00643283	0.982065	g__Ruminococcus_1	1
0.0342931	0.023036	0.0723492	0.0521455	0.0280018	g__Ruminococcus_2	0.831524
7.18752e-07	0	3.59376e-07	0	0.628899	g__S5_A14a	0.920315
1.00625e-05	0	2.26407e-05	0	0.679163	g__Sanguibacteroides	0.938463
7.90627e-06	0	6.82815e-06	0	0.968224	g__Scardovia	1
0	0	1.07813e-06	0	0.49725	g__Schrenkiella_parvula	0.831524
0.00132682	0	7.18752e-07	0	0.075881	g__Schwartzia	0.831524
0	0	9.34378e-06	0	0.49725	g__Scytonema_UTEX_2349	0.831524
0	0	5.39064e-06	0	0.49725	g__Selenomonas	0.831524
2.87501e-06	0	2.15626e-06	0	1	g__Selenomonas_3	1
0	0	0	0		g__Selenomonas_4
0.00133257	5.39064e-05	0.001449	3.59376e-05	0.789142	g__Sellimonas	0.963058
1.00625e-05	0	5.75002e-06	0	0.116081	g__Senegalimassilia	0.831524
7.18752e-07	0	1.40157e-05	0	0.18266	g__Serratia	0.831524
0	0	0	0		g__Shewanella
3.09063e-05	0	1.79688e-05	0	1	g__Shuttleworthia	1
1.4375e-06	0	7.18752e-07	0	0.986794	g__Slackia	1
0	0	3.59376e-07	0	0.49725	g__Solibacillus	0.831524
0	0	0	0		g__Solirubrobacter
5.67814e-05	0	0.000179688	0	0.787946	g__Solobacterium	0.963058
0	0	2.15626e-06	0	0.49725	g__Sphingoaurantiacus	0.831524
0	0	0	0		g__Sphingobacterium
0.0583584	0.0360454	0.0472928	0.021329	0.165131	g__Sphingomonas	0.831524
0	0	7.18752e-07	0	0.49725	g__Spirosoma	0.831524
2.15626e-06	0	6.10939e-06	0	0.211799	g__Sporobacter	0.831524
0	0	0	0		g__Sporosarcina
1.15e-05	0	9.73909e-05	0	0.90541	g__Staphylococcus	1
0	0	2.87501e-06	0	0.220629	g__Stenotrophomonas	0.831524
0	0	1.4375e-06	0	0.323795	g__Stomatobaculum	0.831524
0.0391763	0.00982894	0.036844	0.00983792	0.923892	g__Streptococcus	1
0.0299123	0.0284087	0.0264734	0.0152915	0.19232	g__Subdoligranulum	0.831524
0	0	4.70783e-05	0	0.49725	g__Succinatimonas	0.831524
3.09063e-05	0	5.39064e-06	0	0.0853307	g__Succiniclasticum	0.831524
0.00263854	0	0.00210379	0	0.516323	g__Succinivibrio	0.838778
0.00174801	0.000323439	0.00143391	0.00067383	0.851993	g__Sutterella	0.978983
5.75002e-05	0	7.18752e-06	0	0.198178	g__Synergistes	0.831524
1.4375e-06	0	1.15e-05	0	0.132681	g__Syntrophococcus	0.831524
3.59376e-06	0	1.07813e-06	0	0.725577	g__Syntrophomonas	0.963058
0.000581471	3.59376e-05	0.000598361	3.59376e-05	0.839777	g__Terrisporobacter	0.977576
0	0	2.15626e-06	0	0.323795	g__Tetrasphaera	0.831524
0	0	0	0		g__Thermomonas
0	0	0	0		g__TM7_phylum_sp__oral_clone_FR058
0	0	1.72501e-05	0	0.0749303	g__Treponema_2	0.831524
7.18752e-07	0	0	0	0.165768	g__Tropheryma	0.831524
0	0	1.4375e-06	0	0.49725	g__Truepera	0.831524
0.000396032	5.39064e-05	0.00048372	3.59376e-05	0.890341	g__Turicibacter	1
0.000258751	1.79688e-05	8.33753e-05	1.79688e-05	0.795716	g__Tyzzerella	0.963058
0.000661252	0	0.000485158	0	0.700649	g__Tyzzerella_3	0.949122
0.000495939	1.79688e-05	0.000459283	0	0.252809	g__Tyzzerella_4	0.831524
0.000640408	0.000197657	0.00080069	0.000350392	0.108849	g__UBA1819	0.831524
0	0	0	0		g__un_c__Actinobacteria
7.18752e-07	0	5.71408e-05	0	0.246835	g__un_c__Alphaproteobacteria	0.831524
0	0	0	0		g__un_c__Bacilli
0.000205563	8.9844e-05	0.000187954	0.000116797	0.591234	g__un_c__Clostridia	0.918082
0	0	0	0		g__un_c__Gammaproteobacteria
0	0	3.59376e-07	0	0.49725	g__un_f__67_14	0.831524
0	0	3.59376e-07	0	0.49725	g__un_f__Acetobacteraceae	0.831524
0	0	3.59376e-07	0	0.49725	g__un_f__Acidaminococcaceae	0.831524
0	0	0	0		g__un_f__Actinomycetaceae
0	0	0	0		g__un_f__Bacillaceae
0	0	3.59376e-07	0	0.49725	g__un_f__Bacteroidales_RF16_group	0.831524
0.000104938	0	0.000209876	0	0.405673	g__un_f__Barnesiellaceae	0.831524
0	0	3.59376e-07	0	0.49725	g__un_f__Beijerinckiaceae	0.831524
0	0	0	0		g__un_f__Burkholderiaceae
1.4375e-06	0	0	0	0.165768	g__un_f__Caulobacteraceae	0.831524
0.00035722	0.000215626	0.000337454	0.000242579	1	g__un_f__Christensenellaceae	1
0	0	0	0		g__un_f__Chroococcidiopsaceae
0	0	1.07813e-06	0	0.323839	g__un_f__Clostridiaceae_1	0.831524
0.000746784	5.39064e-05	0.000859268	5.39064e-05	0.481772	g__un_f__Clostridiales_vadinBB60_group	0.831524
0.000663408	0.000251563	0.00126716	0.000170704	0.646551	g__un_f__Coriobacteriales_Incertae_Sedis	0.927392
0.000234313	1.79688e-05	9.09222e-05	0	0.299527	g__un_f__Desulfovibrionaceae	0.831524
1.07813e-05	0	4.27658e-05	0	0.460794	g__un_f__Eggerthellaceae	0.831524
1.4375e-06	0	3.59376e-07	0	0.220544	g__un_f__Enterobacteriaceae	0.831524
0.000136563	0	4.06095e-05	0	0.933127	g__un_f__Erysipelotrichaceae	1
0	0	0	0		g__un_f__Eubacteriaceae
8.4094e-05	0	4.2047e-05	0	0.256451	g__un_f__Family_XIII	0.831524
4.24064e-05	0	0.000187594	0	0.950593	g__un_f__Flavobacteriaceae	1
0	0	0	0		g__un_f__Ilumatobacteraceae
0.00989866	0.00930784	0.0106336	0.00977503	0.653022	g__un_f__Lachnospiraceae	0.928292
2.58751e-05	0	9.16409e-05	0	0.7464	g__un_f__Methanomethylophilaceae	0.963058
7.18752e-07	0	3.59376e-07	0	0.628899	g__un_f__Microbacteriaceae	0.920315
3.59376e-06	0	1.07813e-06	0	0.470549	g__un_f__Micrococcaceae	0.831524
7.18752e-07	0	0	0	0.165768	g__un_f__Mitochondria	0.831524
0.000245813	1.79688e-05	0.000107094	1.79688e-05	0.679501	g__un_f__Muribaculaceae	0.938463
7.18752e-07	0	0	0	0.165768	g__un_f__Neisseriaceae	0.831524
0	0	3.59376e-07	0	0.49725	g__un_f__Oligoflexaceae	0.831524
5.75002e-06	0	2.26407e-05	0	0.654192	g__un_f__Pasteurellaceae	0.928292
0.000207001	0.000107813	0.000277079	0.000116797	0.706	g__un_f__Peptococcaceae	0.952599
2.80313e-05	0	2.33594e-05	0	0.260819	g__un_f__Peptostreptococcaceae	0.831524
0	0	0	0		g__un_f__Planococcaceae
0.0012075	0	0.00182815	0	0.989672	g__un_f__Prevotellaceae	1
0	0	7.18752e-07	0	0.49725	g__un_f__Promicromonosporaceae	0.831524
6.25314e-05	0	0.000102782	0	0.790615	g__un_f__Puniceicoccaceae	0.963058
0	0	0	0		g__un_f__Rhizobiaceae
8.62503e-06	0	5.75002e-06	0	0.222014	g__un_f__Rhodobacteraceae	0.831524
0	0	3.59376e-07	0	0.49725	g__un_f__Rhodothermaceae	0.831524
0.00459067	0.00380939	0.00581866	0.0040879	0.510858	g__un_f__Ruminococcaceae	0.838778
2.87501e-06	0	1.07813e-06	0	0.725577	g__un_f__Saccharimonadaceae	0.963058
7.18752e-07	0	0	0	0.165768	g__un_f__Sphingomonadaceae	0.831524
0	0	0	0		g__un_f__Tepidisphaeraceae
3.80939e-05	0	8.62503e-05	0	0.992974	g__un_f__vadinBE97	1
7.90627e-06	0	6.82815e-06	0	1	g__un_f__Veillonellaceae	1
0	0	3.59376e-07	0	0.49725	g__un_f__Verrucomicrobiaceae	0.831524
4.95939e-05	0	0.000112485	0	0.988026	g__un_f__Victivallaceae	1
0	0	0	0		g__un_f__WD2101_soil_group
3.59376e-06	0	3.19845e-05	0	0.0105661	g__un_k__Bacteria	0.831524
0	0	2.51563e-06	0	0.49725	g__un_o__Armatimonadales	0.831524
0	0	3.59376e-07	0	0.49725	g__un_o__Bacillales	0.831524
0.000248688	0	0.000159563	0	0.844455	g__un_o__Bacteroidales	0.977576
0	0	0	0		g__un_o__Betaproteobacteriales
0.00027097	0.000197657	0.000429814	0.000359376	0.0812201	g__un_o__Clostridiales	0.831524
7.18752e-06	0	2.26407e-05	0	0.459485	g__un_o__Coriobacteriales	0.831524
0	0	0	0		g__un_o__Frankiales
0	0	0	0		g__un_o__Gaiellales
1.00625e-05	0	6.07346e-05	0	0.456026	g__un_o__Gastranaerophilales	0.831524
2.15626e-06	0	6.72033e-05	0	0.0624635	g__un_o__Izimaplasmatales	0.831524
0	0	3.59376e-07	0	0.49725	g__un_o__Lactobacillales	0.831524
0.000649033	1.79688e-05	0.00102638	8.9844e-05	0.213377	g__un_o__Mollicutes_RF39	0.831524
0	0	1.79688e-06	0	0.49725	g__un_o__Oxyphotobacteria_Incertae_Sedis	0.831524
7.18752e-07	0	9.91878e-05	0	0.251382	g__un_o__Rhodospirillales	0.831524
7.18752e-07	0	3.59376e-07	0	0.628899	g__un_o__Saccharimonadales	0.920315
0	0	3.59376e-07	0	0.49725	g__un_o__Selenomonadales	0.831524
0	0	0	0		g__un_o__WCHB1_41
0	0	0	0		g__un_p__BRC1
0	0	0	0		g__un_p__FBP
4.31251e-06	0	7.5469e-06	0	0.797249	g__un_p__Firmicutes	0.963058
0	0	3.59376e-07	0	0.49725	g__un_p__Proteobacteria	0.831524
7.90627e-06	0	3.09063e-05	0	0.739954	g__unidentified	0.963058
1.4375e-06	0	5.75002e-06	0	0.986795	g__Varibaculum	1
0.00119241	0.000287501	0.000845612	0.000197657	0.23742	g__Veillonella	0.831524
0	0	1.4375e-06	0	0.323839	g__Vibrio	0.831524
8.33753e-05	0	8.58909e-05	0	0.756711	g__Victivallis	0.963058
0	0	0	0		g__W5053
7.90627e-06	0	0	0	0.165768	g__wallaby_gut_metagenome	0.831524
1.36563e-05	0	1.22188e-05	0	0.842053	g__Weissella	0.977576
