# Supplementary material for: Leveraging Fecal Bacterial Survey Data to Predict Colorectal Tumors
Source: Front Genet. 2019 May 28;10:447. doi: 10.3389/fgene.2019.00447 (PMC6547015; doi:10.3389/fgene.2019.00447)
Supplement: Supplementary file 6 [file Table_4.XLSX]

## Sheet: Baxter_16AdvadnGenusWilcoxTest
Supplementary Table4: The Wilcoxon test results of the relative abundance of genera for the advance adenoma versus the normal within the each study.
Adv_Adenoma_mean	Adv_Adenoma_median	Normal_mean	Normal_median	pvalue	measures	FDR
0.000114091	0	0.000444157	0	0.192218	g__Bacteroides_pectinophilus_group	0.696385
0.0002347	0	0.000305998	0	0.461804	g__Clostridium_innocuum_group	0.832489
0.000409096	0.000176025	0.000247664	0	0.0764386	g__Eubacterium_brachy_group	0.696385
0.0217326	0.0130259	0.0203698	0.0151382	0.841358	g__Eubacterium_coprostanoligenes_group	0.938684
0.00209275	0.000352051	0.00229652	0.000792114	0.31241	g__Eubacterium_eligens_group	0.776598
1.30389e-05	0	9.21063e-06	0	0.644248	g__Eubacterium_fissicatena_group	0.884628
0.032154	0.0222672	0.0250887	0.0192748	0.0728552	g__Eubacterium_hallii_group	0.696385
0.000541115	0	0.000301904	0	0.228334	g__Eubacterium_nodatum_group	0.719056
0	0	0	0		g__Eubacterium_oxidoreducens_group
0.00124196	0	0.00172955	0	0.604736	g__Eubacterium_ruminantium_group	0.884628
0	0	0	0		g__Eubacterium_saphenum_group
0.0013805	0.000880127	0.00155762	0.00105615	0.46982	g__Eubacterium_ventriosum_group	0.842745
0.00110016	0.000176025	0.00198643	0.000528076	0.0477308	g__Eubacterium_xylanophilum_group	0.696385
1.62986e-06	0	0	0	0.209609	g__Eubacterium_yurii_group	0.696385
0.00451309	0.000880127	0.0041673	0.00167224	0.0962037	g__Ruminococcus_gauvreauii_group	0.696385
0.00293539	0.000176025	0.00983695	0.000352051	0.354207	g__Ruminococcus_gnavus_group	0.808678
0.0165089	0.0117937	0.0171962	0.0116177	0.957676	g__Ruminococcus_torques_group	0.974648
3.25973e-06	0	1.0234e-05	0	0.644767	g__A2	0.884628
4.88959e-06	0	0	0	0.074634	g__Abiotrophia	0.696385
3.42272e-05	0	3.68425e-05	0	0.84549	g__Acetanaerobacterium	0.938684
1.62986e-06	0	0	0	0.209609	g__Acetatifactor	0.696385
4.40063e-05	0	4.60531e-05	0	0.540404	g__Acetitomaculum	0.865508
0.00195584	0	0.00260354	0	0.521141	g__Acidaminococcus	0.862208
4.88959e-06	0	0	0	0.209609	g__Acidobacterium	0.696385
9.77919e-06	0	1.0234e-05	0	0.755625	g__Acinetobacter	0.904051
0.000818192	0.000352051	0.000581293	0.000352051	0.687927	g__Actinomyces	0.901578
0	0	0	0		g__Actinotignum
0.000694322	0.000176025	0.000986561	0.000264038	0.281783	g__Adlercreutzia	0.76829
0	0	1.22808e-05	0	0.432413	g__Aerococcus	0.808678
0	0	1.0234e-06	0	0.432413	g__Aeromonas	0.808678
0.0311777	0.0202429	0.0322464	0.0234114	0.373444	g__Agathobacter	0.808678
0.0343527	0.0123218	0.0277752	0.00748108	0.0979984	g__Akkermansia	0.696385
0.030943	0.0190107	0.03341	0.0221792	0.52966	g__Alistipes	0.863336
0	0	0	0		g__Aliterella_CENA595
0	0	0	0		g__Alkanindiges
6.68244e-05	0	5.21936e-05	0	0.449359	g__Allisonella	0.821087
0	0	2.76319e-05	0	0.263806	g__Allobaculum	0.754779
0.000673134	0	0.000357168	0	0.604802	g__Alloprevotella	0.884628
9.77919e-06	0	0	0	0.074634	g__Allorhizobium_Neorhizobium_Pararhizobium_Rhizobium	0.696385
1.14091e-05	0	1.0234e-06	0	0.131421	g__Alloscardovia	0.696385
7.98634e-05	0	1.43276e-05	0	0.731824	g__Anaerococcus	0.901578
0	0	2.04681e-06	0	0.432413	g__Anaerocolumna	0.808678
5.86751e-05	0	5.52638e-05	0	0.617914	g__Anaerofilum	0.884628
6.35647e-05	0	7.06148e-05	0	0.449506	g__Anaerofustis	0.821087
0	0	1.0234e-06	0	0.432413	g__Anaeroglobus	0.808678
3.09674e-05	0	0.000136113	0	0.563208	g__Anaeroplasma	0.880644
9.77919e-06	0	3.07021e-05	0	0.305505	g__Anaerosporobacter	0.776598
0	0	0	0		g__Anaerosporomusa
0.0287166	0.0167224	0.0309641	0.020947	0.0954897	g__Anaerostipes	0.696385
0.000146688	0	0.000231289	0	0.186442	g__Anaerotruncus	0.696385
0	0	0	0		g__Anaerovibrio
1.62986e-06	0	2.04681e-06	0	0.854949	g__Anaerovorax	0.938684
9.77919e-06	0	8.18723e-06	0	0.962286	g__Angelakisella	0.976866
0	0	0	0		g__Arachis_hypogaea_var__vulgaris
0	0	1.0234e-06	0	0.432413	g__Arthrospira_PCC_7345	0.808678
0	0	1.0234e-06	0	0.432413	g__ASF356	0.808678
4.88959e-06	0	4.09361e-06	0	0.642126	g__Asteroleplasma	0.884628
2.4448e-05	0	1.84213e-05	0	0.547296	g__Atopobium	0.869617
4.07466e-05	0	7.16382e-05	0	0.34893	g__Azospirillum_sp__47_25	0.808678
2.60778e-05	0	2.66085e-05	0	0.581671	g__Bacillus	0.880644
0	0	0	0		g__bacterium_YC_LK_LKJ22
2.11882e-05	0	1.0234e-06	0	0.739411	g__Bacteroidales_bacterium_55_9	0.901578
0.141387	0.102271	0.156912	0.136772	0.112403	g__Bacteroides	0.696385
0	0	0	0		g__Bacteroidetes_bacterium_OLB10
0.00461578	0.000176025	0.0058641	0.000176025	0.773651	g__Barnesiella	0.917427
0	0	0	0		g__Bergeyella
0.0220684	0.00422461	0.0190537	0.00440063	0.702299	g__Bifidobacterium	0.901578
0.000904575	0.000176025	0.00100601	0.000176025	0.285251	g__Bilophila	0.76829
0.136617	0.106935	0.128295	0.103855	0.483145	g__Blautia	0.851861
0	0	1.0234e-06	0	0.432413	g__Brachybacterium	0.808678
3.25973e-06	0	0	0	0.209609	g__Brachyspira	0.696385
0	0	1.0234e-06	0	0.432413	g__Bradyrhizobium	0.808678
0	0	1.0234e-06	0	0.432413	g__Brochothrix	0.808678
0	0	0	0		g__Bulleidia
0.00302503	0.0021123	0.00318278	0.00228833	0.851966	g__Butyricicoccus	0.938684
0.00123707	0	0.00087194	0	0.735476	g__Butyricimonas	0.901578
0.000174395	0	0.000427783	0	0.610798	g__Butyrivibrio	0.884628
0.00059653	0	0.000488163	0	0.878318	g__CAG_352	0.941557
0.00147014	0.000176025	0.00129768	0	0.951589	g__CAG_56	0.973381
3.25973e-05	0	7.67552e-05	0	0.747272	g__CAG_873	0.901578
0	0	0	0		g__Caldicoprobacter
0	0	0	0		g__Calditerricola
4.40063e-05	0	1.84213e-05	0	0.797598	g__Campylobacter	0.937528
0	0	0	0		g__candidate_division_SR1_bacterium_taxon_345
0	0	0	0		g__Candidatus_Alysiosphaera
0	0	6.14042e-06	0	0.263803	g__Candidatus_Arthromitus	0.754779
3.25973e-06	0	0.00014123	0	0.854952	g__Candidatus_Gastranaerophilales_bacterium_Zag_111	0.938684
1.46688e-05	0	6.3451e-05	0	0.826924	g__Candidatus_Melainabacteria_bacterium_MEL_A1	0.938684
0	0	0	0		g__Candidatus_Methanomethylophilus
3.25973e-06	0	0	0	0.0746322	g__Candidatus_Saccharimonas	0.696385
0.000179285	0	0.000154534	0	0.638316	g__Candidatus_Soleaferrea	0.884628
0.000164616	0	0.000314185	0	0.575024	g__Candidatus_Stoquefichus	0.880644
9.77919e-06	0	1.22808e-05	0	0.567386	g__Capnocytophaga	0.880644
4.40063e-05	0	4.40063e-05	0	0.67531	g__Caproiciproducens	0.901578
0	0	1.0234e-06	0	0.432413	g__Cardiobacterium	0.808678
0.000197214	0	0.000109504	0	0.420162	g__Carnobacterium	0.808678
5.54154e-05	0	5.8334e-05	0	0.945103	g__Catabacter	0.972237
0.00251162	0	0.00126186	0	0.0677355	g__Catenibacterium	0.696385
0	0	2.04681e-06	0	0.432413	g__Catenisphaera	0.808678
0	0	0	0		g__Catonella
3.09674e-05	0	0	0	0.074634	g__Cellulosilyticum	0.696385
8.96425e-05	0	0.000321349	0	0.102222	g__Cercis_gigantea	0.696385
0	0	6.14042e-06	0	0.432413	g__Cetobacterium	0.808678
6.51946e-06	0	9.21063e-06	0	0.816016	g__CHKCI001	0.938684
2.28181e-05	0	4.19595e-05	0	0.142672	g__CHKCI002	0.696385
0.0122435	0.00501672	0.014387	0.0055448	0.855493	g__Christensenellaceae_R_7_group	0.938684
1.62986e-06	0	1.0234e-06	0	0.743337	g__Chryseobacterium	0.901578
0	0	0	0		g__Chthoniobacter
0.000762777	0	0.000710242	0	0.222761	g__Cloacibacillus	0.719056
0	0	3.07021e-06	0	0.263806	g__Cloacibacterium	0.754779
0.000151577	0	8.49425e-05	0	0.269155	g__Clostridiales_bacterium_enrichment_culture_clone_06_1235251_67	0.761974
1.79285e-05	0	0.000156581	0	0.751315	g__Clostridioides	0.901578
0.00905716	0.00281641	0.00971824	0.00202429	0.656493	g__Clostridium_sensu_stricto_1	0.897653
0	0	0	0		g__Clostridium_sensu_stricto_11
0	0	9.21063e-06	0	0.0505252	g__Clostridium_sensu_stricto_13	0.696385
0	0	0	0		g__Clostridium_sensu_stricto_18
7.82335e-05	0	3.07021e-06	0	0.152839	g__Clostridium_sensu_stricto_2	0.696385
0	0	1.0234e-06	0	0.432413	g__Clostridium_sensu_stricto_3	0.808678
3.25973e-06	0	1.0234e-06	0	0.739411	g__Clostridium_sensu_stricto_6	0.901578
0	0	0	0		g__Clostridium_sensu_stricto_9
2.4448e-05	0	6.3451e-05	0	0.737469	g__Clostridium_sp__CAG_306	0.901578
0.000195584	0	0.000115645	0	0.338397	g__Clostridium_sp__K4410_MGS_306	0.808678
0.0150518	0.00563281	0.0142314	0.00492871	0.507362	g__Collinsella	0.856973
0.000726919	0	0.0010408	0	0.20743	g__Coprobacter	0.696385
0.00153696	0.00105615	0.00142355	0.000792114	0.72629	g__Coprococcus_1	0.901578
0.00348791	0	0.0042942	0.000176025	0.386878	g__Coprococcus_2	0.808678
0.00700679	0.00360852	0.00591732	0.00316846	0.997573	g__Coprococcus_3	0.997573
8.14932e-06	0	3.07021e-05	0	0.94467	g__Coriobacteriaceae_UCG_002	0.972237
0	0	4.91234e-05	0	0.263806	g__Coriobacteriaceae_UCG_003	0.754779
2.11882e-05	0	3.47957e-05	0	0.164436	g__Corynebacterium	0.696385
1.46688e-05	0	2.04681e-06	0	0.0561056	g__Corynebacterium_1	0.696385
0	0	0	0		g__Criibacterium_bergeronii
0	0	0	0		g__Cryptobacterium
6.51946e-06	0	1.33042e-05	0	0.161194	g__Cuneatibacter	0.696385
9.77919e-06	0	2.04681e-06	0	0.739411	g__Cupriavidus	0.901578
0.000114091	0	0.00015044	0	0.228953	g__Defluviitaleaceae_UCG_011	0.719056
6.51946e-06	0	6.14042e-06	0	0.592355	g__Deinococcus	0.884628
0	0	0	0		g__Denitrobacterium
0	0	1.0234e-05	0	0.432413	g__Desulfitibacter	0.808678
0.00177166	0	0.00122501	0	0.0492889	g__Desulfovibrio	0.696385
0.00440389	0	0.00604422	0	0.525475	g__Dialister	0.862208
8.47529e-05	0	1.94447e-05	0	0.869604	g__Dielma	0.939345
0	0	0	0		g__Dietzia
4.88959e-06	0	2.86553e-05	0	0.747272	g__DNF00809	0.901578
0.0155261	0.00906531	0.012507	0.0102975	0.622657	g__Dorea	0.884628
0.000405836	0.000176025	0.000567989	0.000176025	0.636958	g__DTU089	0.884628
1.62986e-06	0	1.0234e-05	0	0.851616	g__Dysgonomonas	0.938684
0.000834491	0.000176025	0.000597667	0.000176025	0.380096	g__Eggerthella	0.808678
0	0	0	0		g__Eggerthia
2.11882e-05	0	1.0234e-06	0	0.739411	g__Eikenella	0.901578
0.0004857	8.80127e-05	0.000670329	0.000176025	0.545491	g__Eisenbergiella	0.869617
0	0	0	0		g__Elusimicrobium
6.51946e-06	0	4.19595e-05	0	0.728321	g__Enorma	0.901578
0.000554154	0	0.000183189	0	0.84798	g__Enterococcus	0.938684
0.00132671	0	0.00120045	0	0.840754	g__Enterorhabdus	0.938684
0	0	5.62872e-05	0	0.169703	g__Epulopiscium	0.696385
0	0	0	0		g__Eremococcus
0.00209112	0.000704101	0.00296685	0.000880127	0.301436	g__Erysipelatoclostridium	0.776598
0.00959012	0.00308044	0.00761514	0.00246435	0.453436	g__Erysipelotrichaceae_UCG_003	0.821087
1.62986e-05	0	1.0234e-06	0	0.0548403	g__Erysipelotrichaceae_UCG_004	0.696385
3.25973e-06	0	2.04681e-06	0	0.861628	g__Erysipelotrichaceae_UCG_006	0.938684
0	0	0	0		g__Erysipelotrichaceae_UCG_010
0.0104132	0.00132019	0.00979499	0.00105615	0.178357	g__Escherichia_Shigella	0.696385
0	0	0	0		g__Ethanoligenens
5.05258e-05	0	0.000142253	0	0.20667	g__Eubacterium	0.696385
1.46688e-05	0	7.16382e-06	0	0.492951	g__Ezakiella	0.856973
1.62986e-06	0	2.04681e-06	0	0.747272	g__F0058	0.901578
6.51946e-06	0	1.94447e-05	0	0.320685	g__F0332	0.776598
0.0337659	0.0299243	0.0398442	0.035029	0.185862	g__Faecalibacterium	0.696385
2.4448e-05	0	4.09361e-06	0	0.299649	g__Faecalibaculum	0.776598
0	0	7.16382e-06	0	0.169701	g__Faecalicoccus	0.696385
0.000648686	0.000176025	0.000873986	0	0.172366	g__Faecalitalea	0.696385
0.00226062	0.0014082	0.00226377	0.0014082	0.914752	g__Family_XIII_AD3011_group	0.967711
0.000260778	0.000176025	0.000276319	0.000176025	0.966205	g__Family_XIII_UCG_001	0.978251
0	0	0	0		g__Fastidiosipila
3.25973e-06	0	0	0	0.209609	g__Filifactor	0.696385
3.74869e-05	0	6.14042e-06	0	0.0832405	g__Finegoldia	0.696385
9.77919e-06	0	1.0234e-06	0	0.739411	g__Firmicutes_bacterium_CAG_822	0.901578
1.14091e-05	0	0	0	0.028567	g__Flavobacterium	0.696385
0.000286856	0	0.000642697	0.000176025	0.00574054	g__Flavonifractor	0.533115
3.25973e-06	0	0	0	0.0746322	g__Flexilinea	0.696385
0.0001255	0	0.000164768	0	0.865644	g__Fournierella	0.939345
3.91167e-05	0	0	0	0.209609	g__Fretibacterium	0.696385
0.017596	0.0126738	0.0199205	0.0145221	0.342105	g__Fusicatenibacter	0.808678
0.000655205	0	0.000132019	0	0.696831	g__Fusobacterium	0.901578
0	0	1.0234e-06	0	0.432413	g__Gallicola	0.808678
8.14932e-06	0	2.04681e-06	0	0.31984	g__Gardnerella	0.776598
0.000299895	0.000176025	0.000372519	0.000176025	0.792076	g__GCA_900066225	0.933767
0.000607939	0.000352051	0.000748108	0.000352051	0.522988	g__GCA_900066575	0.862208
1.79285e-05	0	3.78659e-05	0	0.0935916	g__GCA_900066755	0.696385
0.000110831	0	4.91234e-05	0	0.441988	g__Gemella	0.821087
4.88959e-06	0	0	0	0.209609	g__Geobacillus	0.696385
0	0	1.0234e-06	0	0.432413	g__Georgenia	0.808678
9.77919e-06	0	0	0	0.074634	g__Glutamicibacter	0.696385
0.000187434	0	0.000224125	0	0.18986	g__Gordonibacter	0.696385
1.30389e-05	0	4.09361e-06	0	0.276038	g__Granulicatella	0.76829
0.00220195	0.000176025	0.00296685	0.000176025	0.69245	g__gut_metagenome	0.901578
0.00347813	0.000176025	0.00305691	0.000176025	0.537068	g__Haemophilus	0.863605
0	0	0	0		g__Hafnia_Obesumbacterium
3.25973e-06	0	0	0	0.209609	g__Halococcus	0.696385
1.46688e-05	0	1.12574e-05	0	0.42547	g__Harryflintia	0.808678
0	0	0	0		g__Helcococcus
1.79285e-05	0	5.11702e-06	0	0.494603	g__Helicobacter	0.856973
0.00189064	0	0.00303848	0	0.394466	g__Holdemanella	0.808678
0.000166246	0	0.000179096	0	0.505386	g__Holdemania	0.856973
0.00024285	0	0.000164768	0	0.0856115	g__Howardella	0.696385
0.000202103	0	0.000355121	0	0.290498	g__Hungatella	0.76829
0	0	0	0		g__Hydrogenispora
4.88959e-05	0	5.3217e-05	0	0.767146	g__Hydrogenoanaerobacterium	0.915111
0	0	0	0		g__Hymenobacter
1.62986e-06	0	0	0	0.209609	g__Incertae_Sedis	0.696385
0.00362971	0.000352051	0.00485912	0.00105615	0.0489514	g__Intestinibacter	0.696385
0.00024285	0	0.000264038	0	0.777877	g__Intestinimonas	0.919725
0	0	0	0		g__iron_reducing_bacterium_enrichment_culture_clone_HN_HFO75
1.62986e-06	0	0	0	0.209609	g__Johnsonella	0.696385
0	0	0	0		g__Jonquetella
0.00152718	0	0.00192707	0	0.931912	g__Klebsiella	0.972237
3.25973e-06	0	4.09361e-06	0	0.747272	g__Kocuria	0.901578
0	0	1.0234e-06	0	0.432413	g__Lachnoanaerobaculum	0.808678
0.00627987	0.00378454	0.00649349	0.00334448	0.973384	g__Lachnoclostridium	0.978251
0	0	0	0		g__Lachnoclostridium_10
0.00179122	0.000528076	0.00191888	0.000968139	0.0119354	g__Lachnospira	0.533115
0.000977919	0.000528076	0.000930273	0.000352051	0.451759	g__Lachnospiraceae_FCS020_group	0.821087
0.000176025	0	0.000111551	0	0.0679645	g__Lachnospiraceae_FE2018_group	0.696385
0.00423765	0.0014082	0.00347138	0.00176025	0.709215	g__Lachnospiraceae_ND3007_group	0.901578
0	0	3.27489e-05	0	0.169703	g__Lachnospiraceae_NK3A20_group	0.696385
0.00588218	0.00352051	0.00699803	0.00457666	0.0812641	g__Lachnospiraceae_NK4A136_group	0.696385
0.000262408	0	0.000187283	0	0.534732	g__Lachnospiraceae_NK4B4_group	0.863605
0.000713881	0.000176025	0.00134578	0.000352051	0.162534	g__Lachnospiraceae_UCG_001	0.696385
6.19348e-05	0	7.26616e-05	0	0.639461	g__Lachnospiraceae_UCG_002	0.884628
0.000327603	0	9.92701e-05	0	0.127539	g__Lachnospiraceae_UCG_003	0.696385
0.000257519	0	0.000299857	0	0.155297	g__Lachnospiraceae_UCG_004	0.696385
1.62986e-06	0	1.0234e-06	0	0.743337	g__Lachnospiraceae_UCG_006	0.901578
1.62986e-06	0	9.21063e-05	0	0.747272	g__Lachnospiraceae_UCG_007	0.901578
4.07466e-05	0	0.000101317	0	0.25525	g__Lachnospiraceae_UCG_008	0.754779
0.00047918	0.000176025	0.000579246	0.000176025	0.871258	g__Lachnospiraceae_UCG_010	0.939345
0.00131693	0.000176025	0.00157809	0.000176025	0.807227	g__Lactobacillus	0.938684
0.00036183	0	0.000564919	0	0.0170211	g__Lactococcus	0.68425
3.25973e-06	0	1.0234e-06	0	0.317764	g__Lautropia	0.776598
9.94217e-05	0	7.16382e-06	0	0.636852	g__Lawsonella	0.884628
2.28181e-05	0	1.12574e-05	0	0.919234	g__Leptotrichia	0.969645
3.91167e-05	0	3.47957e-05	0	0.901624	g__Leuconostoc	0.95634
3.74869e-05	0	4.80999e-05	0	0.582715	g__Libanicoccus	0.880644
1.62986e-06	0	2.04681e-06	0	0.854949	g__Listeria	0.938684
0	0	0	0		g__Mailhella
0	0	2.04681e-06	0	0.432413	g__Marinilactibacillus	0.808678
0.000656835	0.000176025	0.000720476	0.000176025	0.773568	g__Marvinbryantia	0.917427
0.000914354	0	5.73106e-05	0	0.283794	g__Megamonas	0.76829
0.00305437	0	0.00170806	0	0.858214	g__Megasphaera	0.938684
9.77919e-05	0	9.41531e-05	0	0.490422	g__Merdibacter	0.856973
0.000871977	0	0.000579246	0	0.818581	g__metagenome	0.938684
0.0151708	0.000352051	0.0111121	0.000176025	0.0447302	g__Methanobrevibacter	0.696385
0	0	4.09361e-06	0	0.263803	g__Methanomassiliicoccus	0.754779
0.000792114	0	0.000849425	0	0.0824934	g__Methanosphaera	0.696385
1.62986e-06	0	0	0	0.209609	g__Methylobacillus	0.696385
4.23765e-05	0	4.91234e-05	0	0.971124	g__Methylobacterium	0.978251
3.25973e-06	0	0	0	0.209609	g__Micrococcus	0.696385
1.62986e-06	0	1.33042e-05	0	0.572541	g__Mitsuokella	0.880644
3.25973e-06	0	4.09361e-06	0	0.955195	g__Mobiluncus	0.97459
0.000787224	0	0.000316232	0	0.00244868	g__Mogibacterium	0.492185
3.91167e-05	0	1.0234e-06	0	0.132363	g__Morganella	0.696385
8.47529e-05	0	7.8802e-05	0	0.925992	g__Moryella	0.969645
0	0	0	0		g__Mucispirillum
8.14932e-06	0	2.04681e-06	0	0.634218	g__Murdochiella	0.884628
0	0	1.22808e-05	0	0.0748579	g__Muribaculum	0.696385
1.62986e-06	0	1.63745e-05	0	0.179358	g__Murimonas	0.696385
1.62986e-06	0	0	0	0.209609	g__Mycobacterium	0.696385
0	0	0	0		g__Mycoplasma
1.79285e-05	0	0	0	0.209609	g__Myroides	0.696385
0.001299	0.000352051	0.00145426	0.000440063	0.616555	g__Negativibacillus	0.884628
0	0	0	0		g__Negativicoccus
3.5857e-05	0	2.45617e-05	0	0.343092	g__Neisseria	0.808678
0	0	0	0		g__Ochrobactrum
0.00407792	0.000968139	0.00327898	0.000880127	0.499345	g__Odoribacter	0.856973
0	0	0	0		g__Oenococcus
0	0	0	0		g__Oikopleura_dioica
0	0	0	0		g__Oligoflexus
9.94217e-05	0	0.000104387	0	0.835238	g__Olsenella	0.938684
1.30389e-05	0	4.50297e-05	0	0.0333472	g__Oribacterium	0.696385
0.00102844	0.000264038	0.00110016	0.000528076	0.118006	g__Oscillibacter	0.696385
0.000114091	0	0.000100294	0	0.871581	g__Oscillospira	0.939345
1.46688e-05	0	2.14915e-05	0	0.580093	g__Ottowia	0.880644
0.000128759	0	0.000104387	0	0.491998	g__Oxalobacter	0.856973
1.62986e-06	0	0	0	0.209609	g__Paenarthrobacter	0.696385
8.47529e-05	0	1.22808e-05	0	0.815501	g__Paenibacillus	0.938684
0.000252629	0	0.00010234	0	0.804664	g__Paeniclostridium	0.938684
1.62986e-05	0	1.84213e-05	0	0.896805	g__Papillibacter	0.956274
0.0125826	0.00536877	0.0131149	0.00704101	0.277457	g__Parabacteroides	0.76829
0	0	9.21063e-06	0	0.169703	g__Paraclostridium	0.696385
4.88959e-06	0	5.11702e-06	0	0.854952	g__Paraeggerthella	0.938684
0.00508192	0	0.00455721	0	0.814543	g__Paraprevotella	0.938684
1.62986e-06	0	0	0	0.209609	g__Parascardovia	0.696385
0.00133812	0.000176025	0.00275807	0.000528076	0.00625046	g__Parasutterella	0.533115
0	0	0	0		g__Parcubacteria_group_bacterium_GW2011_GWA2_42_14
0	0	0.000108481	0	0.0748609	g__Parvibacter	0.696385
6.51946e-05	0	1.0234e-05	0	0.00979834	g__Parvimonas	0.533115
3.91167e-05	0	2.04681e-06	0	0.316643	g__Pediococcus	0.776598
0	0	3.47957e-05	0	0.263806	g__Peptoclostridium	0.754779
0.000500368	0	0.000257898	0	0.290459	g__Peptococcus	0.76829
3.5857e-05	0	1.12574e-05	0	0.143344	g__Peptoniphilus	0.696385
1.95584e-05	0	7.16382e-06	0	0.621788	g__Peptostreptococcus	0.884628
0.0122484	0.00387256	0.0124446	0.00589685	0.633092	g__Phascolarctobacterium	0.884628
1.62986e-06	0	0	0	0.209609	g__Phocaeicola	0.696385
3.25973e-05	0	6.75446e-05	0	0.0754663	g__Phocea	0.696385
9.77919e-06	0	0	0	0.209609	g__Phoenicibacter	0.696385
0	0	0	0		g__Planctomicrobium
0	0	0	0		g__Porphyrobacter
6.51946e-06	0	0	0	0.209609	g__Porphyromonadaceae_bacterium_C941	0.696385
0.000101052	0	2.55851e-05	0	0.0878712	g__Porphyromonas	0.696385
0.000105941	0	0.000119738	0	0.945634	g__Prevotella	0.972237
0.000508518	0	6.24276e-05	0	0.948601	g__Prevotella_2	0.9728
1.62986e-06	0	1.43276e-05	0	0.0401633	g__Prevotella_6	0.696385
0.00135442	0	0.000251757	0	0.53578	g__Prevotella_7	0.863605
0.0122305	0	0.0118162	0	0.249937	g__Prevotella_9	0.754779
1.62986e-06	0	0.000224125	0	0.848285	g__Prevotellaceae_Ga6A1_group	0.938684
0.00112624	0	0.00253906	0	0.524149	g__Prevotellaceae_NK3B31_group	0.862208
0.00161031	0	0.000735827	0	0.166132	g__Prevotellaceae_UCG_001	0.696385
0	0	8.18723e-06	0	0.432413	g__Prevotellaceae_UCG_003	0.808678
1.62986e-06	0	2.86553e-05	0	0.38475	g__Proteus	0.808678
1.62986e-06	0	3.07021e-06	0	0.747272	g__Providencia	0.901578
0.000109201	0	5.73106e-05	0	0.556684	g__Pseudobutyrivibrio	0.877596
3.91167e-05	0	5.01468e-05	0	0.44788	g__Pseudoflavonifractor	0.821087
0.000863828	0.000352051	0.00153306	0.000352051	0.24106	g__Pseudomonas	0.75121
1.62986e-06	0	0	0	0.209609	g__Pseudoramibacter	0.696385
0	0	0	0		g__Psychrobacter
6.0305e-05	0	3.68425e-05	0	0.182239	g__Pygmaiobacter	0.696385
8.96425e-05	0	1.22808e-05	0	0.0773029	g__Pyramidobacter	0.696385
0.00011898	0	8.18723e-06	0	0.811288	g__Ralstonia	0.938684
1.62986e-05	0	1.43276e-05	0	0.57305	g__Raoultibacter	0.880644
1.62986e-06	0	1.0234e-06	0	0.743337	g__Rhodobacter	0.901578
9.6162e-05	0	3.58191e-05	0	0.25448	g__Rikenella	0.754779
0.0015663	0	0.000124855	0	0.0911348	g__Rikenellaceae_RC9_gut_group	0.696385
0.0141652	0.00396057	0.0102842	0.00343249	0.520946	g__Romboutsia	0.862208
0.00702309	0.00457666	0.012945	0.00704101	0.000141589	g__Roseburia	0.0569187
0.000174395	0	0.000118715	0	0.259672	g__Rothia	0.754779
9.77919e-06	0	9.21063e-06	0	0.747272	g__rumen_bacterium_YS2	0.901578
0.000161357	0	8.90361e-05	0	0.750397	g__Ruminiclostridium	0.901578
0.000176025	0	0.000180119	0	0.689115	g__Ruminiclostridium_1	0.901578
0.00549753	0.00325647	0.00657127	0.00387256	0.228531	g__Ruminiclostridium_5	0.719056
0.00271535	0.000352051	0.00301085	0.000352051	0.619455	g__Ruminiclostridium_6	0.884628
0.000847529	0.000528076	0.00135601	0.000704101	0.011187	g__Ruminiclostridium_9	0.533115
0.00326136	0.000704101	0.00503207	0.000880127	0.724654	g__Ruminococcaceae_NK4A214_group	0.901578
0.0106821	0.00325647	0.0129931	0.00572082	0.481315	g__Ruminococcaceae_UCG_002	0.851861
0.00072203	0.000176025	0.000865799	0.000176025	0.732488	g__Ruminococcaceae_UCG_003	0.901578
0.00234212	0.00193628	0.00237737	0.0021123	0.926228	g__Ruminococcaceae_UCG_004	0.969645
0.00267624	0.00114416	0.00331173	0.00123218	0.596458	g__Ruminococcaceae_UCG_005	0.884628
2.4448e-05	0	2.35383e-05	0	0.523185	g__Ruminococcaceae_UCG_007	0.862208
0.000369979	0	0.000321349	0	0.721994	g__Ruminococcaceae_UCG_008	0.901578
7.66036e-05	0	0.000132019	0	0.317318	g__Ruminococcaceae_UCG_009	0.776598
0.00145221	0.000176025	0.00172341	0.000264038	0.701541	g__Ruminococcaceae_UCG_010	0.901578
1.79285e-05	0	4.09361e-06	0	0.0375356	g__Ruminococcaceae_UCG_011	0.696385
0.00416104	0.00281641	0.00406189	0.00272839	0.615611	g__Ruminococcaceae_UCG_013	0.884628
0.00891047	0.00105615	0.0105472	0.00167224	0.891023	g__Ruminococcaceae_UCG_014	0.952637
0	0	0	0		g__Ruminococcaceae_V9D2013_group
0.0111939	0.00466467	0.0103691	0.00607287	0.922594	g__Ruminococcus_1	0.969645
0.0364438	0.020771	0.0196831	0.00712903	0.00728923	g__Ruminococcus_2	0.533115
4.88959e-06	0	3.07021e-06	0	0.942038	g__S5_A14a	0.972237
2.4448e-05	0	5.11702e-06	0	0.0324894	g__Sanguibacteroides	0.696385
0.000296635	0	4.09361e-06	0	0.318246	g__Sarcina	0.776598
9.77919e-06	0	4.09361e-06	0	0.0750657	g__Scardovia	0.696385
0	0	0	0		g__Schrenkiella_parvula
1.79285e-05	0	0	0	0.209609	g__Sedimentibacter	0.696385
0	0	1.0234e-06	0	0.432413	g__Selenomonas	0.808678
4.88959e-06	0	5.11702e-06	0	0.576063	g__Selenomonas_3	0.880644
0	0	9.21063e-06	0	0.0505252	g__Selenomonas_4	0.696385
0.000427024	0	0.000667259	0	0.972998	g__Sellimonas	0.978251
0.000713881	0	0.000635533	0	0.58849	g__Senegalimassilia	0.882735
0	0	5.11702e-06	0	0.111906	g__Serratia	0.696385
0.000226551	0	0.000164768	0	0.828696	g__Shuttleworthia	0.938684
0.000265668	0	0.000731733	0	0.587685	g__Slackia	0.882735
0	0	0	0		g__Sneathia
0.00024285	0	6.24276e-05	0	0.145732	g__Solobacterium	0.696385
3.25973e-06	0	2.04681e-06	0	0.861628	g__Sphingobacterium	0.938684
1.62986e-06	0	3.07021e-06	0	0.57756	g__Sphingobium	0.880644
4.88959e-06	0	0	0	0.209609	g__Sphingomonas	0.696385
6.51946e-06	0	0	0	0.028567	g__Sporosarcina	0.696385
3.42272e-05	0	2.14915e-05	0	0.471686	g__Staphylococcus	0.842745
0	0	3.07021e-06	0	0.263806	g__Stenotrophomonas	0.754779
0	0	1.0234e-06	0	0.432413	g__Stomatobaculum	0.808678
0.0198501	0.00387256	0.0140073	0.00457666	0.98911	g__Streptococcus	0.991577
0.0253623	0.0214751	0.0234462	0.0190107	0.389024	g__Subdoligranulum	0.808678
0	0	1.0234e-06	0	0.432413	g__Succinatimonas	0.808678
0.000296635	0	0.000156581	0	0.900359	g__Succiniclasticum	0.95634
2.28181e-05	0	0.000562872	0	0.160549	g__Succinivibrio	0.696385
0.00149459	0	0.000849425	0	0.627185	g__Sutterella	0.884628
1.62986e-06	0	1.0234e-06	0	0.743337	g__Synechococcus_PCC_7942	0.901578
1.62986e-05	0	7.16382e-06	0	0.319834	g__Synergistes	0.776598
1.62986e-06	0	0	0	0.209609	g__Syntrophaceticus	0.696385
3.25973e-06	0	2.04681e-06	0	0.639477	g__Syntrophomonas	0.884628
0.00191346	0	0.00263731	0	0.944222	g__Terrisporobacter	0.972237
1.62986e-06	0	0	0	0.209609	g__Tetrasphaera	0.696385
3.25973e-06	0	0	0	0.209609	g__Thermus	0.696385
0	0	0	0		g__Tissierella
0	0	1.0234e-06	0	0.432413	g__TM7_phylum_sp__oral_clone_FR058	0.808678
0	0	1.0234e-06	0	0.432413	g__TM7_phylum_sp__oral_clone_HD027	0.808678
1.62986e-06	0	7.16382e-06	0	0.264736	g__Treponema_2	0.754779
0	0	0	0		g__Trueperella
0	0	0	0		g__Tumebacillus
0.00276099	0.000528076	0.00222078	0.000352051	0.403323	g__Turicibacter	0.808678
0.000534596	0	0.000746061	0	0.332519	g__Tyzzerella	0.800434
0.000334122	0	0.000202634	0	0.160751	g__Tyzzerella_3	0.696385
0.000801893	0	0.00112165	0	0.524324	g__Tyzzerella_4	0.862208
0.00101867	0.000528076	0.00103364	0.000528076	0.114165	g__UBA1819	0.696385
0.000138538	0	7.77786e-05	0	0.2198	g__UC5_1_2E3	0.719056
1.62986e-06	0	1.0234e-06	0	0.743337	g__un_c__Alphaproteobacteria	0.901578
0.000166246	0	0.000229242	0	0.0794777	g__un_c__Clostridia	0.696385
4.88959e-06	0	0	0	0.209609	g__un_c__Gammaproteobacteria	0.696385
0	0	1.0234e-06	0	0.432413	g__un_f__A0839	0.808678
3.25973e-06	0	1.0234e-06	0	0.739411	g__un_f__Actinomycetaceae	0.901578
0.000161357	0	7.8802e-05	0	0.506822	g__un_f__Atopobiaceae	0.856973
7.00842e-05	0	7.26616e-05	0	0.357817	g__un_f__Barnesiellaceae	0.808678
0	0	0	0		g__un_f__Burkholderiaceae
0.000519927	0.000176025	0.000302927	0	0.550352	g__un_f__Christensenellaceae	0.87103
0	0	1.0234e-06	0	0.432413	g__un_f__Clostridiaceae_1	0.808678
7.33439e-05	0	0.000159651	0	0.283214	g__un_f__Clostridiales_vadinBB60_group	0.76829
0.000797004	0	0.000964046	0.000176025	0.451958	g__un_f__Coriobacteriales_Incertae_Sedis	0.821087
9.77919e-05	0	6.95914e-05	0	0.690062	g__un_f__Desulfovibrionaceae	0.901578
0.00111157	0.000352051	0.0012199	0.000176025	0.530458	g__un_f__Eggerthellaceae	0.863336
0	0	0	0		g__un_f__Enterobacteriaceae
0.000146688	0	9.21063e-05	0	0.153532	g__un_f__Erysipelotrichaceae	0.696385
0	0	0	0		g__un_f__Family_XI
2.93376e-05	0	1.94447e-05	0	0.28095	g__un_f__Family_XIII	0.76829
0	0	0	0		g__un_f__Family_XIV
1.62986e-06	0	0	0	0.209609	g__un_f__Family_XVIII	0.696385
0.000141798	0	0.000100294	0	0.637472	g__un_f__Flavobacteriaceae	0.884628
0.0082683	0.00580884	0.0104991	0.0062489	0.289128	g__un_f__Lachnospiraceae	0.76829
1.46688e-05	0	0	0	0.209609	g__un_f__Methanomethylophilaceae	0.696385
1.62986e-06	0	0	0	0.209609	g__un_f__Microbacteriaceae	0.696385
0	0	0	0		g__un_f__Micrococcaceae
2.4448e-05	0	6.14042e-06	0	0.0082849	g__un_f__Mitochondria	0.533115
0.0036346	0.000176025	0.00468616	0.000352051	0.71755	g__un_f__Muribaculaceae	0.901578
0	0	0	0		g__un_f__Neisseriaceae
0	0	0	0		g__un_f__Paludibacteraceae
6.51946e-05	0	0.000156581	0	0.477577	g__un_f__Pasteurellaceae	0.849496
0.000264038	0	0.000303951	0	0.105686	g__un_f__Peptococcaceae	0.696385
8.14932e-06	0	2.04681e-06	0	0.0714463	g__un_f__Peptostreptococcaceae	0.696385
0.000339012	0	0.000287576	0	0.499611	g__un_f__Prevotellaceae	0.856973
6.51946e-06	0	4.09361e-06	0	0.31422	g__un_f__Puniceicoccaceae	0.776598
0	0	1.0234e-06	0	0.432413	g__un_f__Rikenellaceae	0.808678
0.00427513	0.00176025	0.00576381	0.00228833	0.224023	g__un_f__Ruminococcaceae	0.719056
1.14091e-05	0	3.07021e-06	0	0.0781038	g__un_f__Saccharimonadaceae	0.696385
0	0	0	0		g__un_f__Steroidobacteraceae
6.51946e-06	0	1.0234e-06	0	0.739411	g__un_f__vadinBE97	0.901578
9.12724e-05	0	0.00068261	0	0.432502	g__un_f__Veillonellaceae	0.808678
1.95584e-05	0	0	0	0.028567	g__un_f__Victivallaceae	0.696385
0	0	2.04681e-06	0	0.432413	g__un_f__Weeksellaceae	0.808678
3.25973e-06	0	4.09361e-06	0	0.58262	g__un_k__Bacteria	0.880644
0.000306414	0	0.000122808	0	0.830642	g__un_o__Bacteroidales	0.938684
0	0	1.22808e-05	0	0.432413	g__un_o__Betaproteobacteriales	0.808678
0.000523186	0	2.04681e-06	0	0.634218	g__un_o__Chloroplast	0.884628
0.00024122	0	0.000355121	0	0.69384	g__un_o__Clostridiales	0.901578
0.000187434	0	0.000128949	0	0.0904905	g__un_o__Coriobacteriales	0.696385
0	0	0	0		g__un_o__Gammaproteobacteria_Incertae_Sedis
7.66036e-05	0	0.000404244	0	0.311236	g__un_o__Gastranaerophilales	0.776598
7.82335e-05	0	0.00019854	0	0.410732	g__un_o__Izimaplasmatales	0.808678
0.00185642	0	0.0024531	0	0.874632	g__un_o__Mollicutes_RF39	0.940113
0	0	0	0		g__un_o__NB1_j
4.88959e-06	0	3.47957e-05	0	0.303164	g__un_o__Rhodospirillales	0.776598
0	0	1.0234e-06	0	0.432413	g__un_p__Firmicutes	0.808678
0	0	0	0		g__un_p__LCP_89
1.46688e-05	0	6.14042e-06	0	0.636852	g__unidentified	0.884628
0	0	0	0		g__Vagococcus
6.51946e-06	0	2.04681e-05	0	0.222797	g__Varibaculum	0.719056
0.00188738	0.000528076	0.00294331	0.000352051	0.429785	g__Veillonella	0.808678
8.14932e-06	0	1.0234e-06	0	0.739411	g__Verrucomicrobium	0.901578
7.66036e-05	0	4.09361e-06	0	0.944669	g__Vicia_faba__fava_bean_	0.972237
1.62986e-06	0	5.11702e-06	0	0.848285	g__Victivallis	0.938684
1.62986e-06	0	0	0	0.209609	g__W5053	0.696385
0	0	9.00595e-05	0	0.0505297	g__wallaby_gut_metagenome	0.696385
2.11882e-05	0	1.0234e-05	0	0.501273	g__Weissella	0.856973
8.14932e-06	0	0	0	0.209609	g__Wolinella	0.696385
0	0	0	0		g__XBB1006
0	0	0	0		g__Z20

## Sheet: Hale_17AdvadnGenusWilcoxTest
Supplementary Table4: The Wilcoxon test results of the relative abundance of genera for the advance adenoma versus the normal within the each study.
Adv_Adenoma_mean	Adv_Adenoma_median	Normal_mean	Normal_median	pvalue	measures	FDR
0.000216316	0	0.000449627	0	0.0208778	g__Bacteroides_pectinophilus_group	0.646421
0.0138934	0.00798403	0.0129867	0.00798403	0.574816	g__Eubacterium_coprostanoligenes_group	0.900291
0.00804794	0.00399202	0.00898834	0.00499002	0.213797	g__Eubacterium_eligens_group	0.71751
3.44139e-05	0	5.88297e-05	0	0.356051	g__Eubacterium_fissicatena_group	0.809818
0.000117991	0	0.000115558	0	0.498492	g__Eubacterium_hallii_group	0.891492
0.0027187	0	0.00324194	0	0.981632	g__Eubacterium_ruminantium_group	0.998364
0.00125857	0	0.00131106	0.000998004	0.165249	g__Eubacterium_ventriosum_group	0.71751
0.00255646	0.000998004	0.00340162	0.00199601	0.00750579	g__Eubacterium_xylanophilum_group	0.646421
0.0039871	0.00299401	0.00400252	0.00199601	0.894743	g__Ruminococcus_gauvreauii_group	0.970356
0.00187802	0	0.00289106	0	0.654536	g__Ruminococcus_gnavus_group	0.924757
0.0102259	0.00798403	0.00982666	0.00598802	0.106355	g__Ruminococcus_torques_group	0.646421
0.000516209	0	0.000651329	0	0.768047	g__Achromobacter	0.963709
0.000653865	0	0.00047484	0	0.171585	g__Acidaminococcus	0.71751
0.02114	0.0159681	0.0220969	0.0159681	0.83293	g__Agathobacter	0.969829
0.000299893	0	0.000271037	0	0.513191	g__Akkermansia	0.891492
0.039517	0.0329341	0.042286	0.0309381	0.627127	g__Alistipes	0.903042
0.00198618	0	0.00224393	0	0.650606	g__Alloprevotella	0.924757
1.47488e-05	0	2.73138e-05	0	0.479859	g__Anaerofustis	0.891492
9.83255e-05	0	0.000764786	0	0.511249	g__Anaeroplasma	0.891492
0.0101669	0.00598802	0.0106146	0.00798403	0.134321	g__Anaerostipes	0.646421
0.000201567	0	0.000252127	0	0.818638	g__Anaerotruncus	0.969829
1.96651e-05	0	6.09308e-05	0	0.257711	g__Bacteroidales_bacterium_55_9	0.781453
0.353402	0.346307	0.325421	0.319361	0.0554145	g__Bacteroides	0.646421
0.00911478	0	0.0112197	0.000998004	0.0479339	g__Barnesiella	0.646421
2.45814e-05	0	4.20212e-05	0	0.800948	g__Bifidobacterium	0.969829
0.0351317	0.0309381	0.0378317	0.0299401	0.880698	g__Blautia	0.969829
0.000929176	0	0.00112197	0.000998004	0.0979525	g__Butyricicoccus	0.646421
0.00154863	0	0.00137199	0	0.853595	g__Butyricimonas	0.969829
0.005285	0	0.00643765	0	0.354114	g__Butyrivibrio	0.809818
0.00108158	0	0.00180271	0	0.0458757	g__CAG_352	0.646421
0.00046213	0	0.000226915	0	0.338707	g__CAG_873	0.809818
0	0	6.7234e-05	0	0.51536	g__Campylobacter	0.891492
0.00121924	0	0.000117659	0	0.0212799	g__Candidatus_Soleaferrea	0.646421
0.000314642	0	0.000392898	0	0.858632	g__Candidatus_Stoquefichus	0.969829
8.35767e-05	0	0.000102952	0	0.292168	g__Caproiciproducens	0.809818
0.00121924	0	0.00105473	0	0.234311	g__Catenibacterium	0.736405
0	0	2.52127e-05	0	0.190617	g__Cenchrus_americanus	0.71751
0.00744324	0.00299401	0.0109612	0.00399202	0.04516	g__Christensenellaceae_R_7_group	0.646421
6.88279e-05	0	2.52127e-05	0	0.287861	g__Cloacibacillus	0.809818
0.000545707	0	0.000817313	0	0.284623	g__Clostridiales_bacterium_enrichment_culture_clone_06_1235251_67	0.809818
0.0016912	0	0.00265154	0	0.0767446	g__Clostridium_sensu_stricto_1	0.646421
0.000368721	0	0.000292047	0	0.202758	g__Clostridium_sp__K4410_MGS_306	0.71751
0.00266954	0.000998004	0.00271247	0.000998004	0.697103	g__Collinsella	0.925465
0.00137656	0	0.0009896	0	0.604263	g__Coprobacter	0.903042
0.000914427	0	0.000905557	0	0.55299	g__Coprococcus_1	0.900291
0.00244339	0	0.00309696	0	0.458087	g__Coprococcus_2	0.870932
0.00373637	0.00299401	0.00311167	0.00199601	0.126198	g__Coprococcus_3	0.646421
4.91628e-06	0	5.88297e-05	0	0.0359828	g__Cuneatibacter	0.646421
3.44139e-05	0	4.41223e-05	0	0.77578	g__Defluviitaleaceae_UCG_011	0.963709
0.000801353	0	0.000668137	0	0.88796	g__Dialister	0.969829
0.00538332	0.00399202	0.0047484	0.00299401	0.0826713	g__Dorea	0.646421
0.000255646	0	0.00035718	0	0.190793	g__DTU089	0.71751
0.000231065	0	0.000331968	0	0.934114	g__Eggerthella	0.987655
0.000693195	0	0.00061351	0	0.329367	g__Eisenbergiella	0.809818
0	0	0.000306755	0	0.356047	g__Elusimicrobium	0.809818
2.45814e-05	0	0.000819414	0	0.390963	g__Enterococcus	0.813626
0.000865265	0	0.00110516	0	0.623864	g__Erysipelatoclostridium	0.903042
0.00430174	0.000998004	0.00509717	0.00199601	0.676351	g__Erysipelotrichaceae_UCG_003	0.925465
0.00176986	0	0.00152327	0	0.872449	g__Escherichia_Shigella	0.969829
0.0978388	0.0978044	0.105335	0.100798	0.117267	g__Faecalibacterium	0.646421
0.00050146	0	0.000628217	0	0.457164	g__Faecalitalea	0.870932
0.000599786	0	0.000724866	0	0.777402	g__Family_XIII_AD3011_group	0.963709
0.000137656	0	9.66488e-05	0	0.22532	g__Family_XIII_UCG_001	0.727747
9.83255e-06	0	0.000441223	0	0.0104081	g__Firmicutes_bacterium_CAG_345	0.646421
0.000909511	0	0.000928669	0	0.331814	g__Fournierella	0.809818
0.00977356	0.00798403	0.0101292	0.00798403	0.675851	g__Fusicatenibacter	0.925465
0.00237456	0	0.0019834	0	0.322287	g__Fusobacterium	0.809818
0.00032939	0	0.000531568	0	0.131218	g__GCA_900066225	0.646421
0.000491628	0	0.000626116	0	0.0985243	g__GCA_900066575	0.646421
3.44139e-05	0	5.67286e-05	0	0.356051	g__GCA_900066755	0.809818
0.0067353	0	0.00655321	0	0.2039	g__gut_metagenome	0.71751
0.00206484	0	0.00164723	0	0.258793	g__Holdemanella	0.781453
0.000206484	0	0.000163883	0	0.762786	g__Howardella	0.963709
8.35767e-05	0	9.24467e-05	0	0.144869	g__Hydrogenoanaerobacterium	0.65617
0.00115532	0	0.00121651	0	0.597238	g__Intestinibacter	0.903042
0.000255646	0	0.000323563	0	0.697099	g__Intestinimonas	0.925465
0.000314642	0	0.000338271	0	0.595872	g__Klebsiella	0.903042
0.0116516	0.00698603	0.0104696	0.00598802	0.182761	g__Lachnoclostridium	0.71751
0.00925735	0.00499002	0.00920685	0.00698603	0.88414	g__Lachnospira	0.969829
0.00029006	0	0.000502154	0	0.88483	g__Lachnospiraceae_AC2044_group	0.969829
0.000796437	0	0.000861435	0	0.996313	g__Lachnospiraceae_FCS020_group	0.998364
0.00544232	0.00399202	0.00569808	0.00399202	0.98624	g__Lachnospiraceae_ND3007_group	0.998364
0.0155551	0.010978	0.015115	0.00998004	0.669034	g__Lachnospiraceae_NK4A136_group	0.925465
0.000162237	0	0.000195399	0	0.382052	g__Lachnospiraceae_NK4B4_group	0.810064
0.000693195	0	0.000985398	0	0.0803809	g__Lachnospiraceae_UCG_001	0.646421
0.00184852	0.000998004	0.00172287	0.000998004	0.382425	g__Lachnospiraceae_UCG_004	0.810064
0.00137164	0	0.00111146	0	0.121498	g__Lachnospiraceae_UCG_010	0.646421
9.34092e-05	0	0.00102532	0	0.998364	g__Lactobacillus	0.998364
0.000609618	0	0.000726967	0	0.417874	g__Marvinbryantia	0.848918
0.000108158	0	0.000161782	0	0.12589	g__Megasphaera	0.646421
4.91628e-06	0	3.15159e-05	0	0.0600228	g__Merdibacter	0.646421
0.00106192	0	0.0015863	0	0.375128	g__metagenome	0.810064
8.35767e-05	0	3.99202e-05	0	0.0951289	g__Mogibacterium	0.646421
0.00096359	0	0.000943376	0	0.565722	g__Negativibacillus	0.900291
0.00913444	0.00499002	0.00879504	0.00499002	0.931846	g__Odoribacter	0.987655
0.00466063	0.00299401	0.00424624	0.00199601	0.207232	g__Oscillibacter	0.71751
0.000393302	0	0.000361382	0	0.32807	g__Oscillospira	0.809818
0.0293354	0.0219561	0.028171	0.0229541	0.78938	g__Parabacteroides	0.964798
0.00266954	0	0.00269566	0	0.532453	g__Paraprevotella	0.891492
0.00337748	0	0.00230697	0	0.357582	g__Parasutterella	0.809818
0.00250238	0	0.00216409	0	0.782231	g__Phascolarctobacterium	0.963709
0.000108158	0	0.000107154	0	0.988538	g__Phocea	0.998364
0.000914427	0	0.0011934	0	0.202019	g__Prevotella_2	0.71751
0.00153388	0	0.00133417	0	0.875648	g__Prevotella_7	0.969829
0.0395121	0	0.0299506	0	0.445156	g__Prevotella_9	0.870932
0	0	0.000136569	0	0.51536	g__Prevotellaceae_Ga6A1_group	0.891492
0.000368721	0	0.000266835	0	0.0381602	g__Prevotellaceae_NK3B31_group	0.646421
4.91628e-06	0	0.000107154	0	0.538368	g__Rikenella	0.891492
0.00200092	0	0.00243933	0	0.122093	g__Rikenellaceae_RC9_gut_group	0.646421
0.000939009	0	0.00128375	0	0.182566	g__Romboutsia	0.71751
0.018028	0.0149701	0.0178233	0.0139721	0.746898	g__Roseburia	0.963709
5.4079e-05	0	4.41223e-05	0	0.418946	g__Ruminiclostridium	0.848918
6.39116e-05	0	9.24467e-05	0	0.68054	g__Ruminiclostridium_1	0.925465
0.00582579	0.00399202	0.00592919	0.00399202	0.689094	g__Ruminiclostridium_5	0.925465
0.00939992	0.000998004	0.0105978	0.00199601	0.0323688	g__Ruminiclostridium_6	0.646421
0.00268429	0.00199601	0.00225024	0.000998004	0.0699245	g__Ruminiclostridium_9	0.646421
0.00512276	0.00199601	0.00520223	0.00299401	0.431998	g__Ruminococcaceae_NK4A214_group	0.863995
0.0277081	0.0169661	0.0257254	0.0189621	0.866191	g__Ruminococcaceae_UCG_002	0.969829
0.00510309	0.00299401	0.00490178	0.00199601	0.22683	g__Ruminococcaceae_UCG_003	0.727747
0.000776772	0	0.000892951	0	0.578759	g__Ruminococcaceae_UCG_004	0.900291
0.00411492	0.000998004	0.00538292	0.00199601	0.0194617	g__Ruminococcaceae_UCG_005	0.646421
0.00186327	0	0.00228385	0	0.344775	g__Ruminococcaceae_UCG_010	0.809818
0.00220249	0.000998004	0.00229646	0.000998004	0.969162	g__Ruminococcaceae_UCG_013	0.998364
0.0104962	0.000998004	0.0135077	0.00299401	0.124748	g__Ruminococcaceae_UCG_014	0.646421
9.83255e-06	0	2.10106e-06	0	0.535363	g__Ruminococcaceae_V9D2013_group	0.891492
0.0122169	0.00499002	0.0129425	0.00798403	0.0760171	g__Ruminococcus_1	0.646421
0.0116319	0.00698603	0.0163778	0.00898204	0.0953657	g__Ruminococcus_2	0.646421
8.35767e-05	0	0.000142872	0	0.497916	g__Sellimonas	0.891492
0.000216316	0	0.000182792	0	0.610558	g__Streptococcus	0.903042
0.0258842	0.0209581	0.0289526	0.0209581	0.330019	g__Subdoligranulum	0.809818
0.000196651	0	0.000329867	0	0.627438	g__Succinivibrio	0.903042
0.00482778	0	0.00390587	0	0.319086	g__Sutterella	0.809818
2.45814e-05	0	6.30318e-05	0	0.830056	g__Synergistes	0.969829
0.000157321	0	0.00029625	0	0.275644	g__Turicibacter	0.809818
0.00111108	0	0.00122072	0	0.84876	g__Tyzzerella	0.969829
0.000157321	0	0.000201702	0	0.704594	g__Tyzzerella_3	0.927415
0.000727609	0	0.000907658	0	0.562485	g__UBA1819	0.900291
0	0	2.31117e-05	0	0.51536	g__un_c__Alphaproteobacteria	0.891492
0.000521125	0	0.000720664	0	0.214321	g__un_f__Barnesiellaceae	0.71751
0.000265479	0	0.000256329	0	0.959766	g__un_f__Christensenellaceae	0.998364
0.000216316	0	0.000468537	0	0.451766	g__un_f__Clostridiales_vadinBB60_group	0.870932
0.000265479	0	0.000289946	0	0.608636	g__un_f__Coriobacteriales_Incertae_Sedis	0.903042
0.000378553	0	0.000329867	0	0.936348	g__un_f__Eggerthellaceae	0.987655
0.000319558	0	0.000449627	0	0.576404	g__un_f__Flavobacteriaceae	0.900291
0.00331357	0.00199601	0.00299611	0.00199601	0.0892844	g__un_f__Lachnospiraceae	0.646421
0.000693195	0	0.00124593	0	0.917452	g__un_f__Muribaculaceae	0.987655
0.000231065	0	0.000199601	0	0.995092	g__un_f__Prevotellaceae	0.998364
0.00507851	0.00299401	0.00506986	0.00299401	0.743069	g__un_f__Ruminococcaceae	0.963709
1.47488e-05	0	0.000142872	0	0.538368	g__un_o__Chloroplast	0.891492
4.91628e-05	0	4.83244e-05	0	0.880048	g__un_o__Coriobacteriales	0.969829
5.4079e-05	0	1.26064e-05	0	0.141049	g__un_o__Gastranaerophilales	0.65617
0.00067353	0	0.00123963	0	0.760622	g__un_o__Izimaplasmatales	0.963709
0.000786604	0	0.000787898	0	0.383991	g__un_o__Mollicutes_RF39	0.810064
0.000196651	0	1.26064e-05	0	0.377386	g__un_o__Rhodospirillales	0.810064

## Sheet: Mori_18AdvadnGenusWilcoxTest
Supplementary Table4: The Wilcoxon test results of the relative abundance of genera for the advance adenoma versus the normal within the each study.
Adv_Adenoma_mean	Adv_Adenoma_median	Normal_mean	Normal_median	pvalue	measures	FDR
0.000108505	0	0	0	0.381908	g__Bacteroides_pectinophilus_group	0.710295
0.000137439	7.59532e-05	5.48551e-05	0	0.0908922	g__Clostridium_innocuum_group	0.710295
0.000209776	7.59532e-05	0.000130808	0	0.434902	g__Eubacterium_brachy_group	0.767737
0.0159574	0.0095701	0.0391539	0.014583	0.602206	g__Eubacterium_coprostanoligenes_group	0.895426
0.00046657	0.000151906	0.00198744	0.000379766	0.172201	g__Eubacterium_eligens_group	0.710295
2.17009e-05	0	1.68785e-05	0	0.236233	g__Eubacterium_fissicatena_group	0.710295
0.0241387	0.017849	0.0147898	0.0153046	0.158935	g__Eubacterium_hallii_group	0.710295
9.40373e-05	0	4.64159e-05	0	0.523534	g__Eubacterium_nodatum_group	0.816943
3.61682e-06	0	0	0	0.381908	g__Eubacterium_oxidoreducens_group	0.710295
0.000593158	0	0.00111398	0	0.669528	g__Eubacterium_ruminantium_group	0.933672
0	0	0	0		g__Eubacterium_saphenum_group
0.00243774	0.0024305	0.00241784	0.00110132	0.671474	g__Eubacterium_ventriosum_group	0.933672
0.000672728	0.000303813	0.000586528	0.000151906	0.57488	g__Eubacterium_xylanophilum_group	0.868435
0.00118632	0.00022786	0.000751093	0.00022786	0.481555	g__Ruminococcus_gauvreauii_group	0.80094
0.00575074	0.000151906	0.00135872	3.79766e-05	0.316923	g__Ruminococcus_gnavus_group	0.710295
0.0161997	0.00972201	0.00887387	0.00596233	0.105241	g__Ruminococcus_torques_group	0.710295
1.08505e-05	0	4.21962e-06	0	0.391171	g__Abiotrophia	0.716726
1.44673e-05	0	1.26589e-05	0	0.865421	g__Acetanaerobacterium	0.990041
1.44673e-05	0	0	0	0.197042	g__Acetitomaculum	0.710295
0.000564224	0	0.00164143	0	0.735929	g__Acidaminococcus	0.972426
2.17009e-05	0	8.43925e-06	0	0.485702	g__Acinetobacter	0.80094
0.000191691	7.59532e-05	9.28317e-05	7.59532e-05	0.631988	g__Actinomyces	0.920434
5.78691e-05	0	0.000679359	0.00011393	0.0891061	g__Adlercreutzia	0.710295
0	0	0	0		g__Aerococcus
0	0	0	0		g__Aeromonas
0.0385661	0.0132918	0.0619778	0.0320902	0.735291	g__Agathobacter	0.972426
2.17009e-05	0	8.43925e-06	0	0.715942	g__Aggregatibacter	0.968226
0.0106443	0.000379766	0.0329131	0.000683579	0.953089	g__Akkermansia	0.992642
0.0376005	0.0240012	0.0359259	0.0300395	0.748746	g__Alistipes	0.972426
6.14859e-05	0	5.90747e-05	0	0.631721	g__Allisonella	0.920434
0	0	0	0		g__Allobaculum
7.23364e-06	0	0.0017427	0	0.0198812	g__Alloprevotella	0.627363
0	0	0	0		g__Allorhizobium_Neorhizobium_Pararhizobium_Rhizobium
1.44673e-05	0	0	0	0.197042	g__Alloscardovia	0.710295
1.80841e-05	0	2.10981e-05	0	0.857385	g__Anaerococcus	0.990041
0	0	4.21962e-06	0	0.303626	g__Anaerocolumna	0.710295
2.53177e-05	0	3.79766e-05	0	0.555456	g__Anaerofilum	0.8527
2.89346e-05	0	1.68785e-05	0	0.342907	g__Anaerofustis	0.710295
0	0	0	0		g__Anaeroglobus
7.23364e-06	0	0	0	0.381908	g__Anaeroplasma	0.710295
0.0160406	0.00972201	0.00674718	0.0058484	0.0992909	g__Anaerostipes	0.710295
7.957e-05	0	0.000354448	0.00011393	0.0544445	g__Anaerotruncus	0.710295
0	0	0	0		g__Angelakisella
0	0	4.21962e-06	0	0.303626	g__Aquabacterium	0.710295
7.23364e-06	0	8.43925e-06	0	0.941237	g__Asteroleplasma	0.990041
2.53177e-05	0	1.68785e-05	0	0.43161	g__Atopobium	0.767737
0	0	4.21962e-06	0	0.303626	g__Atopococcus	0.710295
4.34018e-05	0	0.000270056	0	0.437934	g__Azospirillum_sp__47_25	0.767737
0	0	0	0		g__Bacillus
0	0	0	0		g__Bacteroidales_bacterium_55_9
0.188501	0.194136	0.264275	0.205909	0.394469	g__Bacteroides	0.718136
0.00735661	0.0022786	0.00334194	0.000873462	0.806293	g__Barnesiella	0.989463
0	0	0	0		g__Bergeyella
0.01599	0.00653198	0.0190052	0.0104815	0.910183	g__Bifidobacterium	0.990041
0.000748682	0.000303813	0.00324489	0.000683579	0.112244	g__Bilophila	0.710295
0.11844	0.0972201	0.0790293	0.0395336	0.0126551	g__Blautia	0.567277
0	0	0	0		g__Bosea
0	0	0	0		g__Brachybacterium
1.08505e-05	0	0	0	0.197197	g__Bradyrhizobium	0.710295
0	0	0	0		g__Brevundimonas
0	0	0	0		g__Brochothrix
0	0	0	0		g__Bulleidia
0	0	0	0		g__Burkholderia_Caballeronia_Paraburkholderia
0.00502376	0.00258241	0.00320691	0.00235455	0.284308	g__Butyricicoccus	0.710295
0.00221349	0.000683579	0.000683579	0.000189883	0.112344	g__Butyricimonas	0.710295
0.000119355	0	0	0	0.381908	g__Butyrivibrio	0.710295
0.000542523	0	0.000308032	0	0.978661	g__CAG_352	0.992642
0.00213754	0.000835485	0.00122369	0.000379766	0.468649	g__CAG_56	0.792239
0	0	0	0		g__CAG_873
7.23364e-06	0	0	0	0.381908	g__Campylobacter	0.710295
0	0	0	0		g__Candidatus_Melainabacteria_bacterium_MEL_A1
0	0	0	0		g__Candidatus_Methanogranum
0	0	0	0		g__Candidatus_Methanomethylophilus
3.61682e-05	0	8.01728e-05	7.59532e-05	0.151546	g__Candidatus_Soleaferrea	0.710295
4.34018e-05	0	0	0	0.381908	g__Candidatus_Stoquefichus	0.710295
2.89346e-05	0	8.43925e-05	3.79766e-05	0.0292366	g__Caproiciproducens	0.691933
5.06355e-05	0	2.95374e-05	0	0.665237	g__Carnobacterium	0.933672
1.08505e-05	0	2.10981e-05	0	0.31409	g__Catabacter	0.710295
0.000665495	0	0.00123213	0	0.261178	g__Catenibacterium	0.710295
0	0	0.000236299	0	0.130878	g__Catenisphaera	0.710295
7.23364e-06	0	4.21962e-06	0	0.669283	g__Caulobacter	0.933672
0	0	0	0		g__Cellulosilyticum
3.9785e-05	0	0.00010971	0	0.566336	g__Cercis_gigantea	0.860105
3.61682e-06	0	0	0	0.381908	g__CHKCI001	0.710295
1.08505e-05	0	2.10981e-05	0	0.71454	g__CHKCI002	0.968226
0.00781956	0.00478505	0.00516904	0.00288622	0.184006	g__Christensenellaceae_R_7_group	0.710295
0	0	0	0		g__Chryseobacterium
0	0	8.43925e-06	0	0.303626	g__Cloacibacillus	0.710295
1.08505e-05	0	8.43925e-06	0	0.970609	g__Clostridiales_bacterium_enrichment_culture_clone_06_1235251_67	0.992642
0.00398212	0.000987392	0.000607626	0.000455719	0.216212	g__Clostridium_sensu_stricto_1	0.710295
0	0	0	0		g__Clostridium_sp__CAG_306
6.87196e-05	0	3.3757e-05	0	0.278064	g__Clostridium_sp__K4410_MGS_306	0.710295
0.00282474	0.00167097	0.000848144	0.000569649	0.101085	g__Collinsella	0.710295
0.000271261	0	0.000147687	0	0.319218	g__Coprobacter	0.710295
0.00217371	0.00205074	0.000848144	0.000531672	0.0560546	g__Coprococcus_1	0.710295
0.0071396	0	0.0207183	0.000721556	0.200715	g__Coprococcus_2	0.710295
0.0120295	0.00888653	0.00566273	0.00391159	0.0481627	g__Coprococcus_3	0.710295
7.23364e-06	0	8.43925e-06	0	0.522015	g__Coriobacteriaceae_UCG_002	0.816943
0	0	0	0		g__Coriobacteriaceae_UCG_003
2.17009e-05	0	4.21962e-06	0	0.207069	g__Corynebacterium	0.710295
0	0	1.68785e-05	0	0.0587261	g__Corynebacterium_1	0.710295
0	0	0	0		g__Curvibacter
8.68037e-05	0	5.06355e-05	0	0.406767	g__Defluviitaleaceae_UCG_011	0.731151
0	0	0	0		g__Deinococcus
0	0	0	0		g__Denitrobacterium
0.000835485	0	0.000417743	0	0.594469	g__Desulfovibrio	0.888574
0.00252816	7.59532e-05	0.0062788	0.0011393	0.791163	g__Dialister	0.986648
5.06355e-05	0	0	0	0.0163334	g__Dielma	0.579837
1.80841e-05	0	1.68785e-05	0	0.875071	g__DNF00809	0.990041
7.23364e-06	0	0	0	0.381908	g__Dolosigranulum	0.710295
0.0178816	0.0169376	0.0110934	0.00812699	0.212593	g__Dorea	0.710295
0.000300196	7.59532e-05	0.000459939	0.00011393	0.826058	g__DTU089	0.990041
0	0	0	0		g__Dyella
6.14859e-05	0	0.000173005	3.79766e-05	0.147133	g__Eggerthella	0.710295
0	0	1.26589e-05	0	0.0585464	g__Eikenella	0.710295
0.000264028	0	0.000168785	0	0.849447	g__Eisenbergiella	0.990041
0	0	0	0		g__Elusimicrobium
0	0	8.43925e-06	0	0.130745	g__Enhydrobacter	0.710295
0	0	0	0		g__Enorma
0.000842719	0	0.000198322	0	0.792098	g__Enterococcus	0.986648
0.000253177	0	0.000160346	0	0.133747	g__Enterorhabdus	0.710295
2.17009e-05	0	0	0	0.197197	g__Epulopiscium	0.710295
0.00323705	0.000379766	0.000346009	7.59532e-05	0.111558	g__Erysipelatoclostridium	0.710295
0	0	8.43925e-06	0	0.303626	g__Erysipelotrichaceae_UCG_002	0.710295
0.0142394	0.00675984	0.00320691	0.000987392	0.0633599	g__Erysipelotrichaceae_UCG_003	0.710295
0	0	0	0		g__Erysipelotrichaceae_UCG_004
0.0202361	0.00144311	0.00863335	0.000721556	0.681983	g__Escherichia_Shigella	0.935668
1.80841e-05	0	0	0	0.381908	g__Eubacterium	0.710295
3.9785e-05	0	8.43925e-06	0	0.752265	g__Ezakiella	0.972426
7.23364e-06	0	0	0	0.197042	g__F0332	0.710295
0.0632582	0.0548382	0.0473315	0.0377867	0.185456	g__Faecalibacterium	0.710295
0.000195308	0	0	0	0.381908	g__Faecalicoccus	0.710295
0.000810168	0	8.86121e-05	0	0.760136	g__Faecalitalea	0.972426
0.000726981	0.000531672	0.000578088	0.000303813	0.25191	g__Family_XIII_AD3011_group	0.710295
0.000448486	0.00022786	0.000316472	0.000303813	1	g__Family_XIII_UCG_001	1
0	0	0	0		g__Fastidiosipila
0	0	0	0		g__Filifactor
1.80841e-05	0	1.26589e-05	0	0.544182	g__Finegoldia	0.839933
0	0	0	0		g__Firmicutes_bacterium_CAG_345
0	0	0	0		g__Flavobacterium
0.00087527	7.59532e-05	0.00122369	0.000607626	0.222821	g__Flavonifractor	0.710295
0.00023871	7.59532e-05	0.000215201	7.59532e-05	0.758082	g__Fournierella	0.972426
0	0	0	0		g__Fretibacterium
0	0	0	0		g__Fructobacillus
0.0102537	0.00425338	0.00928739	0.00383564	0.966288	g__Fusicatenibacter	0.992642
0.0016782	0	0.000489476	0	0.326001	g__Fusobacterium	0.710295
0	0	0	0		g__Gardnerella
0.000151906	7.59532e-05	0.000156126	0.00011393	0.668481	g__GCA_900066225	0.933672
0.000734214	0.000151906	0.000135028	7.59532e-05	0.162706	g__GCA_900066575	0.710295
0	0	0	0		g__GCA_900066755
0.000101271	0	5.06355e-05	0	0.259284	g__Gemella	0.710295
4.70187e-05	0	2.53177e-05	0	0.3896	g__Gordonibacter	0.716726
7.23364e-06	0	4.21962e-06	0	0.970609	g__Granulicatella	0.992642
0.000444869	7.59532e-05	0.00132918	0	0.796721	g__gut_metagenome	0.988073
0.000260411	0	0.000181444	0	0.888865	g__Haemophilus	0.990041
3.61682e-06	0	0	0	0.381908	g__Hafnia_Obesumbacterium	0.710295
3.61682e-06	0	0	0	0.381908	g__Halomonas	0.710295
0	0	0	0		g__Harryflintia
0	0	0	0		g__hgcI_clade
0.00539268	0	0.00198744	0	0.374925	g__Holdemanella	0.710295
9.76541e-05	0	1.68785e-05	0	0.0426738	g__Holdemania	0.710295
0.000133822	0	0.00010971	0	0.932889	g__Howardella	0.990041
0.000166374	0	0.000324911	7.59532e-05	0.274971	g__Hungatella	0.710295
7.23364e-06	0	0.000350229	0	0.12875	g__Hydrogenoanaerobacterium	0.710295
0	0	0	0		g__Hymenobacter
0	0	0	0		g__Hyphomicrobium
0.00185181	0.000303813	0.00287356	0.00022786	0.831413	g__Intestinibacter	0.990041
0.000104888	0	9.70513e-05	0	0.849418	g__Intestinimonas	0.990041
0	0	0	0		g__Johnsonella
0.0162685	0	0.00117306	0	0.818887	g__Klebsiella	0.990041
3.61682e-06	0	0	0	0.381908	g__Kocuria	0.710295
0	0	0	0		g__Lachnoanaerobaculum
0.00457528	0.00273432	0.0040213	0.00159502	0.330891	g__Lachnoclostridium	0.710295
0.000575074	0.00022786	0.00089456	0.000417743	0.819758	g__Lachnospira	0.990041
0	0	0	0		g__Lachnospiraceae_AC2044_group
0.000383383	0.000379766	0.000257397	0.00022786	0.32549	g__Lachnospiraceae_FCS020_group	0.710295
0.000766766	0.000151906	0.000881901	0.000189883	0.919854	g__Lachnospiraceae_ND3007_group	0.990041
0	0	0	0		g__Lachnospiraceae_NK3A20_group
0.00521184	0.00205074	0.00349385	0.000797509	0.154475	g__Lachnospiraceae_NK4A136_group	0.710295
0	0	8.43925e-06	0	0.303626	g__Lachnospiraceae_NK4B4_group	0.710295
0.00128759	0.000151906	0.00198322	0.000189883	0.954162	g__Lachnospiraceae_UCG_001	0.992642
4.70187e-05	0	0	0	0.106127	g__Lachnospiraceae_UCG_003	0.710295
0.00023871	0	0.000206762	7.59532e-05	0.380921	g__Lachnospiraceae_UCG_004	0.710295
0.000122972	0	5.90747e-05	0	0.34908	g__Lachnospiraceae_UCG_008	0.710295
0.000777616	0.00022786	0.000362888	0.000189883	0.338481	g__Lachnospiraceae_UCG_010	0.710295
0.00931331	0.000151906	0.000379766	0	0.148602	g__Lactobacillus	0.710295
0.000137439	0	7.17336e-05	0	0.754716	g__Lactococcus	0.972426
0	0	0	0		g__Lactonifactor
3.61682e-06	0	0	0	0.381908	g__Lawsonella	0.710295
3.61682e-06	0	0	0	0.381908	g__Legionella	0.710295
7.23364e-06	0	0	0	0.197042	g__Leifsonia	0.710295
0	0	0	0		g__Leptotrichia
2.53177e-05	0	1.68785e-05	0	0.865967	g__Leuconostoc	0.990041
7.23364e-06	0	2.10981e-05	0	0.911985	g__Libanicoccus	0.990041
2.53177e-05	0	0	0	0.381908	g__Mailhella	0.710295
0.000799317	0.00022786	0.0004515	0.00022786	0.443555	g__Marvinbryantia	0.768806
0	0	0	0		g__Massilia
0.000249561	0	0	0	0.197197	g__Megamonas	0.710295
0	0	0.00142623	0	0.303626	g__Megasphaera	0.710295
8.31869e-05	0	2.10981e-05	0	0.7743	g__Merdibacter	0.981351
0.00054614	0	0.00056121	0	0.368459	g__metagenome	0.710295
0.00213392	0	0.00293264	0.000151906	0.035666	g__Methanobrevibacter	0.710295
4.70187e-05	0	0.000185663	0	0.126602	g__Methanosphaera	0.710295
7.23364e-06	0	2.95374e-05	0	0.120633	g__Methylobacterium	0.710295
3.61682e-06	0	0	0	0.381908	g__Micrococcus	0.710295
0	0	0.000151906	0	0.130878	g__Mitsuokella	0.710295
0	0	0	0		g__Mobiluncus
0.00014829	0	0.000320691	0	0.321453	g__Mogibacterium	0.710295
7.23364e-06	0	4.21962e-06	0	0.669283	g__Morganella	0.933672
9.40373e-05	0	5.90747e-05	0	0.745502	g__Moryella	0.972426
5.06355e-05	0	0	0	0.197197	g__Mucispirillum	0.710295
0	0	0	0		g__Murdochiella
0.000195308	7.59532e-05	0.000312252	0	0.499738	g__Negativibacillus	0.811003
0	0	0	0		g__Negativicoccus
0	0	8.43925e-06	0	0.130745	g__Neisseria	0.710295
0	0	0	0		g__Neochlamydia
7.23364e-06	0	0	0	0.197042	g__Nordella	0.710295
0	0	0	0		g__Nubsella
7.23364e-06	0	0	0	0.381908	g__Oceanivirga	0.710295
0.00155523	0.0011393	0.000476817	0.000379766	0.010485	g__Odoribacter	0.567277
0.000264028	0	3.79766e-05	0	0.730936	g__Olsenella	0.972426
2.17009e-05	0	0.00010971	0	0.908682	g__Oribacterium	0.990041
0.0012261	0.000683579	0.000729995	0.000341789	0.351026	g__Oscillibacter	0.710295
2.89346e-05	0	0.00021942	0	0.111969	g__Oscillospira	0.710295
3.61682e-06	0	5.06355e-05	0	0.446053	g__Oxalobacter	0.768806
3.61682e-06	0	8.43925e-06	0	0.911985	g__Paeniclostridium	0.990041
0	0	0	0		g__Papillibacter
0.00872739	0.00417743	0.0100469	0.00694972	0.209902	g__Parabacteroides	0.710295
3.25514e-05	0	0	0	0.0575067	g__Paracoccus	0.710295
0.00166735	0	0.00548973	0	0.382659	g__Paraprevotella	0.710295
0	0	0	0		g__Parascardovia
0.00126227	7.59532e-05	0.00141779	0	0.631647	g__Parasutterella	0.920434
4.34018e-05	0	2.95374e-05	0	0.246444	g__Parvimonas	0.710295
5.06355e-05	0	2.10981e-05	0	0.522114	g__Pediococcus	0.816943
9.04205e-05	0	2.10981e-05	0	0.180036	g__Pelomonas	0.710295
0	0	0	0		g__Peptoclostridium
0.00102718	0	0.000101271	0	0.904659	g__Peptococcus	0.990041
3.61682e-05	0	1.26589e-05	0	0.310288	g__Peptoniphilus	0.710295
3.61682e-06	0	4.21962e-06	0	0.941237	g__Peptostreptococcus	0.990041
0.00217009	0.000303813	0.00125323	0.000341789	0.677065	g__Phascolarctobacterium	0.933672
1.08505e-05	0	8.43925e-06	0	0.789089	g__Phocea	0.986648
0	0	0	0		g__Phreatobacter
3.25514e-05	0	0	0	0.0575067	g__Porphyromonas	0.710295
1.08505e-05	0	0.000126589	0	0.134808	g__Prevotella	0.710295
0	0	0.00146843	0	0.130878	g__Prevotella_2	0.710295
2.17009e-05	0	4.21962e-06	0	0.647444	g__Prevotella_6	0.928657
0	0	0	0		g__Prevotella_7
0.0195815	0	0.0465045	0	0.120714	g__Prevotella_9	0.710295
0.0118487	0	0.00275963	0	0.857429	g__Prevotellaceae_NK3B31_group	0.990041
0.000119355	0	0.000215201	0	0.911985	g__Prevotellaceae_UCG_001	0.990041
3.61682e-06	0	0	0	0.381908	g__Proteus	0.710295
3.61682e-06	0	1.68785e-05	0	0.911985	g__Pseudobutyrivibrio	0.990041
0.000274878	7.59532e-05	2.10981e-05	0	0.0431572	g__Pseudoflavonifractor	0.710295
1.08505e-05	0	0	0	0.105878	g__Pseudomonas	0.710295
2.17009e-05	0	2.10981e-05	0	0.89359	g__Pygmaiobacter	0.990041
0	0	0.00191571	0	0.0263868	g__Pyramidobacter	0.681258
0	0	0	0		g__Ralstonia
1.44673e-05	0	4.21962e-06	0	0.377062	g__Raoultibacter	0.710295
0	0	0	0		g__Rikenella
3.61682e-06	0	0.00121525	0	0.208701	g__Rikenellaceae_RC9_gut_group	0.710295
0.00236178	0.000683579	0.0011393	0.000417743	0.777479	g__Romboutsia	0.981351
0.00951585	0.00706365	0.0108613	0.0047091	0.821626	g__Roseburia	0.990041
1.80841e-05	0	4.21962e-06	0	0.215592	g__Rothia	0.710295
4.34018e-05	0	4.64159e-05	0	0.936293	g__Ruminiclostridium	0.990041
2.17009e-05	0	5.90747e-05	0	0.271649	g__Ruminiclostridium_1	0.710295
0.00293324	0.00220264	0.00254021	0.00155704	0.516634	g__Ruminiclostridium_5	0.816943
0.00221349	0	0.00369217	7.59532e-05	0.832098	g__Ruminiclostridium_6	0.990041
0.00109951	0.000455719	0.000907219	0.000645602	0.543861	g__Ruminiclostridium_9	0.839933
0.00189521	0.000911439	0.00380188	0.000721556	0.644369	g__Ruminococcaceae_NK4A214_group	0.928657
0.00655006	0.00364575	0.0117095	0.0076333	0.351149	g__Ruminococcaceae_UCG_002	0.710295
0.000531672	0.000151906	0.000540112	0.000417743	0.687587	g__Ruminococcaceae_UCG_003	0.938821
0.00181564	0.00174692	0.0015908	0.000873462	0.446666	g__Ruminococcaceae_UCG_004	0.768806
0.00257879	0.00151906	0.00423228	0.00254443	0.629821	g__Ruminococcaceae_UCG_005	0.920434
3.61682e-06	0	4.64159e-05	0	0.104085	g__Ruminococcaceae_UCG_007	0.710295
0.000528056	0	8.01728e-05	0	0.972489	g__Ruminococcaceae_UCG_008	0.992642
8.68037e-05	0	0.000105491	0	0.351415	g__Ruminococcaceae_UCG_009	0.710295
0.000683579	0.000151906	0.00124057	0.000265836	0.517744	g__Ruminococcaceae_UCG_010	0.816943
0	0	0	0		g__Ruminococcaceae_UCG_011
0.00271985	0.00144311	0.00294952	0.00170895	0.988754	g__Ruminococcaceae_UCG_013	0.99931
0.00575436	0.00182288	0.00721977	0.00174692	0.677241	g__Ruminococcaceae_UCG_014	0.933672
0.00629688	0.0035698	0.00460783	0.00201276	0.436499	g__Ruminococcus_1	0.767737
0.0600935	0.0575725	0.054007	0.0205453	0.563192	g__Ruminococcus_2	0.859927
0	0	0	0		g__S5_A14a
3.61682e-06	0	1.68785e-05	0	0.464349	g__Sanguibacteroides	0.79189
0	0	2.53177e-05	0	0.303626	g__Sarcina	0.710295
3.61682e-06	0	4.21962e-06	0	0.941237	g__Scardovia	0.990041
0	0	0	0		g__Schlegelella
3.61682e-06	0	4.21962e-06	0	0.941237	g__Sediminibacterium	0.990041
0	0	0	0		g__Selenomonas_3
0	0	0	0		g__Selenomonas_4
0.000618476	7.59532e-05	0.000278495	0	0.312089	g__Sellimonas	0.710295
0.000506355	0	0.000316472	0	0.805532	g__Senegalimassilia	0.989463
0.000162757	0	0.00010971	3.79766e-05	0.766908	g__Shuttleworthia	0.976689
3.25514e-05	0	6.7514e-05	0	0.299138	g__Slackia	0.710295
3.61682e-06	0	0	0	0.381908	g__Sneathia	0.710295
1.44673e-05	0	1.26589e-05	0	0.808294	g__Solobacterium	0.989463
0	0	4.21962e-06	0	0.303626	g__Sphingobium	0.710295
3.61682e-06	0	4.21962e-06	0	0.941237	g__Sphingomonas	0.990041
1.80841e-05	0	0.000143467	0.00011393	1.39952e-06	g__Staphylococcus	0.000198731
0	0	0	0		g__Stenotrophomonas
0	0	0	0		g__Stomatobaculum
0.0174982	0.00622816	0.0115871	0.000987392	0.142777	g__Streptococcus	0.710295
0.0551891	0.0538508	0.0291323	0.0213049	0.0346014	g__Subdoligranulum	0.710295
0	0	0	0		g__Succinatimonas
0	0	0	0		g__Succiniclasticum
1.08505e-05	0	0	0	0.381908	g__Succinivibrio	0.710295
0.00313578	0.00167097	0.000919878	0.00011393	0.0139822	g__Sutterella	0.567277
0	0	0	0		g__Synergistes
1.80841e-05	0	0	0	0.381908	g__Syntrophococcus	0.710295
0	0	0	0		g__Syntrophomonas
0	0	4.21962e-06	0	0.303626	g__Tepidimonas	0.710295
0.00111036	0	0.000527453	3.79766e-05	0.97553	g__Terrisporobacter	0.992642
0	0	0	0		g__Tetragenococcus
0	0	0	0		g__Treponema_2
0.000868037	0.000151906	0.000362888	3.79766e-05	0.316709	g__Turicibacter	0.710295
0.00022786	0	1.68785e-05	0	0.736151	g__Tyzzerella	0.972426
0.000748682	0	0.000206762	0	0.330012	g__Tyzzerella_3	0.710295
0.000434018	0	0.000139248	0	0.355737	g__Tyzzerella_4	0.710295
0.000828252	0.000303813	0.00113508	0.000455719	0.487897	g__UBA1819	0.80094
0.000235093	0	1.68785e-05	0	0.108707	g__UC5_1_2E3	0.710295
0	0	0	0		g__un_c__Alphaproteobacteria
0	0	0	0		g__un_c__Bacilli
0	0	0	0		g__un_c__Bacteroidia
7.23364e-05	0	7.17336e-05	3.79766e-05	0.913369	g__un_c__Clostridia	0.990041
3.61682e-06	0	0	0	0.381908	g__un_c__Gammaproteobacteria	0.710295
0	0	0	0		g__un_f__Actinomycetaceae
0	0	0	0		g__un_f__Atopobiaceae
3.61682e-05	0	8.43925e-06	0	0.978657	g__un_f__Barnesiellaceae	0.992642
0	0	0	0		g__un_f__Burkholderiaceae
0	0	0	0		g__un_f__Caulobacteraceae
7.957e-05	0	0.00011393	0	0.836565	g__un_f__Christensenellaceae	0.990041
0	0	0	0		g__un_f__Clostridiaceae_1
2.89346e-05	0	2.53177e-05	0	0.753873	g__un_f__Clostridiales_vadinBB60_group	0.972426
0.00155523	0.000455719	0.00305501	0.000151906	0.222057	g__un_f__Coriobacteriales_Incertae_Sedis	0.710295
2.53177e-05	0	2.95374e-05	0	0.593548	g__un_f__Desulfovibrionaceae	0.888574
0.00142503	0	0.000843925	0	1	g__un_f__Eggerthellaceae	1
0	0	0	0		g__un_f__Enterobacteriaceae
5.42523e-05	0	5.06355e-05	0	0.645893	g__un_f__Erysipelotrichaceae	0.928657
5.06355e-05	0	3.79766e-05	0	0.405203	g__un_f__Family_XIII	0.731151
0	0	0	0		g__un_f__Fimbriimonadaceae
2.89346e-05	0	0.000126589	0	0.0824266	g__un_f__Flavobacteriaceae	0.710295
0.00879972	0.00577244	0.00734636	0.00679781	0.516953	g__un_f__Lachnospiraceae	0.816943
7.23364e-06	0	8.43925e-06	0	0.893415	g__un_f__Mitochondria	0.990041
0.00158778	0	0.00549817	0	0.255215	g__un_f__Muribaculaceae	0.710295
0	0	2.53177e-05	0	0.00485368	g__un_f__Neisseriaceae	0.344611
0	0	0	0		g__un_f__Paludibacteraceae
0	0	0	0		g__un_f__Parachlamydiaceae
5.42523e-05	0	7.59532e-05	0	1	g__un_f__Peptococcaceae	1
0	0	0	0		g__un_f__Peptostreptococcaceae
5.42523e-05	0	0.000316472	0	0.497233	g__un_f__Prevotellaceae	0.811003
0	0	4.21962e-06	0	0.303626	g__un_f__Puniceicoccaceae	0.710295
0	0	0	0		g__un_f__Rikenellaceae
0.00125504	0.000987392	0.00802572	0.00110132	0.258951	g__un_f__Ruminococcaceae	0.710295
0	0	0	0		g__un_f__Succinivibrionaceae
0	0	8.43925e-06	0	0.303626	g__un_f__vadinBE97	0.710295
0	0	4.21962e-06	0	0.303626	g__un_f__Veillonellaceae	0.710295
1.08505e-05	0	2.10981e-05	0	0.483271	g__un_f__Victivallaceae	0.80094
0.000658261	0.000683579	7.17336e-05	7.59532e-05	2.43119e-07	g__un_k__Bacteria	6.90457e-05
3.61682e-06	0	3.79766e-05	0	0.911985	g__un_o__Bacteroidales	0.990041
0.000104888	0	6.32943e-05	0	0.88699	g__un_o__Clostridiales	0.990041
0.000155523	0	4.21962e-05	0	0.745419	g__un_o__Coriobacteriales	0.972426
0	0	0	0		g__un_o__Desulfovibrionales
1.44673e-05	0	8.43925e-06	0	0.513467	g__un_o__Gammaproteobacteria_Incertae_Sedis	0.816943
3.25514e-05	0	1.26589e-05	0	0.4866	g__un_o__Gastranaerophilales	0.80094
7.23364e-06	0	8.43925e-06	0	0.941237	g__un_o__Izimaplasmatales	0.990041
0.000188075	0	0.000278495	0	0.876755	g__un_o__Mollicutes_RF39	0.990041
3.61682e-06	0	0	0	0.381908	g__un_o__Myxococcales	0.710295
0	0	8.43925e-06	0	0.130745	g__un_o__Obscuribacterales	0.710295
0	0	4.21962e-06	0	0.303626	g__un_o__Rhodospirillales	0.710295
0.000108505	7.59532e-05	4.21962e-05	0	0.0229538	g__un_p__Proteobacteria	0.651888
5.06355e-05	0	0	0	0.000974036	g__un_Unclassified	0.0922087
0	0	0	0		g__unidentified
7.23364e-06	0	8.43925e-06	0	0.941237	g__Varibaculum	0.990041
0.000379766	0	0.000194103	0	0.465653	g__Veillonella	0.79189
0	0	0	0		g__Vibrio
7.23364e-06	0	4.21962e-06	0	0.970609	g__Victivallis	0.992642
7.23364e-05	0	1.26589e-05	0	0.27244	g__Weissella	0.710295
0	0	0	0		g__Wolinella

## Sheet: Zeller_15AdvadnGenusWilcoxTest
Supplementary Table4: The Wilcoxon test results of the relative abundance of genera for the advance adenoma versus the normal within the each study.
Adv_Adenoma_mean	Adv_Adenoma_median	Normal_mean	Normal_median	pvalue	measures	FDR
1.38222e-06	0	0	0	0.0546135	g__Anaerorhabdus_furcosa_group	0.47851
5.66709e-05	0	0.000508517	0	0.415184	g__Bacteroides_pectinophilus_group	0.772815
2.48799e-05	0	0.000112125	1.79688e-05	0.294141	g__Clostridium_innocuum_group	0.772815
9.81373e-05	1.79688e-05	0.000520736	8.08596e-05	0.0694702	g__Eubacterium_brachy_group	0.497526
0.0396516	0.0240602	0.0234734	0.018418	0.54655	g__Eubacterium_coprostanoligenes_group	0.772815
0.00751787	0.00332423	0.0108125	0.00589377	0.491381	g__Eubacterium_eligens_group	0.772815
0.00672724	0.0024797	0.0163239	0.0122817	0.0178209	g__Eubacterium_hallii_group	0.415251
3.73198e-05	3.59376e-05	0.000148782	3.59376e-05	0.437535	g__Eubacterium_nodatum_group	0.772815
4.14665e-05	1.79688e-05	4.09689e-05	0	0.482147	g__Eubacterium_oxidoreducens_group	0.772815
0.00645357	0.000107813	0.00471897	5.39064e-05	0.45166	g__Eubacterium_ruminantium_group	0.772815
0	0	2.15626e-06	0	0.305414	g__Eubacterium_saphenum_group	0.772815
0.00293168	0.00300079	0.00306763	0.00232696	0.475559	g__Eubacterium_ventriosum_group	0.772815
0.00123708	0.00104219	0.00146374	0.000655861	0.824918	g__Eubacterium_xylanophilum_group	0.898726
0.00291786	0.000557033	0.00319665	0.00152735	0.652532	g__Ruminococcus_gauvreauii_group	0.778525
0.00100902	8.9844e-05	0.00173471	0.000170704	0.218626	g__Ruminococcus_gnavus_group	0.772815
0.0167829	0.0147704	0.0213092	0.0119582	0.341541	g__Ruminococcus_torques_group	0.772815
4.14665e-06	0	1.90469e-05	0	0.791534	g__Abiotrophia	0.883275
0.000123017	3.59376e-05	6.03752e-05	8.9844e-06	0.0218389	g__Acetanaerobacterium	0.430539
2.76443e-05	0	4.45626e-05	0	0.607644	g__Acetitomaculum	0.772815
0.00433048	3.59376e-05	0.00352728	5.39064e-05	0.719848	g__Acidaminococcus	0.82716
3.59376e-05	1.79688e-05	3.73751e-05	0	0.148919	g__Acinetobacter	0.706252
4.42309e-05	1.79688e-05	9.95472e-05	4.4922e-05	0.110553	g__Actinomyces	0.590033
0	0	7.18752e-07	0	0.63787	g__Actinotignum	0.772815
1.38222e-06	0	0	0	0.0546135	g__Adhaeribacter	0.47851
2.76443e-06	0	2.51563e-06	0	0.64028	g__Adlercreutzia	0.772815
1.38222e-06	0	3.95314e-06	0	0.629358	g__Aegilops_tauschii	0.772815
0	0	7.18752e-07	0	0.63787	g__Aerococcus	0.772815
0	0	1.07813e-06	0	0.63787	g__Aeromonas	0.772815
8.2933e-05	1.79688e-05	2.98282e-05	0	0.0817773	g__Afipia	0.537394
0.0313984	0.0240782	0.0222414	0.014411	0.199736	g__Agathobacter	0.772815
0.00816613	0.00274923	0.00788184	0.00103321	0.475289	g__Akkermansia	0.772815
5.52886e-06	0	8.62503e-06	0	0.618428	g__Alcaligenes	0.772815
0	0	0	0		g__Alishewanella
0.0103528	0.00663049	0.00874614	0.00444728	0.224602	g__Alistipes	0.772815
7.0493e-05	0	6.03752e-05	0	0.523688	g__Allisonella	0.772815
0	0	0	0		g__Alloiococcus
0.000139604	1.79688e-05	0.00193883	8.9844e-06	1	g__Alloprevotella	1
1.38222e-06	0	0	0	0.0546135	g__Allorhizobium_Neorhizobium_Pararhizobium_Rhizobium	0.47851
1.38222e-06	0	5.13908e-05	0	0.410256	g__Alloscardovia	0.772815
0	0	3.19845e-05	0	0.63787	g__Anaerobiospirillum	0.772815
6.91108e-06	0	2.04844e-05	0	0.582987	g__Anaerococcus	0.772815
0	0	0	0		g__Anaerocolumna
7.32574e-05	3.59376e-05	4.95939e-05	1.79688e-05	0.161135	g__Anaerofilum	0.717312
5.80531e-05	5.39064e-05	0.000100985	3.59376e-05	1	g__Anaerofustis	1
1.38222e-06	0	7.18752e-07	0	0.327816	g__Anaeroglobus	0.772815
1.79688e-05	0	0.00146266	0	0.216113	g__Anaeroplasma	0.772815
0	0	0	0		g__Anaerosporobacter
0.00811637	0.00603752	0.0266808	0.014384	0.0190848	g__Anaerostipes	0.415849
0.000458896	8.9844e-05	0.000125063	5.39064e-05	0.104331	g__Anaerotruncus	0.590033
1.38222e-06	0	1.4375e-06	0	0.327816	g__Anaerovorax	0.772815
3.31732e-05	0	1.00625e-05	0	0.290824	g__Angelakisella	0.772815
0	0	0	0		g__Anoxybacillus
0	0	3.59376e-07	0	0.63787	g__Arcobacter	0.772815
0	0	0	0		g__Arthrobacter
2.34977e-05	0	4.31251e-06	0	0.564554	g__Asteroleplasma	0.772815
5.52886e-06	0	2.08438e-05	0	0.253787	g__Atopobium	0.772815
1.38222e-06	0	0.00024222	0	0.0677449	g__Azospirillum_sp__47_25	0.497526
0	0	4.31251e-06	0	0.381875	g__Bacillus	0.772815
1.38222e-06	0	8.9844e-06	0	0.612644	g__Bacteroidales_bacterium_55_9	0.772815
0.136351	0.12217	0.092028	0.068542	0.0605525	g__Bacteroides	0.496461
0.000982755	0.00014375	0.000658018	0.000188672	0.857603	g__Barnesiella	0.918152
0	0	0	0		g__Basfia
0	0	0	0		g__Bdellovibrio
0	0	3.59376e-07	0	0.63787	g__Bergeyella	0.772815
0.00488475	0.00014375	0.0121634	0.00214727	0.042347	g__Bifidobacterium	0.47851
0.00122188	0.000808596	0.000559549	0.000314454	0.0295526	g__Bilophila	0.47851
0	0	2.87501e-06	0	0.63787	g__Blastocatella	0.772815
0	0	3.59376e-07	0	0.63787	g__Blastococcus	0.772815
0.0479187	0.0266837	0.101826	0.0706444	0.0116641	g__Blautia	0.376939
1.38222e-06	0	0	0	0.0546135	g__Bosea	0.47851
0	0	1.4375e-06	0	0.48453	g__Brachybacterium	0.772815
0	0	0	0		g__Brachyspira
1.38222e-06	0	6.82815e-06	0	0.499446	g__Brevibacillus	0.772815
1.10577e-05	0	1.18594e-05	0	0.327816	g__Brevibacterium	0.772815
0	0	0	0		g__Brevundimonas
0	0	3.59376e-07	0	0.63787	g__Brochothrix	0.772815
0	0	3.23439e-06	0	0.305512	g__Bulleidia	0.772815
0	0	7.18752e-07	0	0.63787	g__Burkholderia_Caballeronia_Paraburkholderia	0.772815
0.00395037	0.00262345	0.00207935	0.00151836	0.00205006	g__Butyricicoccus	0.248985
0.000371816	0.000107813	0.000326314	5.39064e-05	0.537572	g__Butyricimonas	0.772815
0.00300632	0.000125782	0.00597642	3.59376e-05	0.280235	g__Butyrivibrio	0.772815
0.00142368	3.59376e-05	0.00191691	1.79688e-05	0.243767	g__CAG_352	0.772815
0.000740868	0.000592971	0.00133975	0.000314454	0.959172	g__CAG_56	0.975862
0	0	1.4375e-05	0	0.63787	g__CAG_873	0.772815
0	0	0	0		g__Caldicoprobacter
2.76443e-06	0	3.59376e-07	0	0.0477362	g__Campylobacter	0.47851
0	0	3.09063e-05	0	0.63787	g__Candidatus_Gastranaerophilales_bacterium_Zag_111	0.772815
9.53729e-05	0	1.00625e-05	0	0.376778	g__Candidatus_Melainabacteria_bacterium_MEL_A1	0.772815
0	0	3.23439e-06	0	0.484587	g__Candidatus_Methanomethylophilus	0.772815
0	0	0	0		g__Candidatus_Saccharimonas
0.000132693	0.00014375	0.000108891	0.000107813	0.407991	g__Candidatus_Soleaferrea	0.772815
0	0	1.79688e-06	0	0.484587	g__Candidatus_Stoquefichus	0.772815
0	0	3.59376e-07	0	0.63787	g__Capnocytophaga	0.772815
0.000129928	8.9844e-05	7.00783e-05	3.59376e-05	0.154719	g__Caproiciproducens	0.717312
4.14665e-06	0	3.59376e-07	0	0.300931	g__Cardiobacterium	0.772815
0.000194892	3.59376e-05	0.000131172	3.59376e-05	0.910251	g__Carnobacterium	0.95596
3.45554e-05	1.79688e-05	6.21721e-05	3.59376e-05	0.403311	g__Catabacter	0.772815
0.000510038	0	0.00241213	0	0.0767106	g__Catenibacterium	0.523625
1.38222e-06	0	0.00106663	0	0.927826	g__Catenisphaera	0.96357
0.000109195	5.39064e-05	7.72659e-05	8.9844e-06	0.051068	g__Caulobacter	0.47851
0	0	3.01876e-05	0	0.305544	g__Cellulosilyticum	0.772815
1.65866e-05	0	1.97657e-05	0	0.663707	g__Cercis_gigantea	0.784263
2.76443e-06	0	1.07813e-06	0	0.580722	g__CHKCI001	0.772815
0	0	1.07813e-06	0	0.484587	g__CHKCI002	0.772815
0.011319	0.00503127	0.0147811	0.00485158	0.912087	g__Christensenellaceae_R_7_group	0.95596
0	0	1.4375e-05	0	0.63787	g__Chroococcidiopsis_CC1	0.772815
0	0	0	0		g__Chroococcidiopsis_PCC_7203
0	0	7.18752e-07	0	0.48453	g__Chryseobacterium	0.772815
0.00244514	1.79688e-05	0.000437361	1.79688e-05	0.451268	g__Cloacibacillus	0.772815
2.21155e-05	0	2.22813e-05	0	0.870411	g__Cloacibacterium	0.923605
2.76443e-06	0	0.000181844	0	0.338927	g__Clostridiales_bacterium_enrichment_culture_clone_06_1235251_67	0.772815
0	0	0	0		g__Clostridioides
0.0016863	0.00123985	0.00422734	0.00118594	0.640301	g__Clostridium_sensu_stricto_1	0.772815
0	0	0	0		g__Clostridium_sensu_stricto_13
0	0	0	0		g__Clostridium_sensu_stricto_2
0	0	7.18752e-07	0	0.48453	g__Clostridium_sensu_stricto_3	0.772815
5.80531e-05	0	1.25782e-05	0	0.880712	g__Clostridium_sp__CAG_306	0.93014
0.000320674	0	0.000182922	0	0.933313	g__Clostridium_sp__K4410_MGS_306	0.96357
0	0	0	0		g__Collinsella
0	0	2.15626e-06	0	0.484587	g__Conchiformibius	0.772815
0.000312381	8.9844e-05	0.000367282	1.79688e-05	0.304613	g__Coprobacter	0.772815
0.00100902	0.000646877	0.00133544	0.000781643	0.639903	g__Coprococcus_1	0.772815
0.0155071	0.00319845	0.0112531	0.00153633	0.67069	g__Coprococcus_2	0.788823
0.00801271	0.00751096	0.00816754	0.00485158	0.205751	g__Coprococcus_3	0.772815
0	0	4.67189e-06	0	0.305512	g__Coriobacteriaceae_UCG_002	0.772815
0	0	1.22188e-05	0	0.0213429	g__Corynebacterium	0.430539
1.9351e-05	0	8.22971e-05	0	0.503611	g__Corynebacterium_1	0.772815
1.24399e-05	0	8.9844e-06	0	0.375618	g__Cuneatibacter	0.772815
0	0	3.59376e-07	0	0.63787	g__Cutibacterium	0.772815
0.000302705	0.00030547	0.000301157	0.000179688	0.603108	g__Defluviitaleaceae_UCG_011	0.772815
0	0	0	0		g__Deinococcus
0	0	0	0		g__Denitrobacterium
0	0	0	0		g__Dermacoccus
0	0	0	0		g__Desulfitibacter
0	0	0	0		g__Desulfotomaculum
0.00747779	0.00131172	0.0023169	0.00100625	0.214471	g__Desulfovibrio	0.772815
0	0	0	0		g__Desulfurispora
0.00793392	5.39064e-05	0.00520484	7.18752e-05	0.579049	g__Dialister	0.772815
3.04087e-05	0	1.79688e-05	0	0.136889	g__Dielma	0.66673
0	0	0	0		g__DNF00809
0	0	0	0		g__Dolosigranulum
0.0107053	0.00659455	0.0156756	0.0107993	0.269583	g__Dorea	0.772815
0.000315145	0.000251563	8.84065e-05	1.79688e-05	0.00400046	g__DTU089	0.248985
0	0	3.59376e-07	0	0.63787	g__Duganella	0.772815
1.38222e-06	0	0	0	0.0546135	g__Dyadobacter	0.47851
0	0	1.4375e-06	0	0.63787	g__Dysgonomonas	0.772815
0	0	9.34378e-06	0	0.105091	g__Eggerthella	0.590033
0.000294412	0.000125782	0.00045497	7.18752e-05	0.488516	g__Eisenbergiella	0.772815
0	0	3.23439e-06	0	0.63787	g__Elusimicrobium	0.772815
2.76443e-06	0	3.23439e-06	0	0.596618	g__Enhydrobacter	0.772815
0.000163101	1.79688e-05	0.000283548	1.79688e-05	0.557836	g__Enterobacter	0.772815
0.00203462	0.000107813	0.0016499	8.9844e-05	0.479316	g__Enterococcus	0.772815
1.38222e-06	0	4.31251e-06	0	0.612644	g__Enterorhabdus	0.772815
0.000117488	0	0.000284626	0	0.473404	g__Epulopiscium	0.772815
0.000194892	5.39064e-05	0.000462158	7.18752e-05	0.822755	g__Erysipelatoclostridium	0.898726
0.00643974	0.00309063	0.00775354	0.00287501	0.721267	g__Erysipelotrichaceae_UCG_003	0.82716
2.34977e-05	0	2.80313e-05	0	0.559476	g__Erysipelotrichaceae_UCG_004	0.772815
0	0	2.94688e-05	0	0.381875	g__Erysipelotrichaceae_UCG_006	0.772815
0.000257092	0	3.59376e-06	0	0.300931	g__Erysipelotrichaceae_UCG_009	0.772815
0.00459172	0.00104219	0.0117886	0.00067383	0.945824	g__Escherichia_Shigella	0.971641
0	0	0	0		g__Ethanoligenens
0.000136839	0	0.000175016	1.79688e-05	0.0934972	g__Eubacterium	0.569233
1.52044e-05	0	1.00625e-05	0	0.385436	g__Ezakiella	0.772815
0	0	1.4375e-06	0	0.381833	g__F0332	0.772815
0	0	7.18752e-07	0	0.48453	g__Facklamia	0.772815
0.0761573	0.0630346	0.0473205	0.0401064	0.0731605	g__Faecalibacterium	0.513363
4.69953e-05	0	3.95314e-06	0	0.186413	g__Faecalicoccus	0.77175
7.0493e-05	0	0.000124344	0	0.746282	g__Faecalitalea	0.848643
0.00130896	0.00113203	0.00239344	0.00188672	0.110336	g__Family_XIII_AD3011_group	0.590033
0.000866649	0.000485158	0.000427658	0.000233594	0.0558257	g__Family_XIII_UCG_001	0.47851
2.76443e-06	0	0	0	0.0546135	g__Fastidiosipila	0.47851
0	0	1.07813e-06	0	0.63787	g__Filifactor	0.772815
4.14665e-06	0	7.90627e-06	0	0.485041	g__Finegoldia	0.772815
0	0	0	0		g__Firmicutes_bacterium_CAG_345
0	0	0	0		g__Firmicutes_bacterium_CAG_822
0	0	2.51563e-06	0	0.63787	g__Flavisolibacter	0.772815
0.000778188	0.000575002	0.000559908	0.000242579	0.0342431	g__Flavonifractor	0.47851
0	0	0	0		g__Fluviicola
0.000416047	0.000215626	0.00028822	7.18752e-05	0.0325632	g__Fournierella	0.47851
1.38222e-06	0	1.07813e-06	0	0.612644	g__Fretibacterium	0.772815
0	0	2.51563e-06	0	0.484587	g__Fructobacillus	0.772815
0.00461798	0.00524689	0.00793215	0.00303673	0.932321	g__Fusicatenibacter	0.96357
1.52044e-05	0	0.000950909	1.79688e-05	0.44138	g__Fusobacterium	0.772815
0	0	0	0		g__Gallicola
0	0	2.15626e-06	0	0.484587	g__Gardnerella	0.772815
0.000384256	0.000377345	0.00025911	0.000188672	0.0840027	g__GCA_900066225	0.540441
0.000822418	0.000467189	0.000539783	0.000377345	0.328436	g__GCA_900066575	0.772815
3.8702e-05	1.79688e-05	2.51563e-05	0	0.170702	g__GCA_900066755	0.725591
9.81373e-05	8.9844e-05	0.000210954	7.18752e-05	0.764884	g__Gemella	0.855843
5.1142e-05	3.59376e-05	6.75627e-05	1.79688e-05	0.361877	g__Geodermatophilus	0.772815
5.52886e-06	0	0	0	0.0546135	g__Georgenia	0.47851
0	0	0	0		g__Glutamicibacter
2.76443e-06	0	8.26565e-06	0	0.576784	g__Gordonibacter	0.772815
2.76443e-06	0	3.59376e-06	0	0.925361	g__Granulicatella	0.96357
0.00229033	0.00176094	0.00173255	0.000592971	0.399345	g__gut_metagenome	0.772815
0.000403607	0.000179688	0.000333142	2.69532e-05	0.429605	g__Haemophilus	0.772815
0.0090314	0.00141954	0.000587221	0	0.00214131	g__Hafnia_Obesumbacterium	0.248985
4.28487e-05	0	8.26565e-06	0	0.0611583	g__Harryflintia	0.496461
0	0	0	0		g__Helcococcus
0.00068005	0	0.00245741	1.79688e-05	0.0302253	g__Holdemanella	0.47851
0.000167248	7.18752e-05	7.79846e-05	3.59376e-05	0.0180544	g__Holdemania	0.415251
0.000516949	0	0.000552361	0	0.82087	g__Howardella	0.898726
0.000134075	3.59376e-05	7.22346e-05	1.79688e-05	0.23857	g__Hungatella	0.772815
3.1791e-05	0	2.33594e-05	0	0.918058	g__Hydrogenoanaerobacterium	0.959787
0	0	3.95314e-06	0	0.484587	g__Hymenobacter	0.772815
0.00118318	0.000287501	0.0026946	0.000700783	0.319669	g__Intestinibacter	0.772815
0.000121635	8.9844e-05	0.000120391	1.79688e-05	0.150121	g__Intestinimonas	0.706252
0	0	2.51563e-06	0	0.381833	g__Johnsonella	0.772815
4.14665e-06	0	1.4375e-06	0	0.327816	g__Kocuria	0.772815
1.79688e-05	0	2.51563e-06	0	0.123061	g__Lachnoanaerobaculum	0.63684
0.0180434	0.00427658	0.0112151	0.00309962	0.312211	g__Lachnoclostridium	0.772815
0	0	0	0		g__Lachnoclostridium_10
0.00907148	0.00278516	0.00572414	0.00267735	0.454837	g__Lachnospira	0.772815
0.0004741	0.000287501	0.000896643	0.000628908	0.199472	g__Lachnospiraceae_FCS020_group	0.772815
1.9351e-05	0	0.000162079	0	0.0995416	g__Lachnospiraceae_FE2018_group	0.590033
0	0	0	0		g__Lachnospiraceae_NC2004_group
0.000908116	0.000503127	0.000993316	0.000503127	0.959336	g__Lachnospiraceae_ND3007_group	0.975862
0	0	1.4375e-05	0	0.63787	g__Lachnospiraceae_NK3A20_group	0.772815
0.0132748	0.0113024	0.0118429	0.00553439	0.199725	g__Lachnospiraceae_NK4A136_group	0.772815
0	0	1.11407e-05	0	0.13027	g__Lachnospiraceae_NK4B4_group	0.650825
0.00125505	0.000844534	0.00129339	0.000503127	0.324172	g__Lachnospiraceae_UCG_001	0.772815
6.08175e-05	3.59376e-05	9.48753e-05	7.18752e-05	0.250042	g__Lachnospiraceae_UCG_002	0.772815
0.000494833	0	0.00125458	0	0.688226	g__Lachnospiraceae_UCG_003	0.802178
0.00164069	0.00158125	0.00185402	0.000853518	0.324218	g__Lachnospiraceae_UCG_004	0.772815
0	0	2.83907e-05	0	0.246022	g__Lachnospiraceae_UCG_007	0.772815
0.000521095	0.000503127	0.000373032	0.000125782	0.105942	g__Lachnospiraceae_UCG_008	0.590033
0.000348318	0	9.34378e-06	0	0.0436174	g__Lachnospiraceae_UCG_009	0.47851
0.00153979	0.00104219	0.00127435	0.000368361	0.158413	g__Lachnospiraceae_UCG_010	0.717312
0.000952347	7.18752e-05	0.00215087	0.000179688	0.294766	g__Lactobacillus	0.772815
0.000276443	7.18752e-05	0.00169338	0.000125782	0.694523	g__Lactococcus	0.805413
1.10577e-05	0	3.70157e-05	0	0.462165	g__Lactonifactor	0.772815
1.38222e-06	0	2.51563e-06	0	0.327816	g__Lautropia	0.772815
2.76443e-06	0	1.07813e-06	0	0.327816	g__Lawsonella	0.772815
0	0	4.31251e-06	0	0.381833	g__Leptotrichia	0.772815
0	0	1.07813e-06	0	0.63787	g__Leucobacter	0.772815
8.2933e-06	0	0.000118953	1.79688e-05	0.063067	g__Leuconostoc	0.497526
0	0	3.59376e-07	0	0.63787	g__Libanicoccus	0.772815
0	0	0	0		g__Luteibacter
8.2933e-05	7.18752e-05	9.41565e-05	7.18752e-05	0.850975	g__Lysinibacillus	0.915075
3.73198e-05	0	0.000153813	0	0.644013	g__Mailhella	0.772815
0	0	0	0		g__Marinilactibacillus
0	0	3.59376e-07	0	0.63787	g__Marmoricola	0.772815
0.000283354	0.000161719	0.000583627	0.000278516	0.569043	g__Marvinbryantia	0.772815
0	0	0	0		g__Massilia
5.52886e-06	0	0.00372062	0	0.258824	g__Megamonas	0.772815
0.000668992	0	0.00603393	3.59376e-05	0.0136572	g__Megasphaera	0.376939
6.35819e-05	0	3.16251e-05	0	0.482916	g__Merdibacter	0.772815
0.000312381	1.79688e-05	0.000714799	1.79688e-05	0.760662	g__metagenome	0.855745
0	0	1.4375e-06	0	0.381833	g__Methanobacterium	0.772815
0.00824906	0.000323439	0.00743154	0.000251563	0.864889	g__Methanobrevibacter	0.920473
0	0	0	0		g__Methanomassiliicoccus
0.000337261	0	0.000445267	0	0.490236	g__Methanosphaera	0.772815
0	0	2.87501e-06	0	0.246177	g__Methylobacillus	0.772815
8.56974e-05	3.59376e-05	3.55782e-05	0	0.0423869	g__Methylobacterium	0.47851
0	0	1.07813e-06	0	0.63787	g__Microbacterium	0.772815
0	0	1.79688e-06	0	0.381833	g__Micrococcus	0.772815
0.000139604	0	0.00150399	0	0.0861573	g__Mitsuokella	0.540441
1.38222e-06	0	0	0	0.0546135	g__Mobiluncus	0.47851
0	0	1.07813e-06	0	0.63787	g__Modestobacter	0.772815
0.00046166	3.59376e-05	0.000822971	7.18752e-05	0.452698	g__Mogibacterium	0.772815
0	0	7.18752e-07	0	0.63787	g__Moraxella	0.772815
0	0	7.18752e-07	0	0.48453	g__Morganella	0.772815
0.000364905	0.000359376	0.000183641	0.000125782	0.00642711	g__Moryella	0.266082
0	0	3.59376e-07	0	0.63787	g__mouse_gut_metagenome	0.772815
0	0	0	0		g__Mucilaginibacter
0	0	0	0		g__Mucispirillum
1.38222e-06	0	2.87501e-06	0	0.956648	g__Murdochiella	0.975862
0	0	0	0		g__Muribaculum
1.38222e-06	0	1.18594e-05	0	0.618442	g__Murimonas	0.772815
0	0	3.59376e-07	0	0.63787	g__Musa_acuminata_subsp__malaccensis	0.772815
0	0	0	0		g__Mycobacterium
0.00617021	0.00154532	0.00100374	0.000278516	0.00332236	g__Negativibacillus	0.248985
1.38222e-06	0	1.79688e-06	0	0.872294	g__Neisseria	0.923605
0	0	0	0		g__Neochlamydia
0	0	0	0		g__Nitrosomonas
0	0	1.07813e-06	0	0.484587	g__Nocardioides	0.772815
4.14665e-06	0	3.95314e-06	0	0.165672	g__Novosphingobium	0.725591
0.000812743	0.000485158	0.000762237	0.000368361	0.99322	g__Odoribacter	1
0	0	1.61719e-05	0	0.13027	g__Olsenella	0.650825
0.000109195	5.39064e-05	7.90627e-05	0	0.0323286	g__Oribacterium	0.47851
0.00245482	0.00089844	0.00124416	0.000592971	0.341396	g__Oscillibacter	0.772815
0.00025571	7.18752e-05	0.000158125	1.79688e-05	0.0566353	g__Oscillospira	0.47851
6.21997e-05	1.79688e-05	3.16251e-05	0	0.121514	g__Ottowia	0.636793
8.15507e-05	1.79688e-05	4.16876e-05	0	0.0124347	g__Oxalobacter	0.376939
0	0	0	0		g__Paenarthrobacter
4.14665e-06	0	1.00625e-05	0	0.748199	g__Paeniclostridium	0.848643
0	0	1.07813e-06	0	0.63787	g__Pantanalinema_CENA516	0.772815
4.56131e-05	1.79688e-05	4.06095e-05	1.79688e-05	0.942536	g__Papillibacter	0.970672
0.00835826	0.00490548	0.0060465	0.00309962	0.434566	g__Parabacteroides	0.772815
0	0	7.18752e-07	0	0.48453	g__Paraclostridium	0.772815
0.0186102	0.0185258	0.0184694	0.00688205	0.205751	g__Paracoccus	0.772815
0	0	0	0		g__Paraeggerthella
0	0	0	0		g__Parafrigoribacterium
0.00282248	1.79688e-05	0.00270035	1.79688e-05	0.560646	g__Paraprevotella	0.772815
0	0	2.87501e-06	0	0.246022	g__Parascardovia	0.772815
0.00121359	0.000269532	0.00184432	0.000296485	0.720669	g__Parasutterella	0.82716
8.2933e-06	0	0.000904909	8.9844e-06	0.0697016	g__Parvimonas	0.497526
0.00175265	0	9.2719e-05	0	0.496544	g__Pediococcus	0.772815
0	0	0	0		g__Pedobacter
0.000113342	1.79688e-05	0.000389564	1.79688e-05	0.928743	g__Peptococcus	0.96357
4.14665e-06	0	8.30159e-05	0	0.330173	g__Peptoniphilus	0.772815
6.91108e-06	0	0.000357579	0	0.140343	g__Peptostreptococcus	0.675607
0.019058	0.0216883	0.0127654	0.00584885	0.224535	g__Phascolarctobacterium	0.772815
0	0	1.07813e-06	0	0.63787	g__Phocaeicola	0.772815
0.000158955	5.39064e-05	1.86876e-05	0	0.000250511	g__Phocea	0.103711
0	0	0	0		g__Phreatobacter
9.67551e-06	0	3.59376e-07	0	0.0428638	g__Phyllobacterium	0.47851
0	0	0	0		g__Phytophthora_multivora
0	0	3.59376e-07	0	0.63787	g__PMMR1	0.772815
1.38222e-06	0	4.67189e-06	0	0.764065	g__Polaromonas	0.855843
0	0	0	0		g__Porphyromonadaceae_bacterium_C941
8.2933e-06	0	1.83282e-05	0	0.845006	g__Porphyromonas	0.911022
5.94353e-05	0	1.36563e-05	0	0.572179	g__Prevotella	0.772815
1.24399e-05	0	0.0028441	1.79688e-05	0.132052	g__Prevotella_2	0.650825
8.2933e-06	0	5.03127e-06	0	0.0771525	g__Prevotella_6	0.523625
0.00452399	0	0.00296952	0	0.75761	g__Prevotella_7	0.854633
0.0766176	0.000341407	0.0404589	0.000368361	0.616149	g__Prevotella_9	0.772815
0	0	7.18752e-07	0	0.48453	g__Prevotellaceae_Ga6A1_group	0.772815
0.00256954	1.79688e-05	0.000767987	0	0.307127	g__Prevotellaceae_NK3B31_group	0.772815
0.000152044	0	0.000170344	0	0.737925	g__Prevotellaceae_UCG_001	0.8416
0	0	9.70316e-06	0	0.63787	g__Prevotellaceae_UCG_004	0.772815
1.38222e-06	0	1.4375e-06	0	0.612644	g__Propionibacterium	0.772815
1.38222e-05	0	1.07813e-06	0	0.565093	g__Proteus	0.772815
1.38222e-05	0	0	0	0.0546135	g__Providencia	0.47851
0	0	0	0		g__Pseudoclavibacter
4.42309e-05	1.79688e-05	4.52814e-05	0	0.0654723	g__Pseudomonas	0.497526
0	0	3.59376e-07	0	0.63787	g__Pseudoramibacter	0.772815
0	0	0	0		g__Pseudorhodoferax
2.21155e-05	0	0	0	0.0546135	g__Pseudoxanthomonas	0.47851
6.35819e-05	0	0	0	0.0546135	g__Psychrobacter	0.47851
0	0	7.18752e-07	0	0.63787	g__Psychroglaciecola	0.772815
4.14665e-05	1.79688e-05	3.3422e-05	0	0.0810296	g__Pygmaiobacter	0.537394
0	0	5.75002e-06	0	0.381833	g__Pyramidobacter	0.772815
0	0	0	0		g__Ralstonia
0	0	1.86876e-05	0	0.0129571	g__Raoultibacter	0.376939
0	0	0	0		g__RB41
0	0	1.79688e-06	0	0.63787	g__Rhizorhapis	0.772815
0	0	3.59376e-07	0	0.63787	g__Rhodococcus	0.772815
0	0	1.15e-05	0	0.63787	g__Rhodopseudomonas	0.772815
0	0	8.26565e-06	0	0.199113	g__Rikenella	0.772815
1.52044e-05	0	0.000450658	0	0.513843	g__Rikenellaceae_RC9_gut_group	0.772815
0.00233871	0.00118594	0.0049522	0.0019586	0.337167	g__Romboutsia	0.772815
0.0161388	0.00862503	0.00666715	0.00398009	0.0108441	g__Roseburia	0.376939
0	0	3.59376e-07	0	0.63787	g__Roseomonas	0.772815
3.8702e-05	0	7.69065e-05	1.79688e-05	0.390895	g__Rothia	0.772815
0	0	7.18752e-07	0	0.63787	g__Rubellimicrobium	0.772815
0	0	0	0		g__Rubritepida
0	0	0	0		g__Rubrivirga
0	0	7.18752e-07	0	0.63787	g__Rubrobacter	0.772815
0	0	0	0		g__rumen_bacterium_YS2
0.000152044	0.000107813	8.51721e-05	5.39064e-05	0.0417385	g__Ruminiclostridium	0.47851
2.76443e-06	0	2.94688e-05	0	0.343152	g__Ruminiclostridium_1	0.772815
0.00351497	0.00280313	0.00263351	0.00203048	0.460006	g__Ruminiclostridium_5	0.772815
0.00206227	0.000197657	0.00329368	0.000521095	0.858272	g__Ruminiclostridium_6	0.918152
0.00187705	0.00140157	0.00153274	0.00112305	0.237768	g__Ruminiclostridium_9	0.772815
0.0116479	0.0095594	0.00398117	0.00256055	0.0174063	g__Ruminococcaceae_NK4A214_group	0.415251
0.030189	0.0259649	0.0235869	0.0179329	0.104806	g__Ruminococcaceae_UCG_002	0.590033
0.00106984	0.000646877	0.000958097	0.000251563	0.167126	g__Ruminococcaceae_UCG_003	0.725591
0.00201112	0.00125782	0.00192626	0.00148243	0.753332	g__Ruminococcaceae_UCG_004	0.85213
0.0103099	0.00787034	0.00589233	0.00459103	0.0653384	g__Ruminococcaceae_UCG_005	0.497526
0.000147897	0.000197657	0.00017286	5.39064e-05	0.203773	g__Ruminococcaceae_UCG_007	0.772815
0.000279208	7.18752e-05	0.000730971	1.79688e-05	0.415019	g__Ruminococcaceae_UCG_008	0.772815
0.000340025	0.000197657	0.000235751	8.08596e-05	0.349448	g__Ruminococcaceae_UCG_009	0.772815
0.00204568	0.000952347	0.00242471	0.000682815	0.805315	g__Ruminococcaceae_UCG_010	0.886703
2.07332e-05	0	2.87501e-06	0	0.105656	g__Ruminococcaceae_UCG_011	0.590033
0	0	0	0		g__Ruminococcaceae_UCG_012
0.00380109	0.0014375	0.00406347	0.00172501	0.664919	g__Ruminococcaceae_UCG_013	0.784263
0.0124482	0.00630705	0.0106519	0.00278516	0.341176	g__Ruminococcaceae_UCG_014	0.772815
0	0	1.4375e-06	0	0.63787	g__Ruminococcaceae_V9D2013_group	0.772815
0.0107868	0.00636096	0.0103353	0.00643283	0.959361	g__Ruminococcus_1	0.975862
0.0221569	0.00553439	0.0723492	0.0521455	0.0048113	g__Ruminococcus_2	0.248985
1.38222e-06	0	3.59376e-07	0	0.314122	g__S5_A14a	0.772815
6.91108e-06	0	2.26407e-05	0	0.342049	g__Sanguibacteroides	0.772815
1.38222e-06	0	6.82815e-06	0	0.640415	g__Scardovia	0.772815
0	0	1.07813e-06	0	0.63787	g__Schrenkiella_parvula	0.772815
0	0	7.18752e-07	0	0.63787	g__Schwartzia	0.772815
0	0	9.34378e-06	0	0.63787	g__Scytonema_UTEX_2349	0.772815
5.52886e-06	0	5.39064e-06	0	0.327816	g__Selenomonas	0.772815
6.91108e-06	0	2.15626e-06	0	0.00457147	g__Selenomonas_3	0.248985
1.38222e-06	0	0	0	0.0546135	g__Selenomonas_4	0.47851
0.000118871	1.79688e-05	0.001449	3.59376e-05	0.351161	g__Sellimonas	0.772815
6.91108e-06	0	5.75002e-06	0	0.234251	g__Senegalimassilia	0.772815
0.000179688	0	1.40157e-05	0	0.00573298	g__Serratia	0.263717
0	0	0	0		g__Shewanella
1.10577e-05	0	1.79688e-05	0	0.864457	g__Shuttleworthia	0.920473
2.76443e-06	0	7.18752e-07	0	0.565058	g__Slackia	0.772815
1.38222e-06	0	3.59376e-07	0	0.314122	g__Solibacillus	0.772815
0	0	0	0		g__Solirubrobacter
0.000251563	0	0.000179688	0	0.534542	g__Solobacterium	0.772815
0	0	2.15626e-06	0	0.63787	g__Sphingoaurantiacus	0.772815
0	0	0	0		g__Sphingobacterium
0.0461411	0.0401603	0.0472928	0.021329	0.288458	g__Sphingomonas	0.772815
0	0	7.18752e-07	0	0.63787	g__Spirosoma	0.772815
0	0	6.10939e-06	0	0.160955	g__Sporobacter	0.717312
0	0	0	0		g__Sporosarcina
0.00015619	0	9.73909e-05	0	0.414581	g__Staphylococcus	0.772815
6.91108e-06	0	2.87501e-06	0	0.793943	g__Stenotrophomonas	0.883581
2.76443e-06	0	1.4375e-06	0	0.596488	g__Stomatobaculum	0.772815
0.00672448	0.00357579	0.036844	0.00983792	0.0374743	g__Streptococcus	0.47851
0.0234935	0.0192087	0.0264734	0.0152915	0.689796	g__Subdoligranulum	0.802178
0	0	4.70783e-05	0	0.63787	g__Succinatimonas	0.772815
0.00246311	0	5.39064e-06	0	0.684975	g__Succiniclasticum	0.801073
0.00135734	0	0.00210379	0	0.219689	g__Succinivibrio	0.772815
0.00125782	0.000323439	0.00143391	0.00067383	0.804702	g__Sutterella	0.886703
0	0	7.18752e-06	0	0.484587	g__Synergistes	0.772815
0	0	1.15e-05	0	0.130505	g__Syntrophococcus	0.650825
1.38222e-06	0	1.07813e-06	0	0.840667	g__Syntrophomonas	0.908711
0.000616468	1.79688e-05	0.000598361	3.59376e-05	0.673476	g__Terrisporobacter	0.789856
1.38222e-06	0	2.15626e-06	0	0.62889	g__Tetrasphaera	0.772815
0	0	0	0		g__Thermomonas
0	0	0	0		g__TM7_phylum_sp__oral_clone_FR058
0	0	1.72501e-05	0	0.19878	g__Treponema_2	0.772815
0	0	0	0		g__Tropheryma
0	0	1.4375e-06	0	0.63787	g__Truepera	0.772815
0.000118871	0	0.00048372	3.59376e-05	0.173511	g__Turicibacter	0.725591
0.000174159	0.000107813	8.33753e-05	1.79688e-05	0.00460945	g__Tyzzerella	0.248985
0.000598499	1.79688e-05	0.000485158	0	0.342342	g__Tyzzerella_3	0.772815
7.87863e-05	0	0.000459283	0	0.802417	g__Tyzzerella_4	0.886703
0.00180517	0.000575002	0.00080069	0.000350392	0.16088	g__UBA1819	0.717312
0	0	0	0		g__un_c__Actinobacteria
0	0	5.71408e-05	0	0.199176	g__un_c__Alphaproteobacteria	0.772815
0	0	0	0		g__un_c__Bacilli
0.000310999	0.000161719	0.000187954	0.000116797	0.172672	g__un_c__Clostridia	0.725591
0	0	0	0		g__un_c__Gammaproteobacteria
0	0	3.59376e-07	0	0.63787	g__un_f__67_14	0.772815
0	0	3.59376e-07	0	0.63787	g__un_f__Acetobacteraceae	0.772815
0	0	3.59376e-07	0	0.63787	g__un_f__Acidaminococcaceae	0.772815
0	0	0	0		g__un_f__Actinomycetaceae
0	0	0	0		g__un_f__Bacillaceae
0	0	3.59376e-07	0	0.63787	g__un_f__Bacteroidales_RF16_group	0.772815
6.35819e-05	0	0.000209876	0	0.804233	g__un_f__Barnesiellaceae	0.886703
0	0	3.59376e-07	0	0.63787	g__un_f__Beijerinckiaceae	0.772815
1.38222e-06	0	0	0	0.0546135	g__un_f__Burkholderiaceae	0.47851
0	0	0	0		g__un_f__Caulobacteraceae
0.000327585	0.000287501	0.000337454	0.000242579	0.818443	g__un_f__Christensenellaceae	0.898726
0	0	0	0		g__un_f__Chroococcidiopsaceae
0	0	1.07813e-06	0	0.484587	g__un_f__Clostridiaceae_1	0.772815
0.000192128	3.59376e-05	0.000859268	5.39064e-05	0.703639	g__un_f__Clostridiales_vadinBB60_group	0.813705
0.000760219	0.000269532	0.00126716	0.000170704	0.643178	g__un_f__Coriobacteriales_Incertae_Sedis	0.772815
6.49641e-05	0	9.09222e-05	0	0.656951	g__un_f__Desulfovibrionaceae	0.781047
2.48799e-05	0	4.27658e-05	0	0.25386	g__un_f__Eggerthellaceae	0.772815
1.38222e-06	0	3.59376e-07	0	0.314122	g__un_f__Enterobacteriaceae	0.772815
0.000150662	0	4.06095e-05	0	0.109382	g__un_f__Erysipelotrichaceae	0.590033
0	0	0	0		g__un_f__Eubacteriaceae
1.79688e-05	0	4.2047e-05	0	0.28837	g__un_f__Family_XIII	0.772815
0.000277825	0	0.000187594	0	0.311234	g__un_f__Flavobacteriaceae	0.772815
0	0	0	0		g__un_f__Ilumatobacteraceae
0.0148837	0.00941565	0.0106336	0.00977503	0.513178	g__un_f__Lachnospiraceae	0.772815
1.38222e-06	0	9.16409e-05	0	0.490245	g__un_f__Methanomethylophilaceae	0.772815
5.52886e-06	0	3.59376e-07	0	0.300931	g__un_f__Microbacteriaceae	0.772815
1.38222e-06	0	1.07813e-06	0	0.612644	g__un_f__Micrococcaceae	0.772815
0	0	0	0		g__un_f__Mitochondria
0.008596	0	0.000107094	1.79688e-05	1	g__un_f__Muribaculaceae	1
0	0	0	0		g__un_f__Neisseriaceae
0	0	3.59376e-07	0	0.63787	g__un_f__Oligoflexaceae	0.772815
2.62621e-05	0	2.26407e-05	0	1	g__un_f__Pasteurellaceae	1
0.000367669	0.000179688	0.000277079	0.000116797	0.173105	g__un_f__Peptococcaceae	0.725591
5.52886e-06	0	2.33594e-05	0	0.0695402	g__un_f__Peptostreptococcaceae	0.497526
0	0	0	0		g__un_f__Planococcaceae
0.00308372	0	0.00182815	0	0.992238	g__un_f__Prevotellaceae	1
0	0	7.18752e-07	0	0.63787	g__un_f__Promicromonosporaceae	0.772815
1.38222e-06	0	0.000102782	0	0.0850909	g__un_f__Puniceicoccaceae	0.540441
0	0	0	0		g__un_f__Rhizobiaceae
6.91108e-06	0	5.75002e-06	0	0.308616	g__un_f__Rhodobacteraceae	0.772815
0	0	3.59376e-07	0	0.63787	g__un_f__Rhodothermaceae	0.772815
0.00795603	0.00664846	0.00581866	0.0040879	0.0910348	g__un_f__Ruminococcaceae	0.562514
1.38222e-06	0	1.07813e-06	0	0.840667	g__un_f__Saccharimonadaceae	0.908711
0	0	0	0		g__un_f__Sphingomonadaceae
0	0	0	0		g__un_f__Tepidisphaeraceae
1.38222e-06	0	8.62503e-05	0	0.402398	g__un_f__vadinBE97	0.772815
1.38222e-06	0	6.82815e-06	0	0.62892	g__un_f__Veillonellaceae	0.772815
0	0	3.59376e-07	0	0.63787	g__un_f__Verrucomicrobiaceae	0.772815
3.73198e-05	0	0.000112485	0	0.23447	g__un_f__Victivallaceae	0.772815
0	0	0	0		g__un_f__WD2101_soil_group
5.52886e-06	0	3.19845e-05	0	0.111166	g__un_k__Bacteria	0.590033
0	0	2.51563e-06	0	0.63787	g__un_o__Armatimonadales	0.772815
2.76443e-06	0	3.59376e-07	0	0.300931	g__un_o__Bacillales	0.772815
8.2933e-06	0	0.000159563	0	0.540077	g__un_o__Bacteroidales	0.772815
0	0	0	0		g__un_o__Betaproteobacteriales
0.000476864	0.000323439	0.000429814	0.000359376	0.972884	g__un_o__Clostridiales	0.987191
1.38222e-05	0	2.26407e-05	0	0.827259	g__un_o__Coriobacteriales	0.898912
0	0	0	0		g__un_o__Frankiales
0	0	0	0		g__un_o__Gaiellales
0.00162134	0	6.07346e-05	0	0.526598	g__un_o__Gastranaerophilales	0.772815
9.67551e-06	0	6.72033e-05	0	0.30449	g__un_o__Izimaplasmatales	0.772815
0	0	3.59376e-07	0	0.63787	g__un_o__Lactobacillales	0.772815
0.00117903	0.000233594	0.00102638	8.9844e-05	0.736224	g__un_o__Mollicutes_RF39	0.8416
0	0	1.79688e-06	0	0.63787	g__un_o__Oxyphotobacteria_Incertae_Sedis	0.772815
1.38222e-06	0	9.91878e-05	0	0.629413	g__un_o__Rhodospirillales	0.772815
0	0	3.59376e-07	0	0.63787	g__un_o__Saccharimonadales	0.772815
0	0	3.59376e-07	0	0.63787	g__un_o__Selenomonadales	0.772815
0	0	0	0		g__un_o__WCHB1_41
0	0	0	0		g__un_p__BRC1
0	0	0	0		g__un_p__FBP
8.2933e-06	0	7.5469e-06	0	0.900008	g__un_p__Firmicutes	0.9481
1.38222e-06	0	3.59376e-07	0	0.314122	g__un_p__Proteobacteria	0.772815
5.52886e-06	0	3.09063e-05	0	0.301756	g__unidentified	0.772815
1.38222e-06	0	5.75002e-06	0	0.62892	g__Varibaculum	0.772815
0.000890147	0.000215626	0.000845612	0.000197657	0.658419	g__Veillonella	0.781047
0	0	1.4375e-06	0	0.484587	g__Vibrio	0.772815
7.32574e-05	0	8.58909e-05	0	0.558047	g__Victivallis	0.772815
0	0	0	0		g__W5053
0	0	0	0		g__wallaby_gut_metagenome
8.2933e-06	0	1.22188e-05	0	0.651726	g__Weissella	0.778525
